# Supplementary material for: Carbo-cyclohexadienes vs. carbo-benzenes: structure and conjugative properties
Source: Royal Society of Chemistry journal article supplement (doi:10.1039/c4sc02742f), 2014-11-07
Supplement: c4sc02742f1.pdf [file c4sc02742f1.pdf]

## Supplementary Information

### ***Carbo-cyclohexadienes vs carbo-benzenes:* structure and conjugative properties**

Arnaud Rives,<sup>[a,b]</sup> Iaroslav Baglai,<sup>[a,b,c]</sup> Cécile Barthes,<sup>[a,b]</sup> Valérie Maraval,<sup>[a,b]\*</sup>

Nathalie Saffon-Merceron,<sup>[d]</sup> Alix Saquet,<sup>[a,b]</sup> Zoia Voitenko,<sup>[c]</sup> Yulian Voloventko<sup>[c]</sup> and

Remi Chauvin<sup>[a,b]\*</sup>

*[a] CNRS, LCC (Laboratoire de Chimie de Coordination), 205 route de Narbonne, BP 44099, F-31077 Toulouse Cedex 4 (France)*

*[b] Université de Toulouse, UPS, INPT, F-31077 Toulouse Cedex 4 (France)*

*[c] Kiev National Taras Shevchenko University, 60 Volodymyrska St, 01033 Kiev (Ukraine)*

*[d] Université de Toulouse, UPS, Institut de Chimie de Toulouse, ICT-FR 2599, 118 route de Narbonne, 31062 Toulouse (France)*

*Fax: (+33)5 61 55 30 03. E-mail: [vmaraval@lcc-toulouse.fr](mailto:vmaraval@lcc-toulouse.fr), [chauvin@lcc-toulouse.fr](mailto:chauvin@lcc-toulouse.fr).*

#### Table of Contents

##### **1. General remarks**

##### **2. Voltammetric measurements**

##### **3. Crystal structure determination of 12b, 12c and 12d**

##### **4. Synthesis procedures and characterization of all new compounds**

##### **5. Copies of <sup>1</sup>H, <sup>13</sup>C and <sup>19</sup>F NMR spectra, and voltammograms**

##### **6. Voltammograms**

##### **7. UV-vis absorption spectra and solvatochromism of 12d**

##### **8. References**

## 1. General remarks.

THF and diethyl ether were dried and distilled over sodium/benzophenone, pentane and dichloromethane over  $P_2O_5$ . All other reagents were used as commercially available. In particular, commercial solutions of *n*-BuLi were 2.5 M in hexane, solutions of ethylmagnesium bromide were 3 M in THF, solutions of tetrabutylammonium fluoride were 1 M in THF, solutions of HCl were 2 M in diethylether. Previously described procedures were used for the preparation of **2**,<sup>[1]</sup> **6**,<sup>[2]</sup> **9**,<sup>[2]</sup> **10d**,<sup>[3]</sup> **10g**,<sup>[4]</sup> **11d**,<sup>[3]</sup> **11g**.<sup>[4]</sup> All reactions were carried out under nitrogen or Argon using Schlenk and vacuum line techniques. Column chromatographies were carried out on silica gel (60 P, 70-200 mm). Silica gel thin-layer chromatography plates (60F254, 0.25 mm) were revealed by treatment with an ethanolic solution of phosphomolybdic acid (20 %). The following analytical instruments were used.  $^1H$ ,  $^{13}C$  and  $^{19}F$  NMR: Bruker DPX 300, Avance 300, Avance 400 or Avance 500 spectrometers (most of the NMR spectra were recorded in  $CDCl_3$  solutions; NMR chemical shifts  $\delta$  are in ppm, with positive values to high frequency relative to the tetramethylsilane reference for  $^1H$  and  $^{13}C$  nuclei, and to  $CCl_3F$  for  $^{19}F$  nuclei; coupling constants *J* are in Hz). Mass spectrometry: Quadrupolar Nermag R10-10H spectrometer. UV: spectrometer Perkin-Elmer UV-Vis Win-Lab Lambda 35.

## 2. Voltammetric measurements.

Voltammetric measurements were carried out with a potentiostat Autolab PGSTAT100 controlled by GPES 4.09 software. Experiments were performed at room temperature in a home-made airtight three-electrode cell connected to a vacuum/argon line. The reference electrode consisted of a saturated calomel electrode (SCE) separated from the solution by a

bridge compartment. The counter electrode was a platinum wire of *ca* 1 cm<sup>2</sup> apparent surface. The working electrode was a Pt microdisk (0.5 mm diameter). The supporting electrolyte [*n*-Bu<sub>4</sub>N][PF<sub>6</sub>] was used as received (Fluka, 99% electrochemical grade) and simply degassed under argon. Dichloromethane was freshly distilled prior to use. The solutions used in the electrochemical studies were typically 10<sup>-3</sup> M in *carbo*-cyclohexadiene and 0.1 M in supporting electrolyte. Before each measurement, the solutions were degassed by bubbling argon, and the working electrode was polished with a polishing machine (Presi P230). Typical instrumental parameters for recorded square-wave voltammograms were: SW frequency *f* = 20 Hz, SW amplitude *E*<sub>sw</sub> = 20 mV, and scan increment *dE* = 0.5 mV.

### 3. Crystal structure determination of **12b**, **12c** and **12d**.

The X-ray data for compounds **12b**, **12c** and **12d** were collected at low temperature (105 K for **12b** and 193 K for **12c** and **12d**) on a GEMINI diffractometer (Oxford Diffraction) using the CuK $\alpha$  radiation (wavelength = 1.54180 Å) for **12b**, and on a Bruker-AXS APEX II Quazar diffractometer (**12c** and **12d**) using a 30 W air-cooled microfocus source with focusing multilayer optics MoK $\alpha$  radiation (wavelength = 0.71073 Å). Phi- and omega-scans were used. The structure of **12b** was solved by direct methods using SUPERFLIP,<sup>[5]</sup> and refined by full-matrix least-squares procedures using the programs of CRYSTALS.<sup>[6]</sup> Atomic scattering factors were taken from the International tables for X-ray Crystallography.<sup>[7]</sup> Absorption corrections were introduced using the program MULTISCAN.<sup>[8]</sup> The data of compounds **12c** and **12d** were integrated with SAINT,<sup>[9]</sup> and an empirical absorption correction with SADABS<sup>[10]</sup> was applied. The structures were solved by direct methods, using SHELXS-97 and refined using the least-squares method on *F*<sup>2</sup>.<sup>[11]</sup> All non-hydrogen atoms of

**12b**, **12c** and **12d** were refined anisotropically and hydrogen atoms were refined using a riding model. CCDC- 1003439 (**12b**), CCDC-951896 (**12c**) and CCDC-951897 (**12d**) contain the supplementary crystallographic data. These data can be obtained free of charge from The Cambridge Crystallographic Data Centre via [www.ccdc.cam.ac.uk/data\\_request/cif](http://www.ccdc.cam.ac.uk/data_request/cif) (or from the CCDC, 12 Union Road, Cambridge CB2 1EZ, UK; fax: (+44) 1223-336-033; or [deposit@ccdc.cam.ac.uk](mailto:deposit@ccdc.cam.ac.uk)).

#### Crystal data.

- **12b.**  $C_{48}H_{30}F_6O_4$ ,  $M = 784.75$ , Monoclinic, space group  $C2/c$ ,  $a = 13.07527(8) \text{ \AA}$ ,  $b = 16.18867(10) \text{ \AA}$ ,  $c = 19.01027(12) \text{ \AA}$ ,  $\beta = 100.1002(6)^\circ$ ,  $V = 3961.57(4) \text{ \AA}^3$ ,  $Z = 4$ , crystal  $0.15 \times 0.15 \times 0.25 \text{ mm}^3$ , 35692 reflections collected (3771 independent,  $R_{int} = 0.0213$ ), 262 parameters,  $R_1 [I > 2\sigma(I)] = 0.049$ ,  $wR2 [\text{all data}] = 0.065$ , largest diff. peak and hole: 0.61 and  $-0.21 \text{ e.\AA}^{-3}$ .

- **12c.**  $C_{48}H_{24}F_{12}O_2$ ,  $CHCl_3$ ,  $M = 980.04$ , Monoclinic, space group  $P2_1/c$ ,  $a = 12.8182(16) \text{ \AA}$ ,  $b = 35.815(5) \text{ \AA}$ ,  $c = 9.7626(14) \text{ \AA}$ ,  $\beta = 92.841(6)^\circ$ ,  $V = 4476.4(11) \text{ \AA}^3$ ,  $Z = 4$ , crystal  $0.20 \times 0.20 \times 0.04 \text{ mm}^3$ , 59064 reflections collected (7551 independent,  $R_{int} = 0.1994$ ), 653 parameters, 102 restraints,  $R_1 [I > 2\sigma(I)] = 0.0829$ ,  $wR2 [\text{all data}] = 0.2414$ , largest diff. peak and hole: 0.573 and  $-0.326 \text{ e.\AA}^{-3}$ .

- **12d.**  $C_{46}H_{26}F_6O_2$ ,  $CH_2Cl_2$ ,  $M = 809.59$ , Triclinic,  $P \bar{1}$ ,  $a = 12.5119(17) \text{ \AA}$ ,  $b = 12.6648(17) \text{ \AA}$ ,  $c = 14.9565(19) \text{ \AA}$ ,  $\alpha = 70.805(5)^\circ$ ,  $\beta = 66.621(5)^\circ$ ,  $\gamma = 67.665(5)^\circ$ ,  $V = 1967.5(5) \text{ \AA}^3$ ,  $Z = 2$ , crystal  $0.20 \times 0.10 \times 0.04 \text{ mm}^3$ , 28934 reflections collected (7350 independent,  $R_{int} = 0.0906$ ), 669 parameters, 489 restraints,  $R_1 [I > 2\sigma(I)] = 0.0672$ ,  $wR2 [\text{all data}] = 0.1983$ , largest diff. peak and hole: 0.212 and  $-0.314 \text{ e.\AA}^{-3}$ .

#### 4. Synthesis procedures and characterization of all new compounds

**[3,6-dimethoxy-3,6-bis(trifluoromethyl)-8-[tris(propan-2-yl)silyl]octa-1,4,7-triyn-1-yl]**

**tris (propan-2-yl)silane (3).** To a solution of the triyne **2** (2.53 g, 4.34 mmol) in dry THF (40 mL) under stirring at -78 °C were added 3.82 mL (9.55 mmol) of *n*-BuLi. The stirring was maintained 15 min. at -78 °C and then 15 min. at room temperature, before cooling again at -78 °C and adding methyl triflate (1.08 mL, 9.55 mmol). The temperature was allowed to warm slowly up to room temperature and the resulting mixture was stirred overnight, before treatment with saturated aqueous NH<sub>4</sub>Cl. The aqueous layer was extracted with diethylether and the combined organic layers were washed with brine, dried with MgSO<sub>4</sub> and evaporated under reduced pressure. The residue was purified by silicagel chromatography (pentane/DCM 9:1) to give **3** as a pale yellow oil in 89 % yield (2.35 g).

$\delta_{\text{H}}$  (CD<sub>3</sub>-C(O)-CD<sub>3</sub>) 1.11-1.14 (42 H, m, Si-CH-CH<sub>3</sub>), 3.64 (6 H, s, O-CH<sub>3</sub>).  $\delta_{\text{F}}$  (CD<sub>3</sub>-C(O)-CD<sub>3</sub>) - 80.24, - 80.27 (2 s, CF<sub>3</sub>).  $\delta_{\text{C}\{\text{H}\}}$  (CD<sub>3</sub>-C(O)-CD<sub>3</sub>) 10.74 (s, CH-CH<sub>3</sub>), 17.87 (s, CH-CH<sub>3</sub>), 53.34 (s, O-CH<sub>3</sub>), 70.77 (q, <sup>2</sup>*J*<sub>CF</sub> 35 Hz, C-CF<sub>3</sub>), 78.78 (s, C-C≡C-C), 92.72 (s, C≡C-Si), 95.38 (s, ≡C-Si), 121.50 (q, <sup>1</sup>*J*<sub>CF</sub> 283 Hz, CF<sub>3</sub>). MS (DCI/NH<sub>3</sub>): *m/z* 628.3 (M - NH<sub>4</sub>). HRMS (DCI/CH<sub>4</sub>): *m/z* calcd for C<sub>29</sub>H<sub>45</sub>OF<sub>6</sub>Si<sub>2</sub>: 579.2913, found: 579.2928.

**3,6-dimethoxy-3,6-bis(trifluoromethyl)octa-1,4,7-triyn-1-yl (1).** To a solution of the triyne **3** (1.80 g, 2.95 mmol) in THF (40 mL) under stirring at - 78 °C was added a TBAF solution (7.38 mL, 7.38 mmol). The stirring was maintained at the same temperature during 1.5 h before treatment with water. The organic layer was extracted with diethylether, the combined organic layers were washed with brine, dried over MgSO<sub>4</sub> and evaporated under reduced pressure. The residue was purified by silicagel chromatography (DCM/pentane 5:95) to give the bis-terminal triyne **1** as a quite volatile colorless oil which crystallized at low temperature

in 75 % yield (0.660 g).

$\delta_{\text{H}}$  ( $\text{CDCl}_3$ ) 2.78 (2 H, s,  $\equiv\text{C-H}$ ), 3.61 (6 H, s,  $\text{O-CH}_3$ ).  $\delta_{\text{F}}$  ( $\text{CDCl}_3$ ) -79.52, -79.53 (2s,  $\text{CF}_3$ ).  $\delta_{\text{C}\{\text{H}\}}$  ( $\text{CDCl}_3$ ) 53.97 (s,  $\text{O-CH}_3$ ), 70.54 (q,  $^2J_{\text{CF}}$  36 Hz,  $\text{C-CF}_3$ ), 73.09, 78.43 (2s,  $\text{C}(\text{CF}_3)\text{-C}\equiv$ ), 77.16 (s,  $\equiv\text{C-H}$ ), 121.07 (q,  $^1J_{\text{CF}}$  285 Hz,  $\text{CF}_3$ ). MS (DCI/ $\text{CH}_4$ ):  $m/z$  299.0 (M+H). HRMS (DCI/ $\text{CH}_4$ ):  $m/z$  calcd for  $\text{C}_{12}\text{H}_9\text{O}_2\text{F}_6$ : 299.0507, found: 299.0493.

**4,7-dimethoxy-4,7-bis(trifluoromethyl)deca-2,5,8-triyn-1,10-diol (4a).** To a solution of the triyne **1** (0.720 g, 2.41 mmol) in THF (20 mL) was added at  $-78\text{ }^\circ\text{C}$   $n\text{-BuLi}$  (2.2 mL, 5.50 mmol). The resulting mixture was stirred 10 min at  $-78\text{ }^\circ\text{C}$  and 1 h at room temperature. This solution was added to a suspension of  $p$ -formaldehyde (0.220 g, 7.3 mmol) in THF (5 mL) under stirring at  $-78\text{ }^\circ\text{C}$ . The reaction mixture was allowed to warm slowly up to room temperature and the stirring was maintained overnight before treatment with saturated aqueous  $\text{NH}_4\text{Cl}$ . The aqueous layer was extracted with diethylether, the combined organic layers were washed with brine, dried over  $\text{MgSO}_4$  and evaporated under vacuum. The residue was purified by silicagel chromatography (acetone/pentane 2:8) to finally give the diol **4a** in 60 % yield (0.520 g) as a brown oil.

$\delta_{\text{H}}$  ( $\text{CDCl}_3$ , 400 MHz) 3.04 (2 H, br s,  $\text{OH}$ ), 3.58 (6 H, s,  $\text{O-CH}_3$ ), 4.40 (4 H, s,  $\text{CH}_2\text{-OH}$ ). ( $\text{CDCl}_3$ , 282 MHz)  $\delta_{\text{F}}$  -79.34 (s,  $\text{CF}_3$ ).  $\delta_{\text{C}\{\text{H}\}}$  ( $\text{CDCl}_3$ , 100 MHz) 50.44 (s,  $\text{CH}_2\text{-OH}$ ), 53.90 (s,  $\text{O-CH}_3$ ), 70.71 (q,  $^2J_{\text{CF}}$  36 Hz,  $\text{C-CF}_3$ ), 74.78, 78.56 (2s,  $\text{C}(\text{CF}_3)\text{-C}\equiv$ ), 87.20 (s,  $\equiv\text{C-CH}_2\text{OH}$ ), 121.18 (q,  $^1J_{\text{CF}}$  284 Hz,  $\text{CF}_3$ ). MS (DCI/ $\text{NH}_3$ ) 376.0 (M+ $\text{NH}_4$ ). HRMS (DCI/ $\text{CH}_4$ ):  $m/z$  calcd for  $\text{C}_{14}\text{H}_{11}\text{O}_3\text{F}_6$   $[\text{M-H}_2\text{O+H}]^+$  341.0612, found: 341.0610.

**4,7-dimethoxy-1,10-bis(4-methoxyphenyl)-4,7-bis(trifluoromethyl)deca-2,5,8-triyn-1,10-**

**diol (4b).** To a solution of the triyne **1** (0.63 g, 2.11 mmol) in dry THF (12 mL) under stirring at  $-78\text{ }^{\circ}\text{C}$  was added *n*-BuLi (1.90 mL, 4.75 mmol). The resulting mixture was stirred during 20 min. at  $-78\text{ }^{\circ}\text{C}$  and 50 min. at room temperature, before cooling again at  $-78\text{ }^{\circ}\text{C}$  and adding a solution of the *p*-anisaldehyde (0.64 mL, 5.27 mmol) in THF (2 mL). The reaction mixture was allowed to warm slowly up to room temperature and the stirring was maintained overnight. After treatment with saturated aqueous  $\text{NH}_4\text{Cl}$  and extractions of the aqueous layer with diethylether, the combined organic layers were washed with brine, dried over  $\text{MgSO}_4$  and evaporated to dryness. The residue was purified by flash chromatography (diethylether/pentane 4:6 then 1:1) to finally give **4b** in 71 % yield (0.856 g) as pale yellow oil.

$\delta_{\text{H}}$  ( $\text{CDCl}_3$ , 300 MHz) 2.48 (2 H, br s, OH), 3.57 (6 H, s, O- $\text{CH}_3$ ), 3.80 (6 H, s,  $\text{C}_6\text{H}_4\text{-OCH}_3$ ), 5.48 (2 H, s, CH-OH), 6.90 (4 H, d,  $^3J_{\text{HH}}$  8.6 Hz, *m*- $\text{C}_6\text{H}_4\text{-OCH}_3$ ), 7.42 (4 H, d,  $^3J_{\text{HH}}$  8.6 Hz, *o*- $\text{C}_6\text{H}_5\text{-OCH}_3$ ).  $\delta_{\text{F}}$  ( $\text{CDCl}_3$ , 282 MHz)  $\square$ 79.21 ( $\text{CF}_3$ ).  $\delta_{\text{C}\{\text{H}\}}$  ( $\text{CDCl}_3$ , 63 MHz) 53.97 ( $\text{C}_6\text{H}_4\text{-OCH}_3$ ), 55.24 (O- $\text{CH}_3$ ), 63.79 (CH-OH), 70.81 (q,  $^2J_{\text{CF}}$  36 Hz, C- $\text{CF}_3$ ), 75.66, 78.77, 89.07 (C $\equiv$ C), 114.09 (*m*- $\text{C}_6\text{H}_4\text{-OCH}_3$ ), 121.21 (q,  $^1J_{\text{CF}}$  285 Hz,  $\text{CF}_3$ ), 128.05 (*o*- $\text{C}_6\text{H}_4\text{-OCH}_3$ ), 131.35 (*i*- $\text{C}_6\text{H}_4\text{-OCH}_3$ ), 159.87 (*p*- $\text{C}_6\text{H}_4\text{-OCH}_3$ ). MS (DCI/ $\text{CH}_4$ )  $m/z$  553.1 (M-OH). HRMS (DCI/ $\text{CH}_4$ ):  $m/z$  calcd for  $\text{C}_{28}\text{H}_{24}\text{O}_5\text{F}_6$  (M-OH): 553.1450, found: 553.1423. FT-IR:  $\nu$  3382 (OH), 2853-2959 (Csp<sup>2</sup>-H), 2237 (C $\equiv$ C), 1611 (C=C), 1444-1463 (C=C), 1251 (C-OMe).

**4,7-dimethoxy-1,10-diphenyl-4,7-bis(trifluoromethyl)deca-2,5,8-triyn-1,10-diol (4c).** To a solution of the triyne **1** (0.200 g, 0.67 mmol) in THF (5 mL) under stirring at  $-78\text{ }^{\circ}\text{C}$  was added *n*-BuLi (0.55 mL, 1.37 mmol). The resulting mixture was stirred 30 min at  $-78\text{ }^{\circ}\text{C}$ , and 30 min at room temperature, before adding benzaldehyde (0.14 mL, 1.38 mmol) at  $-78\text{ }^{\circ}\text{C}$ .

The temperature was allowed to warm slowly up to room temperature and the stirring was maintained overnight. After treatment with saturated aqueous  $\text{NH}_4\text{Cl}$ , the aqueous layer was extracted with diethylether and the combined organic layers were washed with brine, dried over  $\text{MgSO}_4$  and evaporated under reduced pressure. The residue was purified by silicagel chromatography (pentane/acetone 9:1 to 6:4) to give the diol **4c** as a yellow oil in 93 % yield (0.32 g).

$\delta_{\text{H}}$  ( $\text{CDCl}_3$ , 400 MHz) 2.37 (2 H, br d,  $^3J_{\text{HH}}$  6.5 Hz, OH), 3.59 (6 H, s, O- $\text{CH}_3$ ), 5.57 (2 H, d,  $^3J_{\text{HH}}$  6.5 Hz, CH-OH), 7.36-7.44 (6 H, m, *m*-, *p*- $\text{C}_6\text{H}_5$ ), 7.54 (4 H, d,  $^3J_{\text{HH}}$  7.2 Hz, *o*- $\text{C}_6\text{H}_5$ ).  $\delta_{\text{F}}$  ( $\text{CDCl}_3$ , 376 MHz) -79.2 ( $\text{CF}_3$ ).  $\delta_{\text{C}\{\text{H}\}}$  ( $\text{CDCl}_3$ , 100 MHz) 54.07 (O- $\text{CH}_3$ ), 64.38 (CH-OH), 70.88 (q,  $^2J_{\text{CF}}$  36 Hz, C- $\text{CF}_3$ ), 76.08, 78.79, 88.72 ( $\text{C}\equiv\text{C}$ ), 121.22 (q,  $^1J_{\text{CF}}$  285 Hz,  $\text{CF}_3$ ), 126.60, 126.63, 128.86 (*o*-, *m*- $\text{C}_6\text{H}_5$ ), 128.92 (*p*- $\text{C}_6\text{H}_5$ ), 139.03 (*i*- $\text{C}_6\text{H}_5$ ).

**4,7-dimethoxy-4,7-bis(trifluoromethyl)deca-2,5,8-triynedial (5a).** To a solution of the diol **4a** (0.300 g, 0.84 mmol) in 1,2-DCE (25 mL) was added IBX (1.17 g, 4.2 mmol). The resulting mixture was refluxed during 6 h and then cooled at 0 °C before filtration over celite. Evaporation of the filtrate gave the dialdehyde **5a** in 93 % yield (0.275 g) as a pale orange-brown oil.

$\delta_{\text{H}}$  ( $\text{CDCl}_3$ , 400 MHz) 3.64 (6 H, s, O- $\text{CH}_3$ ), 9.33 (2 H, s, CHO).  $\delta_{\text{F}}$  ( $\text{CDCl}_3$ , 376 MHz) -78.46 ( $\text{CF}_3$ ).  $\delta_{\text{C}\{\text{H}\}}$  ( $\text{CDCl}_3$ , 100 MHz) 54.72 (s, OCH<sub>3</sub>), 70.95 (q,  $^2J_{\text{CF}}$  36 Hz, C- $\text{CF}_3$ ), 78.31, 81.33, 84.40 ( $\text{C}\equiv\text{C}$ ), 120.65 (q,  $^1J_{\text{CF}}$  286 Hz,  $\text{CF}_3$ ), 174.66 (CHO). MS (DCI/ $\text{CH}_4$ )  $m/z$  355.0 (M+H). HRMS (DCI/ $\text{CH}_4$ ):  $m/z$  calcd for  $\text{C}_{14}\text{H}_9\text{O}_4\text{F}_6$  (M+H): 355.0405, found: 355.0406.

**4,7-dimethoxy-1,10-bis(4-methoxyphenyl)-4,7-bis(trifluoromethyl)deca-2,5,8-triyn-1,10-**



**dione (5b).** To a solution of the diol **4b** (0.66 g, 1.16 mmol) in dry DCM (90 mL), was added MnO<sub>2</sub> (1.01 g, 11.6 mmol) at room temperature. The resulting mixture was stirred 3h and then filtered through celite. The filtrate was evaporated to dryness. The residue was purified by flash chromatography (diethylether/pentane 3:7 then 4:6) to finally give **5b** in 84 % yield (0.550 g) as a pale yellow oil.

$\delta_{\text{H}}$  (CDCl<sub>3</sub>, 300 MHz) 3.72 (6 H, s, O-CH<sub>3</sub>), 3.91 (6 H, s, C<sub>6</sub>H<sub>4</sub>-OCH<sub>3</sub>), 6.99 (4 H, d, <sup>3</sup>J<sub>HH</sub> 8.7 Hz, *m*-C<sub>6</sub>H<sub>4</sub>-OCH<sub>3</sub>), 8.07 (4 H, d, <sup>3</sup>J<sub>HH</sub> 8.7 Hz, *o*-C<sub>6</sub>H<sub>4</sub>-OCH<sub>3</sub>).  $\delta_{\text{F}}$  (CDCl<sub>3</sub>, 282 MHz)  $\square$ 78.56 (CF<sub>3</sub>).  $\delta_{\text{C}\{\text{H}\}}$  (CDCl<sub>3</sub>, 75 MHz) 54.72 (C<sub>6</sub>H<sub>4</sub>-OCH<sub>3</sub>), 55.66 (O-CH<sub>3</sub>), 71.04 (q, <sup>2</sup>J<sub>CF</sub> 36 Hz, C-CF<sub>3</sub>), 78.63, 79.14 ( $\equiv$ C-C-C $\equiv$ ), 84.25 ( $\equiv$ C-C=O), 114.26 (*m*-C<sub>6</sub>H<sub>4</sub>-OCH<sub>3</sub>), 120.95 (q, <sup>1</sup>J<sub>CF</sub> 286 Hz, CF<sub>3</sub>), 129.28 (*o*-C<sub>6</sub>H<sub>4</sub>-OCH<sub>3</sub>), 132.11 (*i*-C<sub>6</sub>H<sub>4</sub>-OCH<sub>3</sub>), 165.23 (*p*-C<sub>6</sub>H<sub>4</sub>-OCH<sub>3</sub>), 174.32 (C=O). MS (DCI/CH<sub>4</sub>) *m/z* 567.1 (M+H). HRMS (DCI/CH<sub>4</sub>) *m/z* calcd for C<sub>28</sub>H<sub>21</sub>O<sub>6</sub>F<sub>6</sub> (M+H): 567.1242, found: 567.1218. IR:  $\nu$  2852-2923 (Csp<sup>2</sup>-H), 1649 (C=O), 1597 (C=C), 1259 (C-OMe).

**4,7-dimethoxy-1,10-diphenyl-4,7-bis(trifluoromethyl)deca-2,5,8-triyn-1,10-dione (5c).**

To a solution of the diol **4c** (0.320 g, 0.63 mmol) in dichloroethane (40 mL) was added IBX (0.882 g, 3.15 mmol). The resulting mixture was stirred under reflux during 24 h and then cooled into an ice bath before filtration through celite. After evaporation of the solvent under reduced pressure, the residue was purified by silicagel chromatography (pentane/diethylether 8:2) to give the expected diketone **5c** as a pale solid in 94 % yield (0.30 g).

$\delta_{\text{H}}$  (CDCl<sub>3</sub>, 400 MHz) 3.73 (6 H, s, O-CH<sub>3</sub>), 7.52-7.56 (4 H, m, *m*-C<sub>6</sub>H<sub>5</sub>), 7.67-7.71 (2 H, m, *p*-C<sub>6</sub>H<sub>5</sub>), 8.11 (4 H, d, <sup>3</sup>J<sub>HH</sub> 7.5 Hz, *o*-C<sub>6</sub>H<sub>5</sub>).  $\delta_{\text{F}}$  (CDCl<sub>3</sub>, 376 MHz) -78.48, -78.49 (CF<sub>3</sub>).  $\delta_{\text{C}\{\text{H}\}}$  (CDCl<sub>3</sub>, 100 MHz) 54.81 (O-CH<sub>3</sub>), 71.11 (q, <sup>2</sup>J<sub>CF</sub> 36 Hz, C-CF<sub>3</sub>), 78.63, 79.87, 84.03 (C $\equiv$ C),

120.96 (q,  $^1J_{\text{CF}}$  286 Hz,  $\text{CF}_3$ ), 128.99, 129.66 (*o*-, *m*- $\text{C}_6\text{H}_5$ ), 135.11 (*p*- $\text{C}_6\text{H}_5$ ), 135.87 (*i*- $\text{C}_6\text{H}_5$ ), 175.95 ( $\text{C}=\text{O}$ ). MS (DCI/ $\text{CH}_4$ )  $m/z$  507.1 (M+H). HRMS (DCI/ $\text{CH}_4$ )  $m/z$  calcd for  $\text{C}_{26}\text{H}_{17}\text{O}_4\text{F}_6$  (M+H): 507.1031, found: 507.1017.

**4,7,13,16-tetramethoxy-1,10-bis(4-methoxyphenyl)-4,7-diphenyl-13,16-bis**

**(trifluoromethyl)cyclooctadeca-2,5,8,11,14,17-hexayne-1,10-diol (7b).** To a solution of triyne **6** (0.139 g, 0.442 mmol) in THF (30 mL) was added *n*-BuLi (0.35 mL, 0.875 mmol) at  $-78^\circ\text{C}$ . The mixture was stirred 20 min at  $-78^\circ\text{C}$  and 30 min at room temperature (solution A). During that time, the triynedione **5b** (0.250 g, 0.442 mmol) was dissolved in THF (30 mL, solution B). The solutions A and B were simultaneously transferred into a 250 mL flask containing 90 mL THF under stirring at  $-78^\circ\text{C}$ . The resulting mixture was allowed to warm slowly up to room temperature and stirring was continued for 15 h. After treatment with saturated aqueous  $\text{NH}_4\text{Cl}$  and extraction with  $\text{Et}_2\text{O}$ , the combined organic layers were washed with brine, dried over  $\text{MgSO}_4$  and concentrated under reduced pressure. The residue was purified by flash chromatography (acetone/DCM/pentane 1:1:8 then 2:2:6) to finally give **7b** in 40 % yield (0.158 g) as pale brown oil.

$\delta_{\text{H}}$  ( $\text{CDCl}_3$ , 300 MHz) 3.39-3.69 (12 H, m,  $\text{O}-\text{CH}_3$ ), 3.80-3.86 (6 H, m,  $\text{C}_6\text{H}_4-\text{OCH}_3$ ), 6.82-7.00 (4 H, m, *m*- $\text{C}_6\text{H}_4-\text{OCH}_3$ ), 7.33-7.50 (6 H, m, *m*-, *p*- $\text{C}_6\text{H}_5$ ), 7.58-7.83 (8 H, m, *o*- $\text{C}_6\text{H}_5$ , *o*- $\text{C}_6\text{H}_4-\text{OCH}_3$ ).  $\delta_{\text{F}}$  ( $\text{CDCl}_3$ , 282 MHz)  $\square$ 79.13-(-78.91) (m,  $\text{CF}_3$ ).  $\delta_{\text{C}\{\text{H}\}}$  ( $\text{CDCl}_3$ , 75 MHz) 53.26-53.44, 53.82-54.21, 55.34-55.38 (m,  $\text{O}-\text{CH}_3$ ), 64.49-64.71 (m,  $\text{C}-\text{OCH}_3$ ), 70.77 (q,  $^2J_{\text{CF}}$  36.0 Hz,  $\text{C}-\text{CF}_3$ ), 71.81-71.94 (m,  $\text{C}-\text{OH}$ ), 74.61-74.82, 78.65-78.86, 82.95-83.30, 84.42-84.56, 85.90-86.32, 88.16-88.95 (m,  $\text{C}\equiv\text{C}$ ), 114.01-114.05 (m, *m*- $\text{C}_6\text{H}_4-\text{OCH}_3$ ), 121.09 (q,  $^1J_{\text{CF}}$  285 Hz,  $\text{CF}_3$ ), 126.27-126.50 (m, *m*- $\text{C}_6\text{H}_5$ ), 127.05-127.18 (m, *o*- $\text{C}_6\text{H}_4-\text{OCH}_3$ ), 128.44-128.55 (m,

*o*-C<sub>6</sub>H<sub>5</sub>), 129.28 (m, *o*-C<sub>6</sub>H<sub>4</sub>-OCH<sub>3</sub>), 128.98-129.22 (m, *p*-C<sub>6</sub>H<sub>5</sub>), 132.01-132.24 (m, *i*-C<sub>6</sub>H<sub>4</sub>-OCH<sub>3</sub>), 139.04-139.30 (m, *i*-C<sub>6</sub>H<sub>5</sub>), 160.16-160.28 (m, *p*-C<sub>6</sub>H<sub>4</sub>-OCH<sub>3</sub>). MS (DCI/CH<sub>4</sub>) *m/z* 881.2 (M+H). HRMS (DCI/CH<sub>4</sub>) *m/z* calcd for C<sub>50</sub>H<sub>39</sub>O<sub>8</sub>F<sub>6</sub> (M+H): 881.2549, found: 881.2552.

**4,7,13,16-tetramethoxy-1,4,7,10-tetraphenyl-13,16-bis(trifluoromethyl)cyclooctadeca-2,5,8,11,14,17-hexayne-1,10-diol (7c).** To a solution of the triyne **6** (0.182 g, 0.581 mmol) in THF (40 mL) at -78 °C was added *n*-BuLi (0.49 mL, 1.22 mmol) and the resulting solution was stirred during 50 min. Then, this mixture and a solution of the diketone **5c** (0.300 g, 0.593 mmol) in THF (40 mL) were simultaneously transferred into a flask containing 120 mL of THF under stirring at -78 °C. The mixture was allowed to warm slowly up to room temperature and the stirring was maintained overnight before treatment with saturated aqueous NH<sub>4</sub>Cl. The aqueous layer was extracted with diethylether and the combined organic layers were washed with brine, dried over MgSO<sub>4</sub> and evaporated under reduced pressure. The residue was purified by silicagel chromatography (diethylether/pentane 2:8) to give the expected pericyclyne **7c** as a white solid in 18 % yield (0.086 g).

$\delta_{\text{H}}$  (CDCl<sub>3</sub>, 400 MHz) 3.38-3.64 (12 H, m, O-CH<sub>3</sub>), 7.35-7.47 (12 H, m, *m*-, *p*-C<sub>6</sub>H<sub>5</sub>), 7.66-7.82 (8 H, m, *o*-C<sub>6</sub>H<sub>5</sub>).  $\delta_{\text{F}}$  (CDCl<sub>3</sub>, 376 MHz)  $\square$ 79.15-( $\square$ 78.90) (m, CF<sub>3</sub>).  $\delta_{\text{C}\{\text{H}\}}$  (CDCl<sub>3</sub>, 100 MHz) 53.26-54.43, 53.82-54.22 (m, O-CH<sub>3</sub>), 64.81-65.04 (m, C-OCH<sub>3</sub>), 70.77 (q, <sup>2</sup>*J*<sub>CF</sub> 36 Hz, C-CF<sub>3</sub>), 71.87-71.97 (m, C-OH), 74.80-75.04, 78.67-78.89, 83.25-83.55, 84.34-84.57, 85.76-86.21, 88.10-88.62 (m, C $\equiv$ C), 114.01-114.05 (m, *m*-C<sub>6</sub>H<sub>4</sub>-OCH<sub>3</sub>), 121.07 (q, <sup>1</sup>*J*<sub>CF</sub> 285 Hz, CF<sub>3</sub>), 125.55-125.68, 126.25-126.43, 128.45-128.59, 128.75-128.82 (4 m, *o*-C<sub>6</sub>H<sub>5</sub>, *m*-C<sub>6</sub>H<sub>5</sub>), 129.12-129.22, 129.31-129.35 (2 m, *p*-C<sub>6</sub>H<sub>5</sub>), 139.74-140.05 (2 m, *i*-C<sub>6</sub>H<sub>5</sub>). MS (DCI/CH<sub>4</sub>)

$m/z$  789.2 (M-OMe), 803.2 (M-OH), 820.2 (M). HRMS (DCI/CH<sub>4</sub>)  $m/z$  calcd for C<sub>48</sub>H<sub>33</sub>O<sub>5</sub>F<sub>6</sub> (M-OH): 803.2232, found: 803.2209.

**4,7,13,16-tetramethoxy-4,7-diphenyl-13,16-bis(trifluoromethyl)-1,10-bis[4-**

**(trifluoromethyl)phenyl]cyclooctadeca-2,5,8,11,14,17-hexayne-1,10-diol (7d).** To a solution of the triyne **1** (0.199 g, 0.668 mmol) in THF (45 mL) was added *n*-BuLi (0.53 mL, 1.33 mmol) at – 78 °C. The mixture was stirred for 15 min at – 78 °C and 75 min at room temperature (solution A). During that time, the triynedione **10d** (0.440 g, 0.668 mmol) was dissolved in THF (45 mL, solution B). The solutions A and B were simultaneously transferred into a 500 mL flask containing 140 mL THF under stirring at – 78 °C. The resulting mixture was allowed to warm slowly up to room temperature and stirring was continued for 17 h. After treatment with saturated aqueous NH<sub>4</sub>Cl and extraction of the aqueous layer with Et<sub>2</sub>O, the combined organic layers were washed with brine, dried over MgSO<sub>4</sub> and concentrated under reduced pressure. The residue was purified by flash chromatography (acetone/pentane 5:95, 1:9 then 2:8) to finally give **7d** in 21 % yield (0.133 g) as a white solid.

$\delta_H$  (CDCl<sub>3</sub>, 300 MHz) 3.39-3.61 (12 H, m, O-CH<sub>3</sub>), 7.61 (6 H, br s, *m*-, *p*-C<sub>6</sub>H<sub>5</sub>), 7.61-7.93 (12 H, m, *o*-, *m*-C<sub>6</sub>H<sub>4</sub>-CF<sub>3</sub>, *o*-C<sub>6</sub>H<sub>5</sub>).  $\delta_F$  (CDCl<sub>3</sub>, 282 MHz)  $\square$ 79.07-( $\square$ 78.90) (m, CF<sub>3</sub>),  $\square$ 62.75 (s, C<sub>6</sub>H<sub>4</sub>-CF<sub>3</sub>).  $\delta_{C\{H\}}$  (CDCl<sub>3</sub>, 75 MHz) 53.27, 53.35, 53.42, 54.08, 54.17 (O-CH<sub>3</sub>), 64.23, 64.21, 64.40, 64.43 (C-OCH<sub>3</sub>), 70.74 (q, <sup>2</sup>*J*<sub>CF</sub> 36 Hz, C-CF<sub>3</sub>), 71.74, 71.82, 71.88 (C-OH), 75.34-75.52, 78.63-78.72, 84.02-84.56, 85.01-85.36, 87.24-87.95 (m, C $\equiv$ C), 121.02 (q, <sup>1</sup>*J*<sub>CF</sub> 285 Hz, CF<sub>3</sub>), 123.74 (q, <sup>1</sup>*J*<sub>CF</sub> 272 Hz, C<sub>6</sub>H<sub>4</sub>-CF<sub>3</sub>), 125.77-126.27 (m, *o*-, *m*-C<sub>6</sub>H<sub>4</sub>-CF<sub>3</sub>, *o*-C<sub>6</sub>H<sub>5</sub>), 128.66 (*m*-C<sub>6</sub>H<sub>5</sub>), 129.32, 129.38 (*p*-C<sub>6</sub>H<sub>5</sub>), 130.26-132.21 (m, *p*-C<sub>6</sub>H<sub>4</sub>-CF<sub>3</sub>) 138.67-

138.99 (m, *i*-C<sub>6</sub>H<sub>5</sub>) 143.50-143.76 (*i*-C<sub>6</sub>H<sub>4</sub>-CF<sub>3</sub>). MS (MALDI-TOF/DCTB) *m/z* 979.3 (M+Na). HRMS (MALDI-TOF/DCTB) *m/z* calcd for C<sub>50</sub>H<sub>39</sub>O<sub>8</sub>F<sub>6</sub> (M+Na): 979.1905 found: 979.1969.

**1,10-bis[4-(9H-carbazol-9-yl)phenyl]-4,7,13,16-tetramethoxy-13,16-diphenyl-4,7-bis(trifluoromethyl)cyclooctadeca-2,5,8,11,14,17-hexayne-1,10-diol (7e).** To a solution of HMDS (0.21 mL, 1 mmol) in THF (15 mL) under stirring at -78 °C was added *n*-BuLi (0.39 mL, 0.98 mmol). The reaction mixture was stirred 30 min at -78 °C before adding a solution of the triyne **1** (0.049 g, 0.164 mmol) in THF (3 mL). The reaction mixture was stirred 30 min at -78 °C and was diluted with THF to 50 mL (volume of r.m.). Then, the reaction mixture and a solution of **10e** (0.140 g, 0.164 mmol) in THF (50 mL) were transferred simultaneously into a 500 mL flask containing THF (300 mL) under stirring at -78°C. The temperature was allowed to increase slowly up to room temperature and the reaction mixture was stirred during 16 h before treatment with saturated aqueous NH<sub>4</sub>Cl. The aqueous layer was extracted with diethylether and the combined organic layers were washed with brine, dried over MgSO<sub>4</sub> and evaporated under reduced pressure. It was not possible to purify this crude mixture.

HRMS-control: HRMS (MALDI-DCTB) *m/z* calcd for C<sub>72</sub>H<sub>48</sub>N<sub>2</sub>O<sub>6</sub>F<sub>6</sub>: 1150.3417, found: 1150.3440.

**1,10-bis[4-(1H-indol-1-yl)phenyl]-4,7,13,16-tetramethoxy-4,7-diphenyl-13,16-bis(trifluoromethyl)cyclooctadeca-2,5,8,11,14,17-hexayne-1,10-diol (7f).** To a solution of HMDS (0.3 mL, 1.4 mmol) in THF (15 mL) under stirring at -78 °C was added *n*-BuLi (0.54 mL, 1.35 mmol). The reaction mixture was stirred 30 minutes at -78 °C before adding a

solution of the triyne **1** (0.067 g, 0.226 mmol) in THF (3 mL). The reaction mixture was stirred 30 minutes at -78 °C and was diluted with THF to 50 mL (volume of r.m.). Then, this solution and a solution of the diketone **10f** (0.170 g, 0.226 mmol) in THF (50 mL) were transferred simultaneously into a 500 mL flask containing THF (300 mL) under stirring at -78°C. The temperature was allowed to increase slowly up to room temperature and the reaction mixture was stirred at room temperature for 16 h before treatment with saturated aqueous NH<sub>4</sub>Cl. The aqueous layer was extracted with diethylether and the combined organic layers were washed with brine, dried over MgSO<sub>4</sub> and evaporated under reduced pressure. The residue was purified by silica gel chromatography (Acetone/Pentane 2:8) to give the [6]pericyclynediol **7f** as a light yellow solid in 38 % yield (90 mg).

mp 84 °C.  $\delta_{\text{H}}$  (CDCl<sub>3</sub>, 400 MHz) 3.43-3.73 (14 H, m, O-CH<sub>3</sub>, OH), 6.72 (2 H, m, *H*3-indole), 7.24-7.97 (28 H, m, all the rest).  $\delta_{\text{F}}$  (CDCl<sub>3</sub>, 376 MHz)  $\square$ 79.37-(-78.86) (m, CF<sub>3</sub>).  $\delta_{\text{C}\{\text{H}\}}$  (CDCl<sub>3</sub>, 100 MHz) 53.25-54.30 (m, O-CH<sub>3</sub>), 64.51-64.63 (m, C-OCH<sub>3</sub>), 70.70 (q, <sup>2</sup>*J*<sub>CF</sub> 36 Hz, C-CF<sub>3</sub>), 71.95 (C-OH), 75.20, 78.87, 83.65, 83.71, 84.53, 85.81 88.15, 88.39 (m, -C≡C-), 104.36 (m, C3-indole), 110.42 (m, C6-indole), 120.70 (*o*-C<sub>6</sub>H<sub>4</sub>-N), 121.11 (q, <sup>1</sup>*J*<sub>CF</sub> 282 Hz, CF<sub>3</sub>) 121.29 (C2-indole), 122.66 (C9-indole), 124.11-124.23 (m, C7-, C8-indole), 126.35-126.47 (m, *o*-C<sub>6</sub>H<sub>5</sub>), 127.09, 127.23, 127.64, 128.67, 129.37, 130.62 (m, *m*-, *p*-C<sub>6</sub>H<sub>5</sub>, *m*-C<sub>6</sub>H<sub>4</sub>-N), 129.53 (C4-indole), 135.72 (C5-indole), 137.79 (m, *i*-C<sub>6</sub>H<sub>4</sub>-N), 139.12 (m, *i*-C<sub>6</sub>H<sub>5</sub>), 140.68 (*p*-C<sub>6</sub>H<sub>4</sub>-N). MS (MALDI-TOF/DCTB) *m/z* 1050.3 (M). HRMS (MALDI-DCTB) *m/z* calcd for C<sub>64</sub>H<sub>44</sub>N<sub>2</sub>O<sub>6</sub>F<sub>6</sub>: 1050.3104, found: 1050.3180.

**4,7,13,16-tetramethoxy-4,7-diphenyl-13,16-bis(trifluoromethyl)-1,10-bis({2-[tris(propan-2-yl)silyl]ethynyl})cyclooctadeca-2,5,8,11,14,17-hexayne-1,10-diol (**7g**)**. To a solution of

the triyne **1** (0.235 g, 0.789 mmol) in THF (52 mL) was added *n*-BuLi (0.63 mL, 1.58 mmol) at  $-78\text{ }^{\circ}\text{C}$ . The mixture was stirred for 15 min at  $-78\text{ }^{\circ}\text{C}$  and 75 min at room temperature (solution A). During that time, diketone **10g** (0.577 g, 0.789 mmol) was dissolved in THF (52 mL, solution B). The solutions A and B were simultaneously transferred into a 500 mL flask containing 160 mL THF under stirring at  $-78\text{ }^{\circ}\text{C}$ . The resulting solution was allowed to warm slowly up to room temperature and stirring was continued for 17 h. After treatment with saturated aqueous  $\text{NH}_4\text{Cl}$  and extraction with diethylether, the combined organic layers were washed with brine, dried over  $\text{MgSO}_4$  and concentrated under reduced pressure. The residue was purified by flash chromatography (acetone/pentane 5:95, 1:9 then 2:8) to finally give **7g** in 21 % yield (0.175 g) as a white solid.

$\delta_{\text{H}}$  ( $\text{CDCl}_3$ , 300 MHz) 1.10-1.14 (42 H, s, Si-CH-CH<sub>3</sub>), 3.49-3.68 (12 H, m, O-CH<sub>3</sub>), 7.39 (6 H, br s, *m*-, *p*-C<sub>6</sub>H<sub>5</sub>), 7.73-7.80 (4 H, m, *o*-C<sub>6</sub>H<sub>5</sub>).  $\delta_{\text{F}}$  ( $\text{CDCl}_3$ , 282 MHz) -79.24-(-78.89) (m, CF<sub>3</sub>).  $\delta_{\text{C}\{\text{H}\}}$  ( $\text{CDCl}_3$ , 75 MHz) 11.01 (s, Si-CH-CH<sub>3</sub>), 18.42 (s, Si-CH-CH<sub>3</sub>), 53.21-53.56, 53.94-54.18 (m, O-CH<sub>3</sub>), 70.71 (q,  $^2J_{\text{CF}}$  36 Hz, C-CF<sub>3</sub>), 71.74-71.87, 72.25-72.55 (m, C-OH, C(OCH<sub>3</sub>)(C<sub>6</sub>H<sub>5</sub>)), 78.36-78.67, 80.43-80.83, 83.18-83.59, 84.14-84.29, 85.51-86.22, 87.17-87.48, 101.53-101.91 (C $\equiv$ C), 121.00 (q,  $^1J_{\text{CF}}$  283 Hz, CF<sub>3</sub>), 126.47-126.56, 128.58 (*o*-, *m*-C<sub>6</sub>H<sub>5</sub>), 129.18-129.24 (m, *p*-C<sub>6</sub>H<sub>5</sub>), 138.97-139.22 (m, *i*-C<sub>6</sub>H<sub>5</sub>). MS (MALDI-TOF/DCTB) *m/z* 1051.5 (M+Na), 1067.5 (M+K). HRMS (MALDI-TOF/DCTB) *m/z* calcd for C<sub>58</sub>H<sub>66</sub>O<sub>6</sub>F<sub>6</sub>NaSi<sub>2</sub> (M+Na): 1051.4200 found: 1051.4163.

#### **4,7,13,16-tetramethoxy-4,7-diphenyl-1,10-bis(2-phenylethynyl)-13,16-bis**

**(trifluoromethyl)cyclooctadeca-2,5,8,11,14,17-hexayne-1,10-diol (**7h**)**. To a solution of HMDS (0.87 mL, 4.12 mmol), in THF (50 mL) at  $-78\text{ }^{\circ}\text{C}$  was added *n*-BuLi (1.6 mL, 4.0

mmol). The resulting mixture was stirred 30 min before adding a solution of the diketone **10h** (0.380 g, 0.67 mmol) in THF (10 mL) at the same temperature. After stirring 30 min at – 78 °C, the solution was diluted by addition of 40 mL of THF, to have a total volume of 100 mL. This reaction mixture, and a solution of the triyne **1** (0.200 g, 0.67 mmol) in THF (100 mL) were transferred simultaneously into a 1 L flask filled with 500 mL of THF under stirring at – 78 °C. The temperature was allowed to warm slowly up to room temperature and the stirring was maintained overnight before treatment with saturated aqueous NH<sub>4</sub>Cl. After evaporation of about 500 mL of THF, the layers were separated, the aqueous one was extracted with diethylether, and the combined organic layers were washed with brine, dried over MgSO<sub>4</sub> and evaporated under reduced pressure. The residue was purified by silicagel chromatography (acetone/pentane 2:8) to give the expected [6]pericyclynediol **7h** as a pale brown solid in 13 % yield (0.080 g).

$\delta_{\text{H}}$  (CDCl<sub>3</sub>, 400 MHz) 3.48-3.69 (14 H, m, O-CH<sub>3</sub>, OH), 7.37-7.40 (12 H, m, *m*-, *p*-C<sub>6</sub>H<sub>5</sub>-C≡C, *m*-, *p*-C<sub>6</sub>H<sub>5</sub>-C-OCH<sub>3</sub>), 7.49-7.52 (4 H, m, *o*-C<sub>6</sub>H<sub>5</sub>-C≡C), 7.75-7.82 (4 H, m, *o*-C<sub>6</sub>H<sub>5</sub>-C-OCH<sub>3</sub>).  $\delta_{\text{F}}$  (CDCl<sub>3</sub>, 376 MHz) -79.06-(-78.78) (m, CF<sub>3</sub>).  $\delta_{\text{C}\{\text{H}\}}$  (CDCl<sub>3</sub>, 75 MHz) 53.34-53.56, 54.07-54.41 (2 m, OCH<sub>3</sub>), 70.85 (q, <sup>2</sup>J<sub>CF</sub> 36 Hz, C-CF<sub>3</sub>), 71.78-71.85, 72.24-72.33 (2 m, C(OCH<sub>3</sub>)(C<sub>6</sub>H<sub>5</sub>), C-OH), 78.51-78.72, 80.60-80.85, 83.73-84.91, 86.17-86.34, 86.55-86.62 (m, C≡C), 121.00 (br s, *i*-C<sub>6</sub>H<sub>5</sub>-C≡C), 121.08 (q, <sup>1</sup>J<sub>CF</sub> 285 Hz, CF<sub>3</sub>), 126.49-126.59, 128.45, 128.59, 129.20-129.26, 129.52 (m, *o*-, *m*-, *p*-C<sub>6</sub>H<sub>5</sub>-C-OCH<sub>3</sub>, *m*-, *p*-C<sub>6</sub>H<sub>5</sub>-C≡C), 132.02 (*o*-C<sub>6</sub>H<sub>5</sub>-C≡C), 138.83-139.27 (m, *i*-C<sub>6</sub>H<sub>5</sub>-C-OCH<sub>3</sub>). MS (DCI/CH<sub>4</sub>) *m/z* 837.2 (M-OMe), 851.2 (M-OH), 869.2 (M+H). HRMS (DCI/CH<sub>4</sub>) *m/z* calcd for C<sub>52</sub>H<sub>35</sub>O<sub>6</sub>F<sub>6</sub> (M+H): 869.2338, found: 869.2362.



**1,10-bis[4-(9*H*-carbazol-9-yl)phenyl]-4,7-dimethoxy-4,7-diphenyldeca-2,5,8-triyn-1,10-dione (10e).** To a solution of **11e** (0.150 g, 0.18 mmol) in DCM (50 mL) at 0 °C was added MnO<sub>2</sub> (0.450 g, 5.3 mmol). The reaction mixture was stirred 1 h at 0 °C and 3 h at room temperature. Then, the reaction mixture was filtered through celite, and the filtrate was evaporated under reduced pressure to give the diketone **10e** as a light solid in 91% yield (0.140 g).

mp 84 °C.  $\delta_{\text{H}}$  (CDCl<sub>3</sub>, 400 MHz) 3.73 (6 H, s, O-CH<sub>3</sub>), 7.34 (4 H, d,  $^3J_{\text{HH}}$  7.8 Hz, *H*8-, *H*12-carbazole), 7.39-7.53 (14 H, m, *m*-, *p*-C<sub>6</sub>H<sub>5</sub>-C(OMe), *H*6-, *H*10-, *H*7-, *H*11-carbazole), 7.70 (4 H, d,  $^3J_{\text{HH}}$  8.2 Hz, *o*-C<sub>6</sub>H<sub>4</sub>-N), 7.89 (4 H, d,  $^3J_{\text{HH}}$  8.0 Hz, *o*-C<sub>6</sub>H<sub>5</sub>-C(OMe)), 8.15 (4 H, d,  $^3J_{\text{HH}}$  7.8 Hz, *H*9-, *H*13-carbazole), 7.70 (4 H, d,  $^3J_{\text{HH}}$  8.2 Hz, *o*-C<sub>6</sub>H<sub>4</sub>-N), 8.33 7.70 (4 H, d,  $^3J_{\text{HH}}$  8.2 Hz, *m*-C<sub>6</sub>H<sub>4</sub>-N).  $\delta_{\text{C}\{\text{H}\}}$  (CDCl<sub>3</sub>, 100 MHz) 54.09 (OCH<sub>3</sub>), 72.23 (C-OCH<sub>3</sub>), 83.58, 84.57, 89.68 (C-C≡C-C), 109.82 (C6-, C10-carbazole), 120.50 (*o*-C<sub>6</sub>H<sub>4</sub>-N), 120.91 (C8-, C12-carbazole), 124.05 (C3-, C4-carbazole), 126.31, 126.37, 126.53 (C9-, C13-, C7-, C11-carbazole, *o*-C<sub>6</sub>H<sub>5</sub>), 128.91 (*m*-C<sub>6</sub>H<sub>5</sub>), 129.66 (*p*-C<sub>6</sub>H<sub>5</sub>), 131.39 (*m*-C<sub>6</sub>H<sub>4</sub>-N), 134.61 (*p*-C<sub>6</sub>H<sub>4</sub>-N), 138.37, 139.95, 143.60 (C2-, C5-carbazole, *i*-C<sub>6</sub>H<sub>5</sub>, *i*-C<sub>6</sub>H<sub>4</sub>-N), 175.71 (C=O). MS (MALDI-TOF/DCTB) *m/z* 852.4 (M). HRMS (MALDI-TOF/DCTB) *m/z* calcd for C<sub>60</sub>H<sub>40</sub>N<sub>2</sub>O<sub>4</sub>: 852.2988, found: 852.2997.

**1,10-bis[4-(1*H*-indol-1-yl)phenyl]-4,7-dimethoxy-4,7-diphenyldeca-2,5,8-triyn-1,10-dione (10f).** To a solution of diol **11f** (0.210 g, 0.28 mmol) in DCM (50 mL) at 0 °C was added MnO<sub>2</sub> (0.720 g, 8.3 mmol). The resulting mixture was stirred 1 h at 0 °C and 3 h at room temperature before filtration through celite. The filtrate was evaporated under reduced pressure to give the diketone **10f** as a light solid in 91 % yield (180 mg).

mp 87 °C.  $\delta_{\text{H}}$  (CDCl<sub>3</sub>, 400 MHz) 3.74 (6 H, s, O-CH<sub>3</sub>), 6.72 (2 H, s, *H*3-indole) 7.28-7.64 (20 H, m, *H*2-, *H*5-, *H*6-, *H*7-, *H*8-indole, *m*-, *p*-C<sub>6</sub>H<sub>5</sub>, *o*-C<sub>6</sub>H<sub>4</sub>-N), 7.73 (2 H, d, <sup>3</sup>*J*<sub>HH</sub> 7.5 Hz, *H*9-indole), 7.91 (4 H, d, <sup>3</sup>*J*<sub>HH</sub> 6.5 Hz, *o*-C<sub>6</sub>H<sub>5</sub>) 8.28 (4 H, d, <sup>3</sup>*J*<sub>HH</sub> 8.2 Hz, *m*-C<sub>6</sub>H<sub>4</sub>-N).  $\delta_{\text{C}\{\text{H}\}}$  (CDCl<sub>3</sub>, 100 MHz) 54.09 (O-CH<sub>3</sub>), 72.26 (C-OCH<sub>3</sub>), 83.65, 84.60, 89.55 (-C≡C-), 105.72 (C3-indole), 110.73 (C6-indole), 121.37 (*o*-C<sub>6</sub>H<sub>4</sub>-N), 121.56, 123.13, 123.17, 124.31 (C2-, C7-, C8-, C9-indole), 126.57 (*o*-C<sub>6</sub>H<sub>5</sub>), 127.21 (*p*-C<sub>6</sub>H<sub>5</sub>), 128.93 (*m*-C<sub>6</sub>H<sub>5</sub>), 129.68 (C4-indole), 131.41 (*m*-C<sub>6</sub>H<sub>4</sub>-N), 133.78 (*i*-C<sub>6</sub>H<sub>4</sub>-N), 135.24 (C5-indole), 138.42 (*i*-C<sub>6</sub>H<sub>5</sub>), 145.08 (*p*-C<sub>6</sub>H<sub>4</sub>-N), 175.66 (C=O). MS (MALDI-TOF/DCTB) *m/z* 752.2 (M). HRMS (MALDI-TOF/DCTB) *m/z* calcd for C<sub>52</sub>H<sub>36</sub>N<sub>2</sub>O<sub>4</sub>: 752.2675, found: 752.2744.

**6,9-dimethoxy-1,6,9,14-tetraphenyltetradeca-1,4,7,10,13-pentayne-3,12-dione (10h).** To a solution of **11h** (0.450 g, 0.78 mmol) in DCM (50 mL) was added MnO<sub>2</sub> (0.680 g, 7.82 mmol) at room temperature. The resulting mixture was stirred for 4 h and then filtered through celite and evaporated under reduced pressure to give the diketone **10h** in 96 % yield (0.430 g) as a light oil.

$\delta_{\text{H}}$  (CDCl<sub>3</sub>, 300 MHz) 3.66 (6 H, s, O-CH<sub>3</sub>), 7.40-7.55 (12 H, m, *m*-, *p*-C<sub>6</sub>H<sub>5</sub>-C≡C, *m*-, *p*-C<sub>6</sub>H<sub>5</sub>-C-OCH<sub>3</sub>), 7.62 (4 H, d, <sup>3</sup>*J*<sub>HH</sub> 6.9 Hz, *o*-C<sub>6</sub>H<sub>5</sub>-C≡C), 7.81 (4 H, d, <sup>3</sup>*J*<sub>HH</sub> 6.3 Hz, *o*-C<sub>6</sub>H<sub>5</sub>-C-OCH<sub>3</sub>).  $\delta_{\text{C}\{\text{H}\}}$  (CDCl<sub>3</sub>, 100 MHz) 54.00 (O-CH<sub>3</sub>), 72.05 (C-OCH<sub>3</sub>), 84.25, 85.47, 87.42, 89.18, 93.15 (C≡C), 119.08 (*i*-C<sub>6</sub>H<sub>5</sub>-C≡C), 126.54, 128.79 (*o*-, *m*-C<sub>6</sub>H<sub>5</sub>-C-OCH<sub>3</sub>, *m*-C<sub>6</sub>H<sub>5</sub>-C≡C), 129.62, 131.59 (*p*-C<sub>6</sub>H<sub>5</sub>-C≡C, *p*-C<sub>6</sub>H<sub>5</sub>-C-OCH<sub>3</sub>), 133.51 (*o*-C<sub>6</sub>H<sub>5</sub>-C≡C), 138.10 (*i*-C<sub>6</sub>H<sub>5</sub>-C-OCH<sub>3</sub>), 159.84 (C=O). MS (DCI/NH<sub>3</sub>) *m/z* 588.2 (M+NH<sub>4</sub>). HRMS (DCI/CH<sub>4</sub>) *m/z* calcd for C<sub>39</sub>H<sub>23</sub>O<sub>3</sub> (M-OMe): 539.1674, found: 539.1663.

**1,10-bis[4-(9*H*-carbazol-9-yl)phenyl]-4,7-dimethoxy-4,7-diphenyldeca-2,5,8-triyn-1,10-diol (11e).** To a solution of 9-(4-bromophenyl)-9*H*-carbazole (0.124 g, 0.385 mmol) in THF (15 mL) under stirring at -78 °C was added *n*-BuLi (147  $\mu$ L, 0.37 mmol). The reaction mixture was stirred during 1 h at -78 °C before adding a solution of the dialdehyde **9** (0.065 g, 0.175 mmol) in THF (3 mL). The temperature was allowed to increase slowly up to -10 °C in 3 h before adding saturated aqueous NH<sub>4</sub>Cl. The aqueous layer was extracted with diethylether and the combined organic layers were washed with brine, dried over MgSO<sub>4</sub> and evaporated under reduced pressure. The residue was purified by silica gel chromatography (EtOAc/Pentane 2:8) to give **11e** as a yellow solid in 32 % yield (0.150 g).

mp 73 °C.  $\delta_{\text{H}}$  (CDCl<sub>3</sub>, 400 MHz) 2.69 (2 H, br s, OH), 3.63 (6 H, s, O-CH<sub>3</sub>), 5.72 (2 H, br s, CH-OH), 7.29-7.47 (18 H, m, *m*-, *p*-C<sub>6</sub>H<sub>5</sub>, H6-, H10-, H7-, H11-, H8-, H12-carbazole), 7.56 (4 H, d, <sup>3</sup>*J*<sub>HH</sub> 7.9 Hz, *o*-C<sub>6</sub>H<sub>4</sub>-N), 7.78 (4 H, d, <sup>3</sup>*J*<sub>HH</sub> 7.9 Hz, *m*-C<sub>6</sub>H<sub>4</sub>-N), 7.87 (4 H, d, <sup>3</sup>*J*<sub>HH</sub> 7.5 Hz, *o*-C<sub>6</sub>H<sub>5</sub>), 8.18 (4 H, d, <sup>3</sup>*J*<sub>HH</sub> 7.7 Hz, H9-, H13-carbazole).  $\delta_{\text{C}\{\text{H}\}}$  (CDCl<sub>3</sub>, 100 MHz) 53.50 (O-CH<sub>3</sub>), 64.19 (C-OH), 72.1 (C-OCH<sub>3</sub>), 84.46, 84.74, 86.70 (C $\equiv$ C), 109.73 (C6-, C10-carbazole), 120.14 (*o*-C<sub>6</sub>H<sub>4</sub>-N), 120.38 (C8-, C12-carbazole), 123.49 (C3-, C4-carbazole), 126.03 (C9-, C13-carbazole), 126.6 (*o*-C<sub>6</sub>H<sub>5</sub>), 127.2 (C7-, C11-carbazole), 128.33 (*m*-C<sub>6</sub>H<sub>4</sub>-N), 128.63 (*m*-C<sub>6</sub>H<sub>5</sub>), 129.20 (*p*-C<sub>6</sub>H<sub>5</sub>), 137.99 (C2-, C5-carbazole) 138.95, 139.59, 140.71 (*i*-C<sub>6</sub>H<sub>5</sub>, *i*-, *p*-C<sub>6</sub>H<sub>4</sub>-N). MS (MALDI-TOF/DCTB) *m/z* 856.3 (M). HRMS (MALDI-TOF/DCTB) *m/z* calcd for C<sub>60</sub>H<sub>44</sub>N<sub>2</sub>O<sub>4</sub>: 856.3301, found: 856.3372.

**1,10-bis[4-(1*H*-indol-1-yl)phenyl]-4,7-dimethoxy-4,7-diphenyldeca-2,5,8-triyn-1,10-diol (11f).** To a solution of 1-(4-bromophenyl)-1*H*-indole (0.690 g, 2.53 mmol) in THF (15 mL) was added *n*-BuLi (0.92 mL, 2.3 mmol) at -78°C. The reaction mixture was stirred 1 h at -78

°C before adding a solution of the dialdehyde **9** (0.380 g, 1.03 mmol) in THF (3mL). The temperature was allowed to increase slowly up to -10 °C in 3 h before treatment with saturated aqueous NH<sub>4</sub>Cl. The aqueous layer was extracted with diethylether and the combined organic layers were washed with brine, dried over MgSO<sub>4</sub> and evaporated under reduced pressure. The residue was purified by silica gel chromatography (EtOAc/Pentane 2:8) to give diol **11f** as yellow solid in 27 % yield (0.210 g).

mp 76 °C.  $\delta_{\text{H}}$  (CDCl<sub>3</sub>, 400 MHz) 2.70 (2 H, br s, OH), 3.60 (6 H, s, O-CH<sub>3</sub>), 5.65 (2 H, s, CH-OH), 6.72 (2 H, s, H3-indole), 7.15-7.74 (24 H, m, H2-, H5-, H6-, H7-, H8-indole, *o*-, *m*-, *p*-C<sub>6</sub>H<sub>5</sub>, *o*-C<sub>6</sub>H<sub>4</sub>-N), 7.84 (4 H, d, <sup>3</sup>J<sub>HH</sub> 7.3 Hz, *m*-C<sub>6</sub>H<sub>4</sub>-N).  $\delta_{\text{C}\{\text{H}\}}$  (CDCl<sub>3</sub>, 100 MHz) 53.47 (O-CH<sub>3</sub>), 64.10 (C-OH), 72.08 (C-OCH<sub>3</sub>), 84.29, 84.71, 86.74 (C≡C), 103.99 (C3-indole), 110.48 (C6-indole), 120.59 (*o*-C<sub>6</sub>H<sub>4</sub>-N), 121.26 (C2-indole), 122.56 (C9-indole), 124.31 (C7-, C8-indole), 126.59 (*o*-C<sub>6</sub>H<sub>5</sub>), 127.78, 128.10, 128.60 (*m*-, *p*-C<sub>6</sub>H<sub>5</sub>, *m*-C<sub>6</sub>H<sub>4</sub>-N), 129.17 (C4-indole), 135.72 (C5-indole), 137.73 (*i*-C<sub>6</sub>H<sub>4</sub>-N), 139.59, 139.98 (*i*-C<sub>6</sub>H<sub>5</sub>, *p*-C<sub>6</sub>H<sub>4</sub>-N). MS (MALDI-TOF/DCTB) *m/z* 756.3 (M). HRMS (MALDI-TOF/DCTB) *m/z* calcd for C<sub>52</sub>H<sub>40</sub>N<sub>2</sub>O<sub>4</sub>Na (M+Na): 779.2886, found: 779.2939.

**6,9-dimethoxy-1,6,9,14-tetraphenyltetradeca-1,4,7,10,13-pentayne-3,12-diol (**11h**)**. To a solution of phenylacetylene (0.30 mL, 2.73 mmol) in THF (5 mL) under stirring at - 78 °C was added *n*-BuLi (1.08 mL, 2.73 mmol). After 45 min, a solution of the dialdehyde **9** (0.40 g, 1.08 mmol) in THF (20 mL) was added at the same temperature. The resulting mixture was stirred at - 78 °C for 1.5 h before treatment with saturated aqueous NH<sub>4</sub>Cl. The separated aqueous layer was extracted with diethylether, and the combined organic layers were washed with brine, dried over MgSO<sub>4</sub> and evaporated under reduced pressure. The residue was

purified by silicagel chromatography (acetone/DCM/Pentane 0.6:2.4:7 to 0.8:3.2:6) to finally give **11h** as a pale oil in 72 % yield (0.450 g).

$\delta_{\text{H}}$  ( $\text{CDCl}_3$ , 400 MHz) 3.43 (2 H, br s, OH), 3.59 (6 H, s, O-CH<sub>3</sub>), 5.48 (2 H, d,  $^3J_{\text{HH}}$  8.0 Hz, CH-OH), 7.30-7.48 (16 H, m, *o*-, *m*-, *p*-C<sub>6</sub>H<sub>5</sub>-C $\equiv$ C, *m*-, *p*-C<sub>6</sub>H<sub>5</sub>-C-OCH<sub>3</sub>), 7.83 (4 H, d,  $^3J_{\text{HH}}$  8.0 Hz, *o*-C<sub>6</sub>H<sub>5</sub>-C-OCH<sub>3</sub>).  $\delta_{\text{C}\{\text{H}\}}$  ( $\text{CDCl}_3$ , 100 MHz) 52.63 (CH-OH), 53.47 (O-CH<sub>3</sub>), 71.95 (C-OCH<sub>3</sub>), 81.42, 84.55, 84.63, 84.77, 85.65 (C $\equiv$ C), 121.88 (*i*-C<sub>6</sub>H<sub>5</sub>-C $\equiv$ C), 126.67, 128.38, 128.56 (*o*-, *m*-C<sub>6</sub>H<sub>5</sub>-C-OCH<sub>3</sub>, *m*-C<sub>6</sub>H<sub>5</sub>-C $\equiv$ C), 128.95, 129.09 (*p*-C<sub>6</sub>H<sub>5</sub>-C-OCH<sub>3</sub>, *p*-C<sub>6</sub>H<sub>5</sub>-C $\equiv$ C), 131.90 (*o*-C<sub>6</sub>H<sub>5</sub>-C $\equiv$ C), 139.47 (*i*-C<sub>6</sub>H<sub>5</sub>-C-OCH<sub>3</sub>). MS (DCI/CH<sub>4</sub>)  $m/z$  557.2 (M-OH). HRMS (DCI/CH<sub>4</sub>)  $m/z$  calcd for C<sub>40</sub>H<sub>29</sub>O<sub>3</sub> (M-OH): 557.2117, found: 557.2124.

**13,16-dimethoxy-1,10-bis(4-methoxyphenyl)-4,7-diphenyl-13,16-bis(trifluoromethyl)cyclooctadeca-1,2,3,7,8,9-hexaen-5,11,14,17-tetrayne (12b)**. To a solution of **7b** (0.073 g, 0.083 mmol) under stirring at – 78 °C in dry diethylether (50 mL) was added SnCl<sub>2</sub> (0.157 g, 0.83 mmol) and then HCl·Et<sub>2</sub>O (0.83 mL, 1.66 mmol). The temperature was allowed to increase slowly up to – 10 °C in 3 h, thus giving a dark green mixture. Then aqueous 1 M NaOH (2.0 mL) was added and the mixture was allowed to warm up to room temperature. The aqueous layer was extracted with diethylether and the organic layer was washed with brine, dried over MgSO<sub>4</sub> and evaporated under reduced pressure. The residue was purified by silica gel chromatography (DCM/pentane 1:9) to give **12b** as dark-red solid in 69 % yield (0.045 g). Few mg of one pure isomer could be isolated.

Characterization of one isolated diastereoisomer. mp (decomp) 187 °C.  $\lambda_{\text{max}}$  (CHCl<sub>3</sub>) 604 ( $\epsilon$  62200 L·mol<sup>-1</sup>·cm<sup>-1</sup>), 442 (53200).  $\delta_{\text{H}}$  ( $\text{CDCl}_3$ , 300 MHz) 3.71 (6 H, s, O-CH<sub>3</sub>), 3.90 (6 H, s, C<sub>6</sub>H<sub>4</sub>-OCH<sub>3</sub>), 7.00 (4 H, d,  $^3J_{\text{HH}}$  8.9 Hz, *m*-C<sub>6</sub>H<sub>4</sub>-OCH<sub>3</sub>), 7.42-7.46 (2 H, m, *p*-C<sub>6</sub>H<sub>5</sub>), 7.51-

7.56 (4 H, m, *m*-C<sub>6</sub>H<sub>5</sub>), 7.73 (4 H, d, <sup>3</sup>*J*<sub>HH</sub> 8.9 Hz, *o*-C<sub>6</sub>H<sub>4</sub>-OCH<sub>3</sub>), 7.92 (4 H, d, <sup>3</sup>*J*<sub>HH</sub> 7.2 Hz, *o*-C<sub>6</sub>H<sub>5</sub>). δ<sub>F</sub> (CDCl<sub>3</sub>, 282 MHz) -78.77 (CF<sub>3</sub>), second diastereoisomer: -78.93 (CF<sub>3</sub>). δ<sub>C{H}</sub> (CDCl<sub>3</sub>, 75 MHz) 54.33 (O-CH<sub>3</sub>), 55.54 (C<sub>6</sub>H<sub>4</sub>-OCH<sub>3</sub>), 71.38 (q, <sup>2</sup>*J*<sub>CF</sub> 35 Hz, C-CF<sub>3</sub>), 85.62, 86.91, 100.32, 102.53, 105.58 (C-C≡C-C), 114.59 (*m*-C<sub>6</sub>H<sub>4</sub>-OCH<sub>3</sub>), 121.55 (q, <sup>1</sup>*J*<sub>CF</sub> 285 Hz, CF<sub>3</sub>), 127.46, 128.94, 128.97, 129.21, 129.47 (*m*-C<sub>6</sub>H<sub>4</sub>-OCH<sub>3</sub>, *o*-, *m*-, *p*-C<sub>6</sub>H<sub>5</sub>), 130.89 (*i*-C<sub>6</sub>H<sub>4</sub>-OCH<sub>3</sub>), 136.67 (*i*-C<sub>6</sub>H<sub>5</sub>), 145.43, 147.37 (C=C=C=C), 160.92 (*p*-C<sub>6</sub>H<sub>4</sub>-OCH<sub>3</sub>). MS (MALDI-TOF/ DCTB) *m/z* 784.3 (M). HRMS (MALDI-TOF/DCTB) *m/z* calcd for C<sub>48</sub>H<sub>30</sub>O<sub>4</sub>F<sub>6</sub>: 784.2048, found: 784.2076.

**13,16-dimethoxy-1,4,7,10-tetraphenyl-13,16-bis(trifluoromethyl)cyclooctadeca-1,2,3,7,8,9-hexaen-5,11,14,17-tetrayne (12c).** To a solution of the pericyclynediol **7c** (0.085 g, 0.103 mmol) in DCM (40 mL) under stirring at -78 °C were added SnCl<sub>2</sub> (0.196 g, 1.03 mmol) and HCl·Et<sub>2</sub>O (1.03 mL, 2.06 mmol). The resulting mixture was allowed to warm slowly up to -10 °C, and then it was removed from the cold bath and stirred during 10 min at room temperature before treatment with aqueous 1 M NaOH (2.06 mL). After filtration through celite, the organic layer was washed 3 times with brine, dried over MgSO<sub>4</sub> and evaporated under reduced pressure. The residue was purified by silicagel chromatography (pentane/diethylether 9:1) to give the expected *carbo*-cyclohexadiene **12c** as a dark violet solid in 20 % yield (0.015 g).

λ<sub>max</sub> (CHCl<sub>3</sub>) 574 (ε 56700 L.mol<sup>-1</sup>.cm<sup>-1</sup>), 420 (44200). δ<sub>H</sub> (CDCl<sub>3</sub>, 300 MHz) 3.70 (6 H, s, O-CH<sub>3</sub>), 7.36-7.56 (12 H, m, *m*-, *p*-C<sub>6</sub>H<sub>5</sub>), 7.77 (4 H, d, <sup>3</sup>*J*<sub>HH</sub> 7.5 Hz, *o*-C<sub>6</sub>H<sub>5</sub>), 7.92 (4 H, d, <sup>3</sup>*J*<sub>HH</sub> 7.6 Hz, *o*-C<sub>6</sub>H<sub>5</sub>). δ<sub>F</sub> (CDCl<sub>3</sub>, 282 MHz) -78.70 (CF<sub>3</sub>). δ<sub>C{H}</sub> (CDCl<sub>3</sub>, 75 MHz) 54.36 (O-CH<sub>3</sub>), 71.40 (q, <sup>2</sup>*J*<sub>CF</sub> 36 Hz, C-CF<sub>3</sub>), 85.43, 87.41, 100.16, 103.13, 107.36 (C-C≡C-C), 121.56 (q, <sup>1</sup>*J*<sub>CF</sub>

285 Hz, CF<sub>3</sub>), 127.53, 127.55 (*m*-C<sub>6</sub>H<sub>5</sub>), 129.00, 129.05 (*o*-C<sub>6</sub>H<sub>5</sub>), 129.52, 129.63 (*p*-C<sub>6</sub>H<sub>5</sub>), 136.28, 136.43 (*i*-C<sub>6</sub>H<sub>5</sub>), 147.94, 148.60 (C=C=C=C). MS (MALDI-TOF/ DCTB) *m/z* 724.2 (M). HRMS (MALDI-TOF/DCTB) *m/z* calcd for C<sub>46</sub>H<sub>26</sub>O<sub>2</sub>F<sub>6</sub>: 724.1837, found: 724.1903.

**13,16-dimethoxy-4,7-diphenyl-13,16-bis(trifluoromethyl)-1,10-bis[4-(trifluoromethyl)phenyl]cyclooctadeca-1,2,3,7,8,9-hexaen-5,11,14,17-tetrayne (12d).** To a solution of the **7d** (0.040 g, 0.042 mmol) under stirring at – 78 °C in dry DCM (20 mL) were added SnCl<sub>2</sub> (0.080 g, 0.42 mmol) and then HCl·OEt<sub>2</sub> (0.42 mL, 0.84 mmol). The temperature was allowed to increase slowly up to – 5 °C, thus giving a red solution. Then aqueous 1 M NaOH (0.92 mL) was added and the mixture was allowed to warm up to room temperature. The aqueous layer was extracted with DCM and the combined organic layers were washed with brine, dried over MgSO<sub>4</sub> and evaporated under reduced pressure. The residue was purified by silica gel chromatography (DCM/pentane 1:9) to give **12d** as a blue solid in 39 % yield (0.014 g). Few mg of one pure isomer could be isolated.

Characterization of one isolated diastereoisomer.  $\lambda_{\max}$  (CHCl<sub>3</sub>) 572 ( $\epsilon$  78300 L.mol<sup>-1</sup>.cm<sup>-1</sup>), 420 (112900).  $\delta_{\text{H}}$  (CDCl<sub>3</sub>, 300 MHz) 3.70 (6 H, s, O-CH<sub>3</sub>), 7.47-7.58 (6 H, m, *m*-, *p*- C<sub>6</sub>H<sub>5</sub>), 7.71 (4 H, d, <sup>3</sup>*J*<sub>HH</sub> 8.1 Hz, *m*-C<sub>6</sub>H<sub>4</sub>-CF<sub>3</sub>), 7.84-7.98 (8 H, m, *o*-C<sub>6</sub>H<sub>5</sub>, *o*-C<sub>6</sub>H<sub>4</sub>-CF<sub>3</sub>).  $\delta_{\text{F}}$  (CDCl<sub>3</sub>, 282 MHz) –78.66 (CF<sub>3</sub>), –62.73 (C<sub>6</sub>H<sub>4</sub>-CF<sub>3</sub>); second diastereoisomer: –78.63 (CF<sub>3</sub>), –62.73 (C<sub>6</sub>H<sub>4</sub>-CF<sub>3</sub>).  $\delta_{\text{C}\{\text{H}\}}$  (CDCl<sub>3</sub>, 75 MHz) 54.42 (O-CH<sub>3</sub>), 71.38 (q, <sup>2</sup>*J*<sub>CF</sub> 36 Hz, C-CF<sub>3</sub>), 84.82, 88.08, 100.53, 101.64, 109.33 (C-C≡C-C), 121.48 (q, <sup>1</sup>*J*<sub>CF</sub> 285 Hz, CF<sub>3</sub>-C(OCH<sub>3</sub>)), 123.84 (q, <sup>1</sup>*J*<sub>CF</sub> 272 Hz, C<sub>6</sub>H<sub>4</sub>-CF<sub>3</sub>), 125.96 (q, <sup>3</sup>*J*<sub>CF</sub> 3.7 Hz, *m*-C<sub>6</sub>H<sub>4</sub>-CF<sub>3</sub>), 127.40, 127.77, 129.23 (*o*-, *m*-C<sub>6</sub>H<sub>5</sub>, *o*-C<sub>6</sub>H<sub>4</sub>-CF<sub>3</sub>), 130.25 (*p*-C<sub>6</sub>H<sub>5</sub>), 130.87 (q, <sup>2</sup>*J*<sub>CF</sub> 33 Hz, *p*-C<sub>6</sub>H<sub>4</sub>-CF<sub>3</sub>), 136.11 (*i*-C<sub>6</sub>H<sub>5</sub>), 139.44 (*i*-C<sub>6</sub>H<sub>4</sub>-CF<sub>3</sub>), 148.85, 149.25 (C=C=C=C). MS (MALDI-TOF/DCTB) *m/z* 860.3 (M).

HRMS (MALDI-TOF/DCTB)  $m/z$  calcd for  $C_{48}H_{24}O_2F_{12}$ : 860.1585, found: 860.1660.

**9-(4-{10-[4-(9*H*-carbazol-9-yl)phenyl]-13,16-dimethoxy-4,7-diphenyl-13,16-bis(trifluoromethyl)cyclooctadeca-1,2,3,7,8,9-hexaen-5,11,14,17-tetrayn-1-yl}phenyl)-9*H*-carbazole (**12e**).**

To a solution of **7e** (not purified) in dry DCM (20 mL) at -78 °C were added  $SnCl_2$  (0.125 g, 0.70 mmol) and then HCl-Et<sub>2</sub>O (0.7 mL, 0.14 mmol). The temperature of the reaction mixture was slowly increased up to -10 °C in 3 h. Then aqueous 1 M NaOH (1.6 mL) was added. The aqueous layer was extracted with DCM and the combined organic layers were washed with brine, dried over  $MgSO_4$  and evaporated under reduced pressure. The residue was purified by silica gel chromatography (EtOAc/Pentane 5:95) to give **12e** (mixture of isomers) as a dark solid in 21% yield (for two steps) (0.022 g). 10 mg of one pure isomer could be separated.

Characterization of one isolated diastereoisomer: mp 92 °C.  $\lambda_{max}$  ( $CHCl_3$ ) 243 ( $\epsilon$  21200  $L \cdot mol^{-1} \cdot cm^{-1}$ ), 417 (9500), 616 (9300). Fluo ( $\lambda_{ex}$  243 nm),  $\lambda_{em}$  427.  $\delta_H$  ( $CDCl_3$ , 400 MHz) 3.78 (6 H, s, O- $CH_3$ ), 7.35 (4 H, m, *H*8-, *H*12-carbazole), 7.43-7.62 (14 H, m, *m*-, *p*- $C_6H_5$ , *H*6-, *H*10-, *H*7-, *H*11-carbazole), 7.73 (4 H, d,  $^3J_{HH}$  8.3 Hz, *o*- $C_6H_4$ -N), 7.96-8.07 (8 H, m, *o*- $C_6H_5$ , *m*- $C_6H_4$ -N), 8.19 (4 H, d,  $^3J_{HH}$  7.5 Hz, *H*9-, *H*13-carbazole).  $\delta_F$  ( $CDCl_3$ , 376 MHz) -78.60 ( $CF_3$ ), second diastereoisomer: -78.72 ( $CF_3$ ).  $\delta_{C\{H\}}$  ( $CDCl_3$ , 100 MHz) 54.09 (O- $CH_3$ ), 73.33 (C-O $CH_3$ ), 81.88, 85.91, 87.75 ( $C\equiv C$ ), 109.89 (*C*6-, *C*10-carbazole), 120.47, 120.51 (*o*- $C_6H_4$ -N, *C*8-, *C*12-carbazole), 123.79 (*C*3-, *C*4-carbazole), 125.53, 126.19, 127.14, 127.71, 128.77, 129.19, 129.87, 130.89 (*C*9-, *C*13-, *C*7-, *C*11-carbazole, *o*-, *m*-, *p*- $C_6H_5$ , *m*- $C_6H_4$ -N,  $CF_3$ ), 135.16, 136.45, 138.86, 140.43 (*p*- $C_6H_4$ -N, *C*2-, *C*5-carbazole, *i*- $C_6H_5$ , *i*- $C_6H_4$ -N), 145.98, 147.63 ( $=C=C=$ ). The very small quadruplet of C- $CF_3$  carbons was not observed. MS



(MALDI-TOF/DCTB)  $m/z$  1054.3 (M). HRMS (MALDI-TOF/DCTB)  $m/z$  calcd for  $C_{70}H_{40}N_2O_4F_6$ : 1054.2994, found: 1054.3030.

**1-(4-{10-[4-(1H-indol-1-yl)phenyl]-13,16-dimethoxy-4,7-diphenyl-13,16-bis**

**(trifluoromethyl)cyclooctadeca-1,2,3,7,8,9-hexaen-5,11,14,17-tetrayn-1-yl}phenyl)-1H-**

**indole (12f).** To a solution of **7f** (0.090 g, 0.085 mmol) in dry DCM (20 mL) at -78 °C were added  $SnCl_2$  (0.163 g, 0.85 mmol) and then  $HCl \cdot Et_2O$  (0.85 mL, 1.7 mmol). The temperature of the reaction mixture was slowly increased up to -10 °C in 3 h. Then aqueous 1 M NaOH (2.0 mL) was added. The aqueous layer was extracted with DCM and the combined organic layers were washed with brine, dried over  $MgSO_4$  and evaporated under reduced pressure. The residue was purified by silica gel chromatography (EtOAc/Pentane 5:95) to give the *carbo*-cylohexadiene **12f** (mixture of isomers) as a dark solid in 44 % yield (0.036 g). 12 mg of one pure isomer could be separated.

Characterization of one isolated diastereoisomer: mp 148 °C.  $\lambda_{max}$  ( $CHCl_3$ ) 243 ( $\epsilon$  9900 L.mol<sup>-1</sup>.cm<sup>-1</sup>), 412 (6200), 615 (7700). Fluo ( $\lambda_{ex}$  348 nm),  $\lambda_{em}$  485; ( $\lambda_{ex}$  243 nm),  $\lambda_{em}$  326, 341, 485.  $\delta_H$  ( $CDCl_3$ , 400 MHz) 3.76 (6 H, s, O- $CH_3$ ), 6.77 (2 H, br s, *H3*-indole), 7.20-7.35 (4 H, m, *H7*-, *H8*-indole), 7.41 (2 H, s, *H2*-indole), 7.37-7.79 (14 H, m, *m*-, *p*- $C_6H_5$ , *m*- $C_6H_4$ -N, *H6*-, *H9*-indole), 7.87-8.02 (8 H, m, *o*- $C_6H_4$ -N, *o*- $C_6H_5$ ).  $\delta_F$  ( $CDCl_3$ , 376 MHz) -78.66 ( $CF_3$ ), second diastereoisomer: -78.83 ( $CF_3$ ).  $\delta_{C\{H\}}$  ( $CDCl_3$ , 100 MHz) 54.44 (O- $CH_3$ ), 85.26, 87.58, 100.71, 102.07, 107.46 ( $C-C \equiv C-C$ ), 104.81 (*C3*-indole), 110.67 (*C6*-indole), 120.92 (*o*- $C_6H_4$ -N), 121.39 (*C2*-indole), 122.82 (*C9*-indole), 124.08 (*C7*-, *C8*-indole), 127.44, 127.65, 128.63, 128.83, 129.14, 130.90 (*m*-, *p*- $C_6H_5$ , *m*- $C_6H_4$ -N), 129.75 (*C4*-indole), 134.26 (*i*- $C_6H_4$ -N), 135.52 (*C5*-indole), 136.45 (*i*- $C_6H_5$ ), 140.68 (*p*- $C_6H_4$ -N), 147.10, 147.92 ( $=C=C=$ ). The small

quadruplet of C-CF<sub>3</sub> carbons could not be detected. MS (MALDI-TOF/DCTB) *m/z* 954.2 (M). HRMS (MALDI-TOF/DCTB) *m/z* calcd for C<sub>62</sub>H<sub>36</sub>N<sub>2</sub>O<sub>2</sub>F<sub>6</sub>: 954.2681, found: 954.2658.

**{2-[13,16-dimethoxy-4,7-diphenyl-13,16-bis(trifluoromethyl)-10-{2-[tris(propan-2-yl)silyl]ethynyl}cyclooctadeca-1,2,3,7,8,9-hexaen-5,11,14,17-tetrayn-1-yl]ethynyl} tris(propan-2-yl)silane (12g).** To a solution of **7g** (0.066 g, 0.064 mmol) under stirring at – 78 °C in dry DCM (20 mL) were added SnCl<sub>2</sub> (0.122 g, 0.65 mmol) and then HCl·OEt<sub>2</sub> (0.62 mL, 1.28 mmol). The temperature was allowed to increase slowly up to – 20 °C, thus giving a brown solution. Then aqueous 1 M NaOH (1.40 mL) was added and the mixture was allowed to warm up to room temperature. The aqueous layer was extracted with DCM and the combined organic layers were washed with brine, dried over MgSO<sub>4</sub> and evaporated under reduced pressure. The residue was purified by silica gel chromatography (DCM/pentane 5:95) to give a pure diastereoisomer of **12g** as a dark-purple solid in 2 % yield (2 mg).

δ<sub>H</sub> (CDCl<sub>3</sub>, 300 MHz) 1.15 (42 H, br s, Si-CH-CH<sub>3</sub>), 3.62 (6 H, s, OCH<sub>3</sub>), 7.43-7.45 (6 H, br d, *m*-, *p*-C<sub>6</sub>H<sub>5</sub>), 7.82-7.85 (4 H, br d, *o*-C<sub>6</sub>H<sub>5</sub>). δ<sub>F</sub> (CDCl<sub>3</sub>, 282 MHz) -78.75 (CF<sub>3</sub>). MS (MALDI-TOF/DCTB) *m/z* 932.4 (M). HRMS (MALDI-TOF/DCTB) *m/z* calcd for C<sub>56</sub>H<sub>58</sub>O<sub>2</sub>F<sub>6</sub>Si<sub>2</sub>: 932.3880, found: 932.3913.

**13,16-dimethoxy-4,7-diphenyl-1,10-bis(2-phenylethynyl)-13,16-bis(trifluoromethyl)cyclooctadeca-1,2,3,7,8,9-hexaen-5,11,14,17-tetrayne (12h).** To a solution of the [6]pericyclynediol **7h** (0.050 g, 0.06 mmol) in DCM (20 mL) under stirring at – 78 °C were added SnCl<sub>2</sub> (0.115 g, 0.60 mmol) and HCl·Et<sub>2</sub>O (0.6 mL, 1.2 mmol). The resulting mixture was stirred 1 h at – 78 °C and then 1 h at room temperature before treatment with 1 M NaOH

(1.2 mL). The separated organic layer was washed with brine, dried over  $\text{MgSO}_4$  and concentrated to a 5 mL volume without going to dryness. This solution was directly deposited on a silicagel chromatography column (DCM/Pentane 2:8 to 5:5). The blue-green fraction corresponding to the two diastereoisomers (two spots on TLC) of the *carbo*-cyclohexadiene **12h** was concentrated under vacuum without going to dryness (product instable in the solid state). The NMR tube was prepared by addition of  $\text{CDCl}_3$  in the DCM/pentane solution of **12h** followed by selective evaporation of the non-deuterated solvents under reduced pressure. The instability of the product did not allow determining a yield for this step.

Mixture of diastereoisomers.  $\lambda_{\text{max}}$  ( $\text{CHCl}_3$ , 300 MHz) 435, 594.  $\delta_{\text{H}}$  ( $\text{CDCl}_3$ ) 3.69, 3.72 (6 H, 2 s, O- $\text{CH}_3$ ), 7.28-7.59 (16 H, m, *o*-, *m*-, *p*- $\text{C}_6\text{H}_5\text{-C}\equiv\text{C}$ , *m*-, *p*- $\text{C}_6\text{H}_5\text{-C}\leq$ ), 7.90-7.92 (4 H, m, *o*- $\text{C}_6\text{H}_5\text{-C}\leq$ ).  $\delta_{\text{F}}$  ( $\text{CDCl}_3$ , 282 MHz) -78.78-(-78.57) (2 s,  $\text{CF}_3$ ).  $\delta_{\text{C}\{\text{H}\}}$  ( $\text{CDCl}_3$ , 75 MHz) 54.34, 54.42 (2 s, O- $\text{CH}_3$ ), 71.27 (q,  $^2J_{\text{CF}}$  35 Hz, C- $\text{CF}_3$ ), 83.24-83.34, 84.13, 85.44, 85.74, 88.50-88.55, 98.42, 101.22-101.26, 108.87 (C- $\text{C}\equiv\text{C}$ -C,  $\text{C}\equiv\text{C}$ - $\text{C}_6\text{H}_5$ ), 121.36 (q,  $^1J_{\text{CF}}$  284 Hz,  $\text{CF}_3$ ), 122.02 (*i*- $\text{C}_6\text{H}_5\text{-C}\equiv\text{C}$ ), 127.73, 128.58, 129.06 (*o*-, *m*- $\text{C}_6\text{H}_5\leq$ , *m*- $\text{C}_6\text{H}_5\text{-C}\equiv\text{C}$ ), 129.62, 130.25 (*p*- $\text{C}_6\text{H}_5\leq$ , *p*- $\text{C}_6\text{H}_5\text{-C}\equiv\text{C}$ ), 131.94 (*o*- $\text{C}_6\text{H}_5\text{-C}\equiv\text{C}$ ), 135.56 (*i*- $\text{C}_6\text{H}_5\leq$ ), 143.56, 153.36 ( $=\text{C}=\text{C}=$ ). MS (MALDI-TOF/DCTB)  $m/z$  772.2 (M). HRMS (MALDI-TOF/DCTB)  $m/z$  calcd for  $\text{C}_{50}\text{H}_{26}\text{O}_2\text{F}_6$ : 772.1837, found: 772.1794.

## 5. Copies of $^1\text{H}$ , $^{13}\text{C}$ and $^{19}\text{F}$ NMR spectra and MS analyses

### 4a. 4,7-dimethoxy-4,7-bis(trifluoromethyl)deca-2,5,8-triyne-1,10-diol.

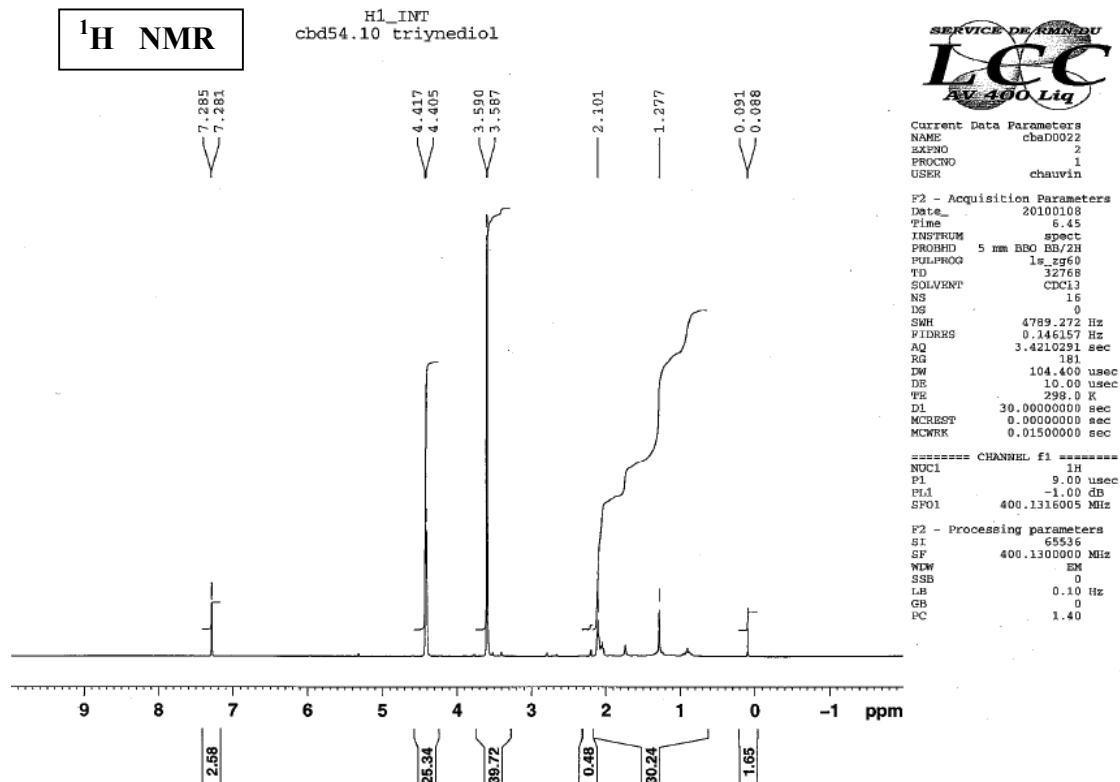

AR227B  
Night\_C13\_DECOUPLE\_H1\_NS\_1024 CDC13 /x/av400pas/data/eq\_d/nmr a.rives 39

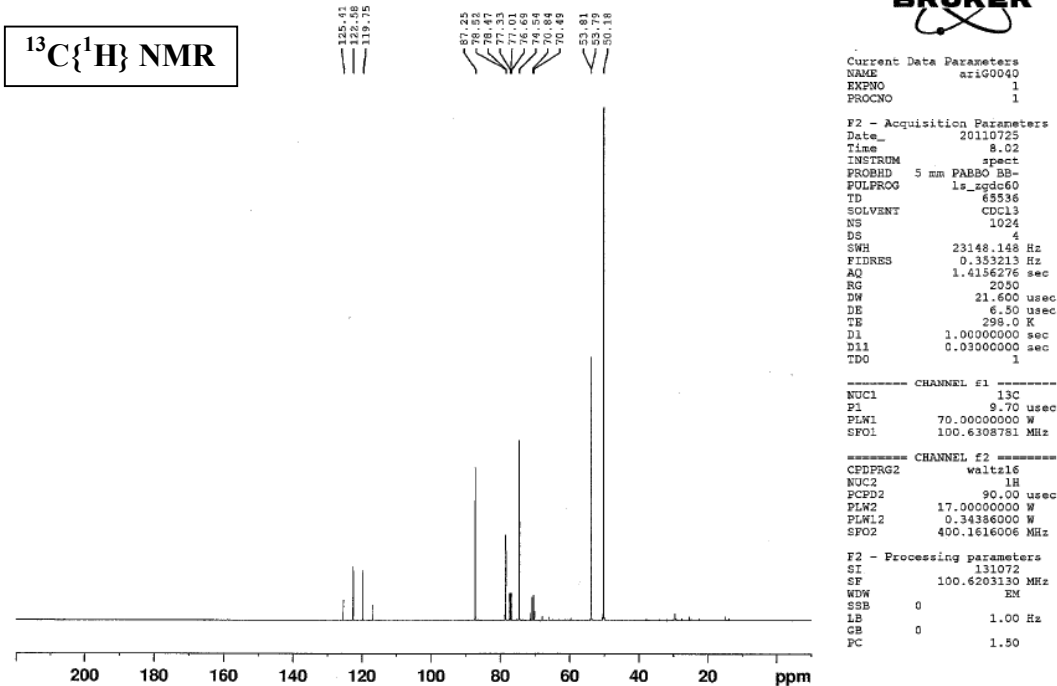

CBd5401 #6-11 RT: 0.15-0.26 AV: 6 NL: 8.12E7  
T: + c Full ms [100.00-800.00]

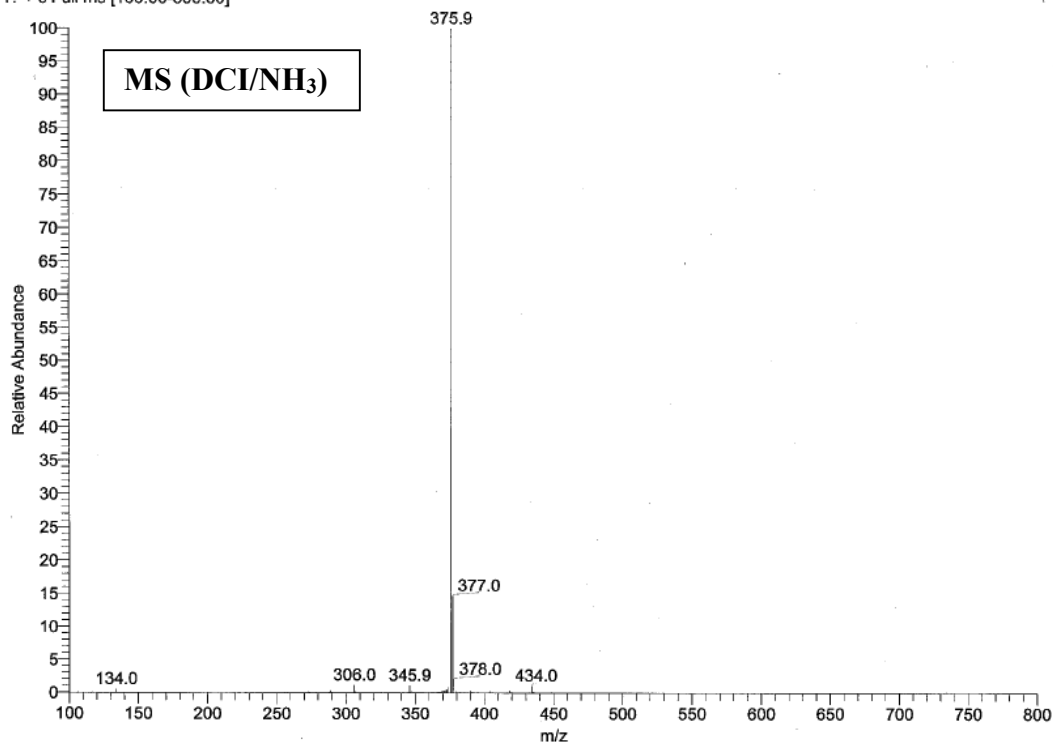

DCI-CH<sub>4</sub>  
20110722-AR227B1 3 (0.083) Cm (3.8-29x5.000)

GCT Premier CAB109

22-Jul-2011 15:09:00  
TOF MS CH<sup>+</sup>  
3.61e+004

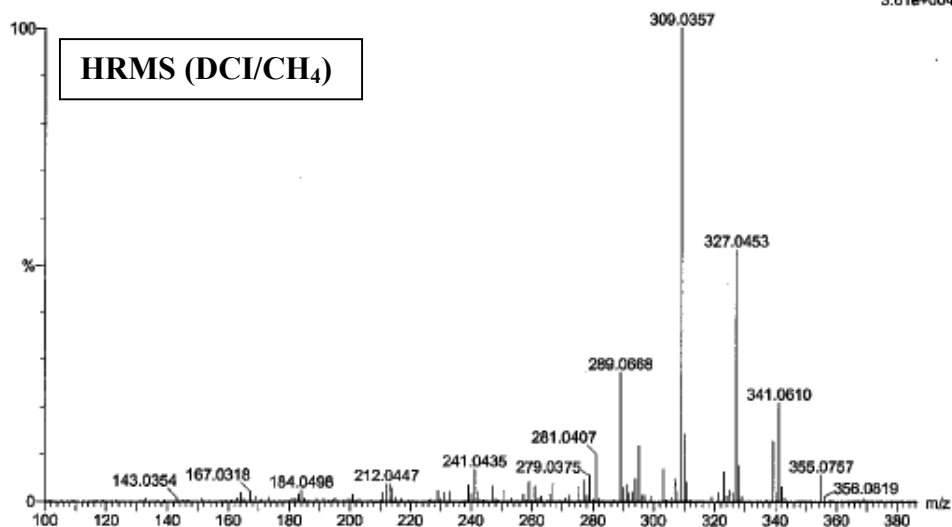

Minimum: 5.00  
Maximum: 100.00

| Mass     | RA    | Calc. Mass | mDa  | PPM  | DBE  | i-FIT | Formula |     |        |
|----------|-------|------------|------|------|------|-------|---------|-----|--------|
| 341.0610 | 20.79 | 341.0612   | -0.2 | -0.6 | 6.5  | 40.0  | F3      | C14 | H11 O3 |
|          |       | 341.0601   | 0.9  | 2.6  | 10.5 | 68.0  | F6      | C17 | H10 O2 |
|          |       | 341.0625   | -1.5 | -4.4 | 13.5 | 98.4  | F5      | C19 | H11 O4 |
|          |       | 341.0614   | -0.4 | -1.2 | 17.5 | 186.1 | F2      | C22 | H10 O3 |
|          |       | 341.0603   | 0.7  | 2.1  | 21.5 | 297.8 | F       | C25 | H9 O2  |

**4b. 4,7-dimethoxy-1,10-bis(4-methoxyphenyl)-4,7-bis(trifluoromethyl)deca-2,5,8-triyn-1,10-diol**

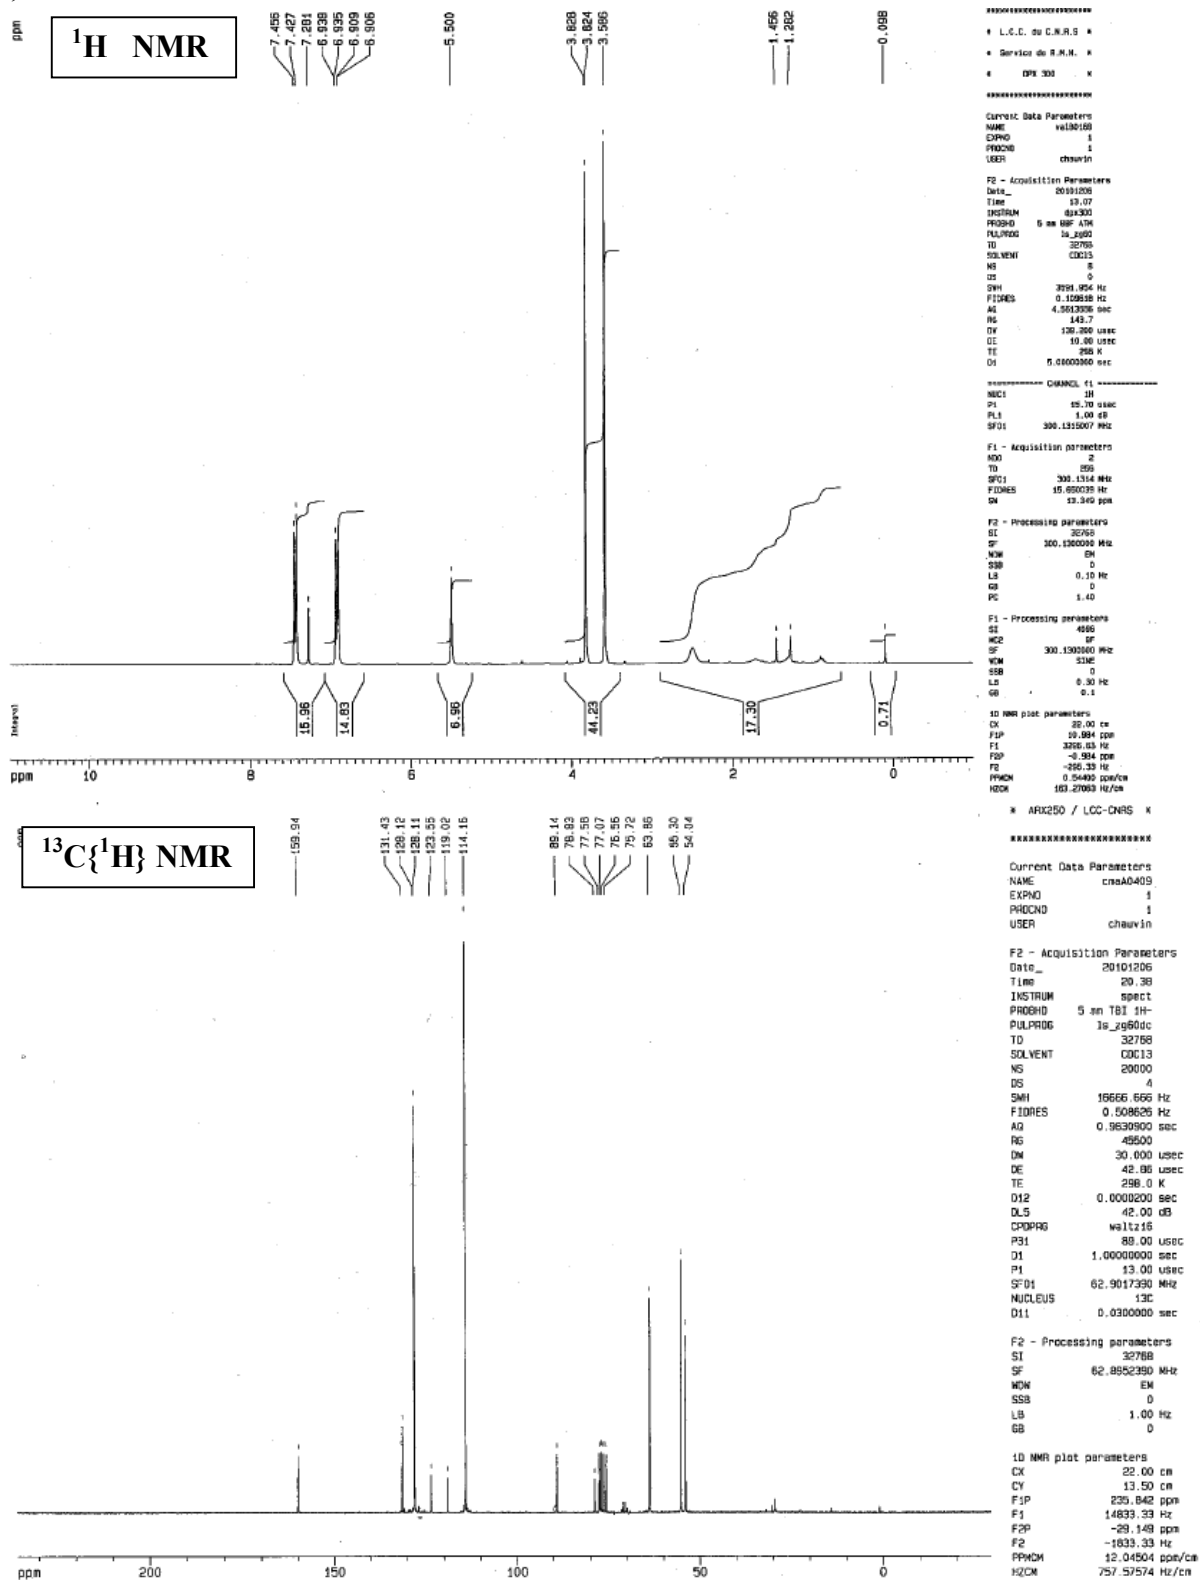

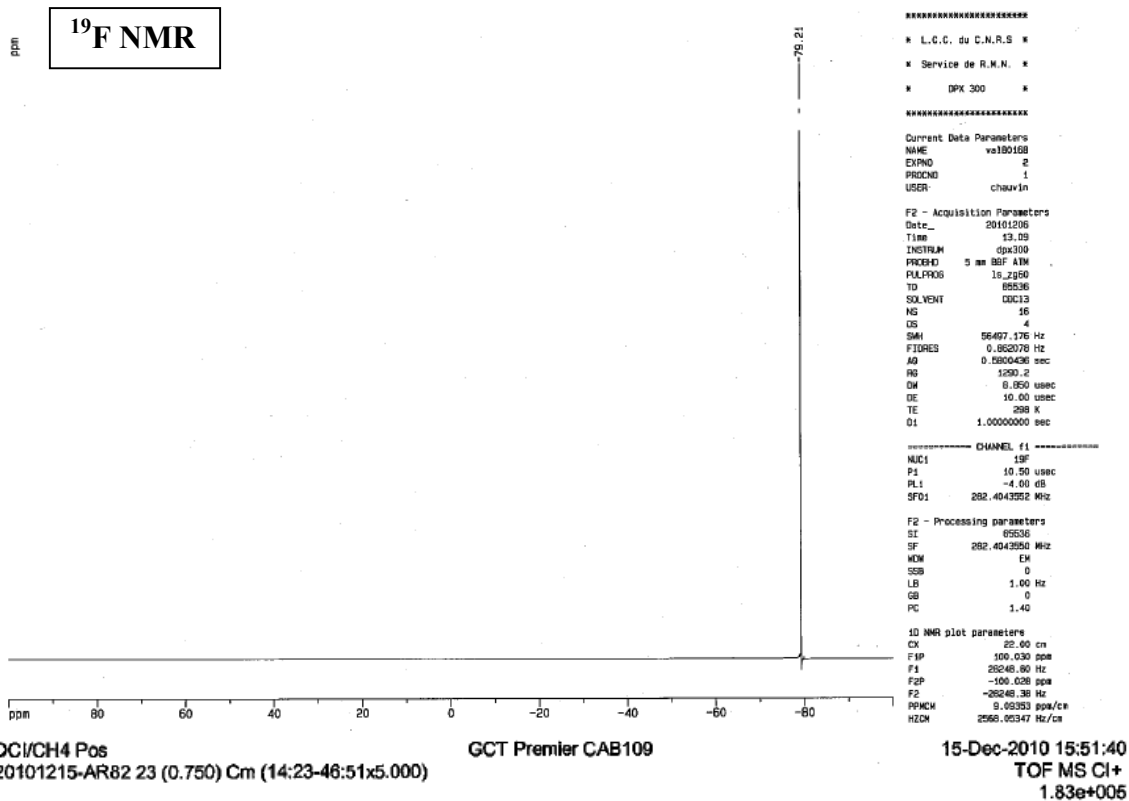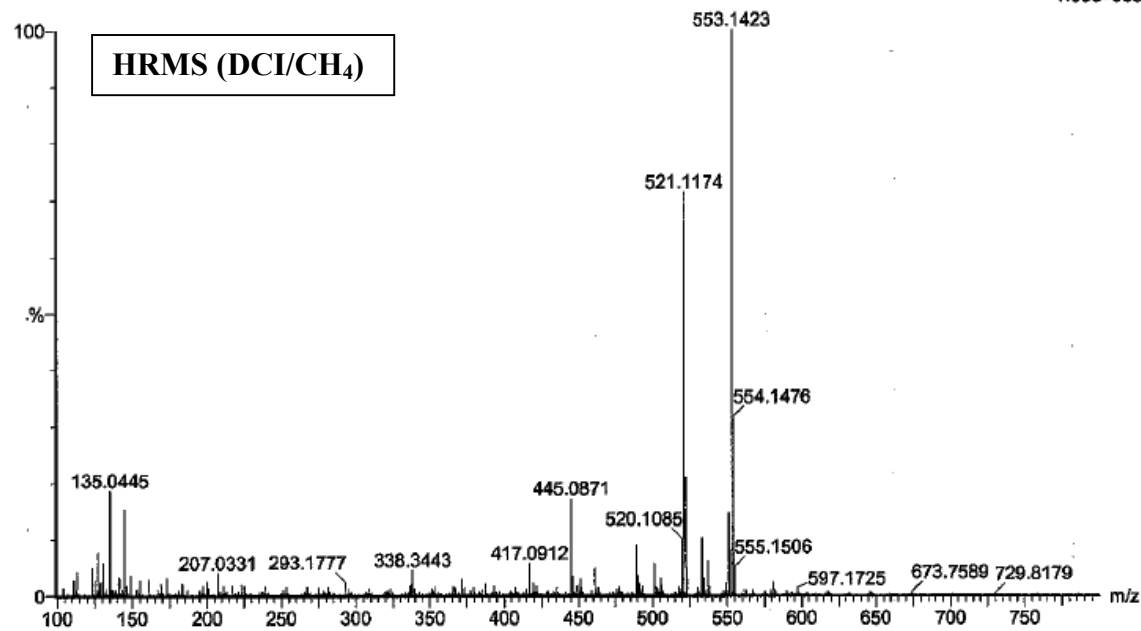

Minimum: -1.5  
Maximum: 10.0 5.0 50.0

| Mass     | Calc. Mass | mDa  | PPM  | DBE  | i-FIT  | Formula |     |    |    |
|----------|------------|------|------|------|--------|---------|-----|----|----|
| 553.1423 | 553.1450   | -2.7 | -4.9 | 14.5 | 164.4  | C28     | H23 | O5 | F6 |
|          | 553.1438   | -1.5 | -2.7 | 18.5 | 705.4  | C31     | H22 | O4 | F5 |
|          | 553.1427   | -0.4 | -0.7 | 22.5 | 1845.1 | C34     | H21 | O3 | F4 |
|          | 553.1415   | 0.8  | 1.4  | 26.5 | 3525.3 | C37     | H20 | O2 | F3 |
|          | 553.1440   | -1.7 | -3.1 | 29.5 | 5593.9 | C39     | H21 | O4 |    |
|          | 553.1404   | 1.9  | 3.4  | 30.5 | 5678.4 | C40     | H19 | O  | F2 |

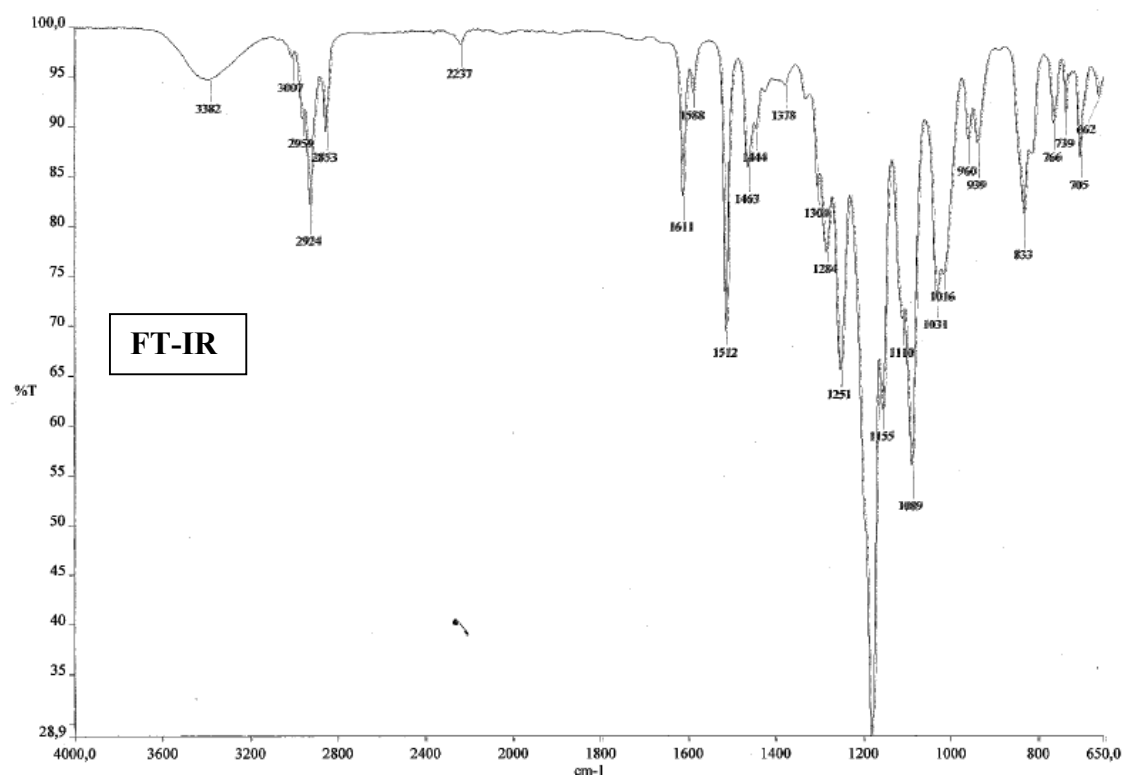

**4c. 4,7-dimethoxy-1,10-diphenyl-4,7-bis(trifluoromethyl)deca-2,5,8-triyn-1,10-diol**

cbd202.12 colonne  
Day\_H1\_int\_NS\_8 CDCl3 /x/av400pas/data/eq\_d/nmr c.barthesd 17

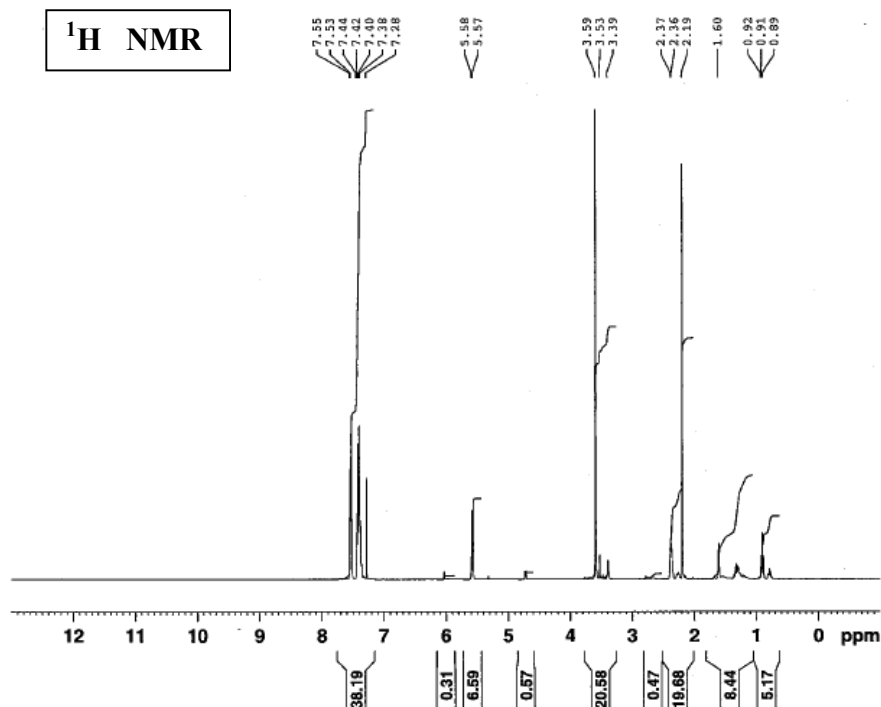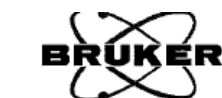

Current Data Parameters  
NAME cbaG0199  
EXPNO 2  
PROCNO 1

F2 - Acquisition Parameters  
Date\_ 20120412  
Time 16.23  
INSTRUM spect  
PROBHD 5 mm PABBO BB-  
PULPROG 1s\_zg60  
TD 65536  
SOLVENT CDCl3  
NS 8  
DS 2  
SWH 5597.015 Hz  
FIDRES 0.085404 Hz  
AQ 5.8545995 sec  
RG 101  
DW 89.333 usec  
DE 6.50 usec  
TE 298.0 K  
D1 20.0000000 sec  
TD0 1

===== CHANNEL f1 =====  
NUC1 1H  
P1 13.60 usec  
PLW1 17.0000000 W  
SFO1 400.1624010 MHz

F2 - Processing parameters  
SI 131072  
SF 400.1600000 MHz  
WDW EM  
SSB 0  
LB 0.10 Hz  
GB 0  
PC 1.50



cbd202.12  
Night\_C13\_DECOUPLE\_H1\_NS\_5000 CDC13 /x/av400pas/data/eq\_d/nmr c.barthesd 17

# <sup>13</sup>C{<sup>1</sup>H} NMR

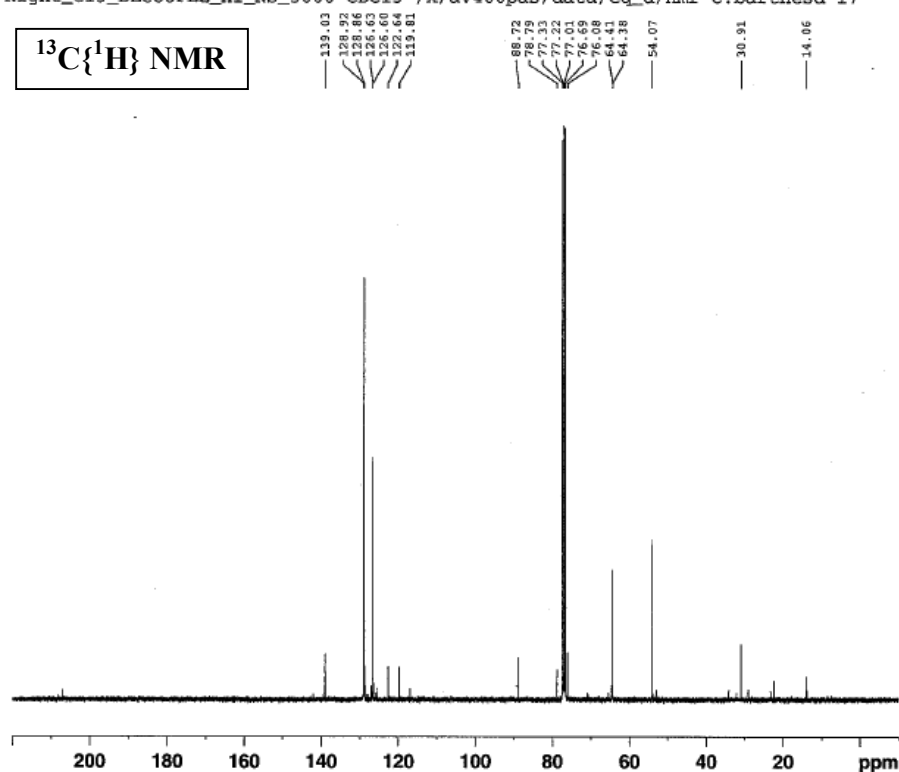

cbd202.12 colonne  
Day\_F19\_NS\_40 CDC13 /x/av400pas/data/eq\_d/nmr c.barthesd 17

# <sup>19</sup>F NMR

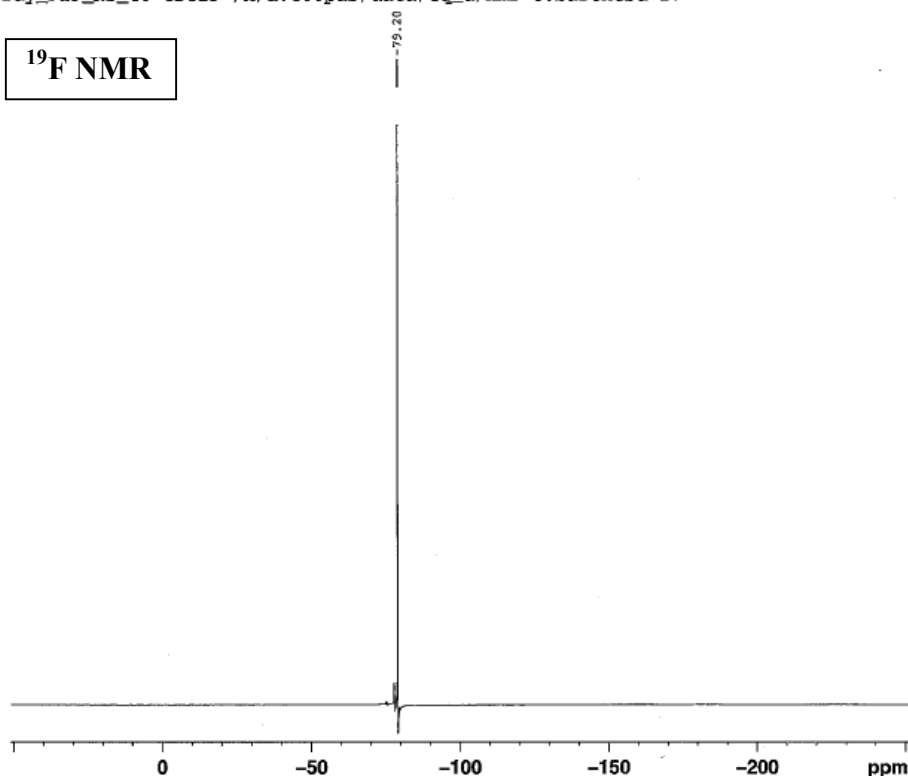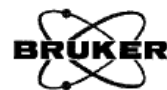

Current Data Parameters  
NAME cbaG0201  
EXPNO 1  
PROCNO 1  
F2 - Acquisition Parameters  
Date\_ 20120413  
Time 1.21  
INSTRUM spect  
PROBHD 5 mm PABBO BB-  
PULPROG 1s\_zgdc60  
TD 65536  
SOLVENT CDC13  
NS 5000  
DS 4  
SWH 23148.148 Hz  
FIDRES 0.353213 Hz  
AQ 1.4156276 sec  
RG 2050  
DW 21.600 usec  
DE 6.50 usec  
TE 298.0 K  
D1 1.00000000 sec  
D11 0.03000000 sec  
TD0 1

===== CHANNEL f1 =====  
NUC1 13C  
P1 9.00 usec  
PLW1 70.00000000 W  
SFO1 100.6308781 MHz

===== CHANNEL f2 =====  
CPDPRG2 waltz16  
NUC2 1H  
PCPD2 90.00 usec  
PLW2 17.00000000 W  
PLW12 0.38819000 W  
SFO2 400.1616006 MHz

F2 - Processing parameters  
SI 131072  
SF 100.6203130 MHz  
WDW EM  
SSB 0  
LB 1.00 Hz  
GB 0  
PC 1.50

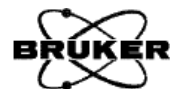

Current Data Parameters  
NAME cbaG0199  
EXPNO 1  
PROCNO 1  
F2 - Acquisition Parameters  
Date\_ 20120412  
Time 16.17  
INSTRUM spect  
PROBHD 5 mm PABBO BB-  
PULPROG 1s\_zg60  
TD 131072  
SOLVENT CDC13  
NS 40  
DS 4  
SWH 113636.367 Hz  
FIDRES 0.866977 Hz  
AQ 0.5767668 sec  
RG 645  
DW 4.400 usec  
DE 6.50 usec  
TE 298.0 K  
D1 1.00000000 sec  
TD0 1

===== CHANNEL f1 =====  
NUC1 19F  
P1 11.65 usec  
PLW1 25.00000000 W  
SFO1 376.4889413 MHz

F2 - Processing parameters  
SI 65536  
SF 376.5265940 MHz  
WDW EM  
SSB 0  
LB 0.30 Hz  
GB 0  
PC 1.00

# **5a. 4,7-dimethoxy-4,7-bis(trifluoromethyl)deca-2,5,8-triynedial**

cbd168.12  
Night\_H1\_int\_NS\_8 CDC13 /x/av400pas/data/eq\_d/nmr c.barthesd 60

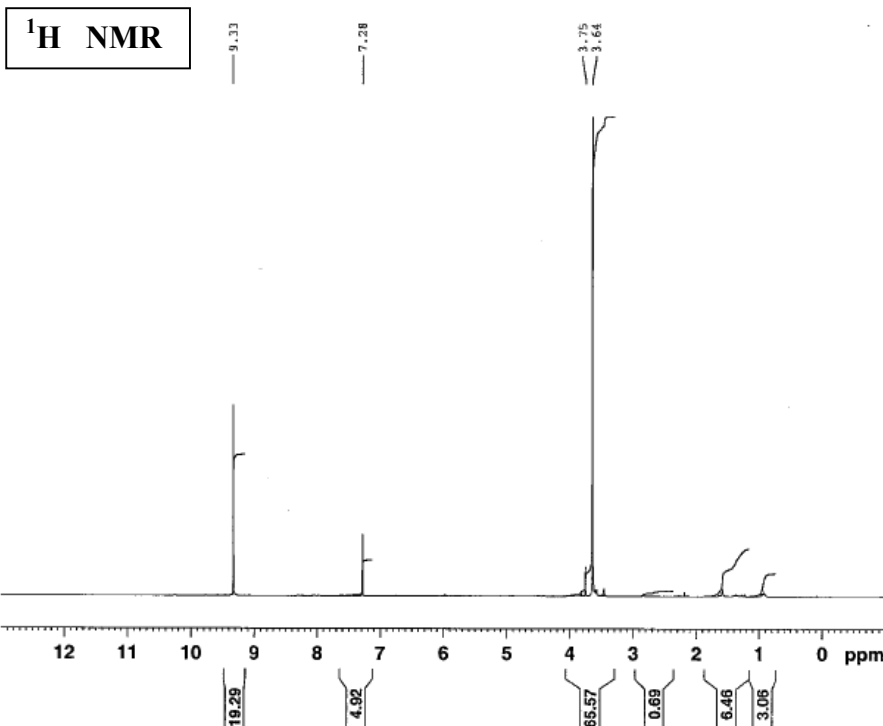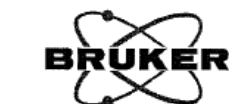

Current Data Parameters  
NAME cba00123  
EXPNO 2  
PROCNO 1

F2 - Acquisition Parameters  
Date\_ 20120228  
Time 19.26  
INSTRUM spect  
PROBHD 5 mm PABBO BB-  
PULPROG ls\_zg60  
TD 65536  
SOLVENT CDCl3  
NS 8  
DS 2  
SWH 5597.015 Hz  
FIDRES 0.085404 Hz  
AQ 5.8545995 sec  
RG 101  
DW 89.333 usec  
DE 6.50 usec  
TE 298.0 K  
D1 20.0000000 sec  
TDO 1

===== CHANNEL f1 =====  
NUC1 1H  
P1 13.60 usec  
PLW1 17.0000000 W  
SFO1 400.1624010 MHz

F2 - Processing parameters  
SI 131072  
SF 400.1600000 MHz  
WDW EM  
SSB 0  
LB 0.10 Hz  
GB 0  
PC 1.50

cbd168.12  
Night\_C13\_DECOUPLE\_H1\_NS\_5000 CDC13 /x/av400pas/data/eq\_d/nmr c.barthesd 60

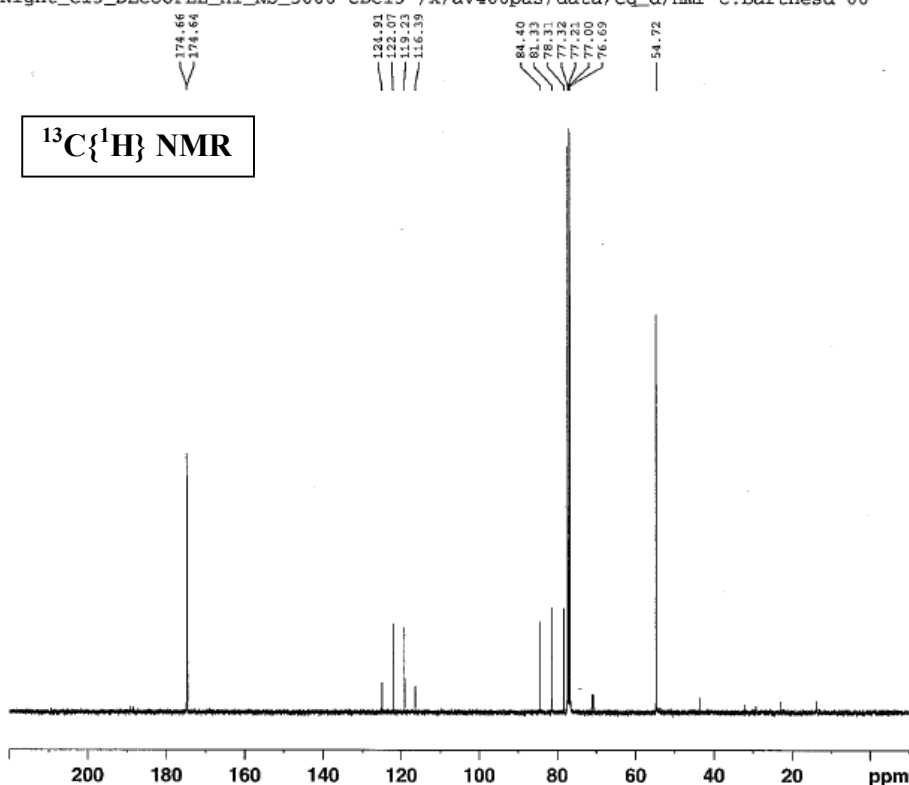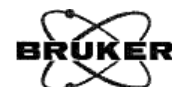

Current Data Parameters  
NAME cba00123  
EXPNO 3  
PROCNO 1

F2 - Acquisition Parameters  
Date\_ 20120228  
Time 22.55  
INSTRUM spect  
PROBHD 5 mm PABBO BB-  
PULPROG ls\_zgdc60  
TD 65536  
SOLVENT CDCl3  
NS 5000  
DS 4  
SWH 23148.148 Hz  
FIDRES 0.353213 Hz  
AQ 1.4156276 sec  
RG 2050  
DW 21.600 usec  
DE 6.50 usec  
TE 298.0 K  
D1 1.00000000 sec  
D11 0.03000000 sec  
TDO 1

===== CHANNEL f1 =====  
NUC1 13C  
P1 9.00 usec  
PLW1 70.0000000 W  
SFO1 100.6308781 MHz

===== CHANNEL f2 =====  
CPDPRG2 waltz16  
NUC2 1H  
PCPD2 90.00 usec  
PLW2 17.00000000 W  
PLW12 0.38819000 W  
SFO2 400.1616006 MHz

F2 - Processing parameters  
SI 131072  
SF 100.6203130 MHz  
WDW EM  
SSB 0  
LB 1.00 Hz  
GB 0  
PC 1.50

cbd168.12  
Night\_F19\_NS\_40 CDCl3 /x/av400pas/data/eq\_d/nmr c.barthesd 60

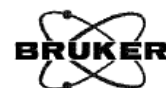

**<sup>19</sup>F NMR**

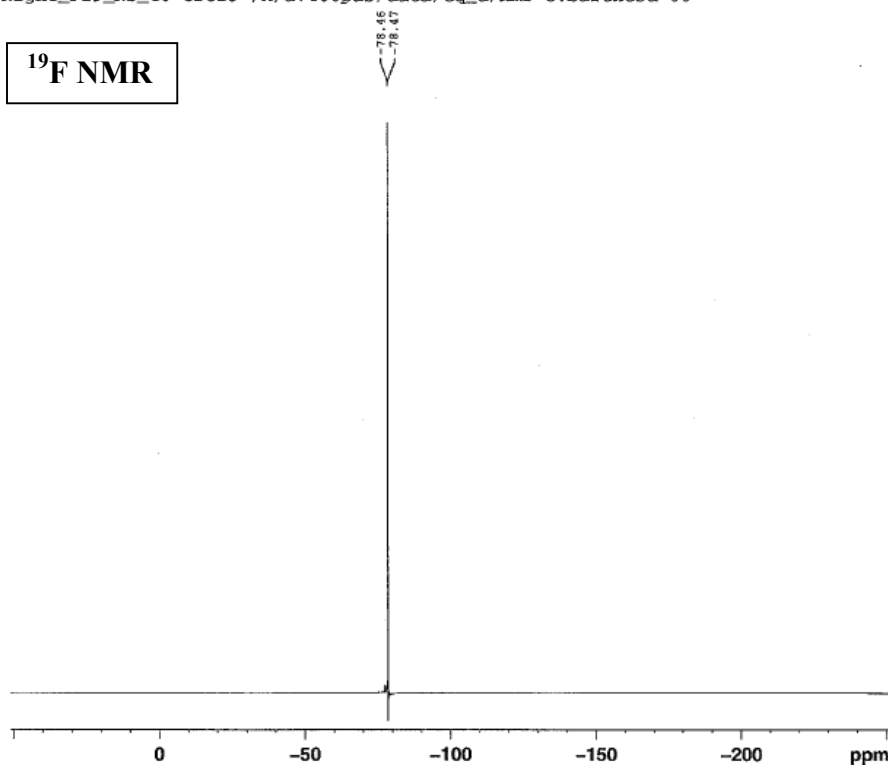

Current Data Parameters  
NAME cba00123  
EXPNO 1  
PROCNO 1

F2 - Acquisition Parameters  
Date\_ 20120228  
Time 19.20  
INSTRUM spect  
PROBHD 5 mm PABBO BB-  
PULPROG 1s\_zg60  
TD 131072  
SOLVENT CDCl3  
NS 40  
DS 4  
SWH 113636.367 Hz  
FIDRES 0.866977 Hz  
AQ 0.5767668 sec  
RG 645  
DW 4.400 usec  
DE 6.90 usec  
TE 298.0 K  
D1 1.0000000 sec  
TD0 1

===== CHANNEL f1 =====  
NUC1 19F  
P1 11.65 usec  
PLW1 25.0000000 W  
SFO1 376.4889413 MHz

F2 - Processing parameters  
SI 65536  
SF 376.5265940 MHz  
WDW EM  
SSB 0  
LB 0.30 Hz  
GB 0  
PC 1.00

DCI-CH4  
20120301-CBD168-12- 6 (0.183) Cm (3:8-19:22x5.000)

GCT Premier CAB109

01-Mar-2012 15:45:34

TOF MS CI+  
5.70e4

**MS (DCI/CH<sub>4</sub>)**

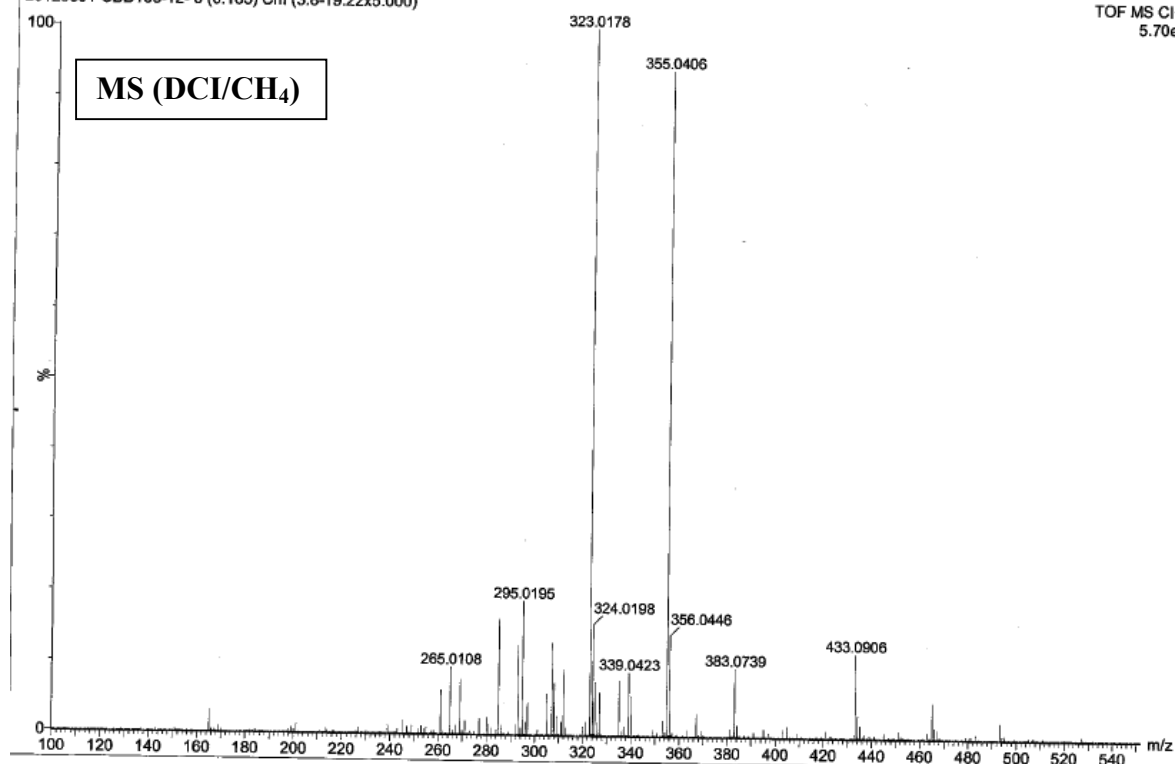

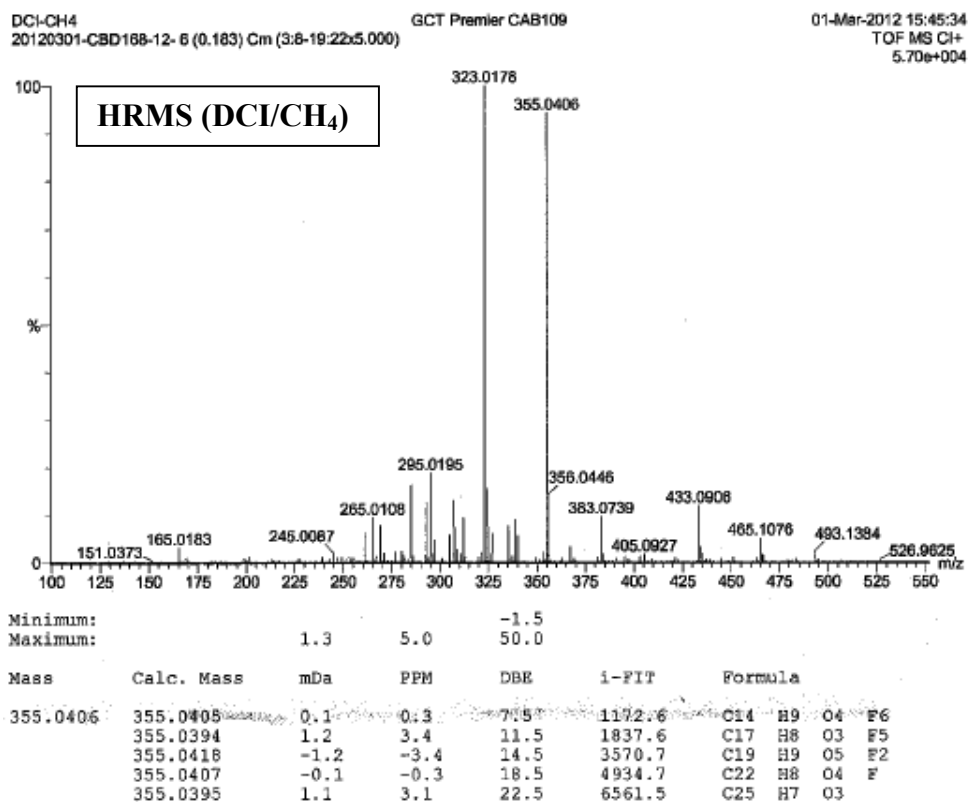

**5b. 4,7-dimethoxy-1,10-bis(4-methoxyphenyl)-4,7-bis(trifluoromethyl)deca-2,5,8-triyn-1,10-dione**

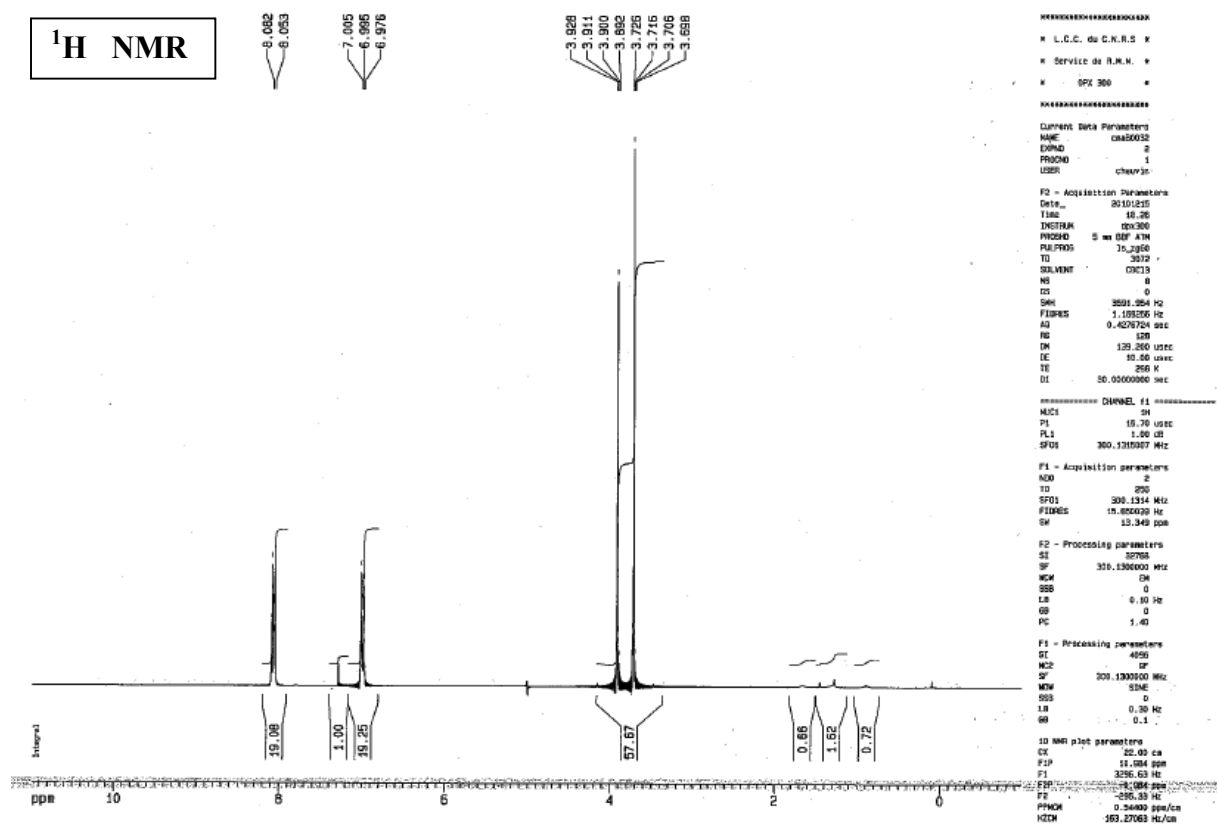

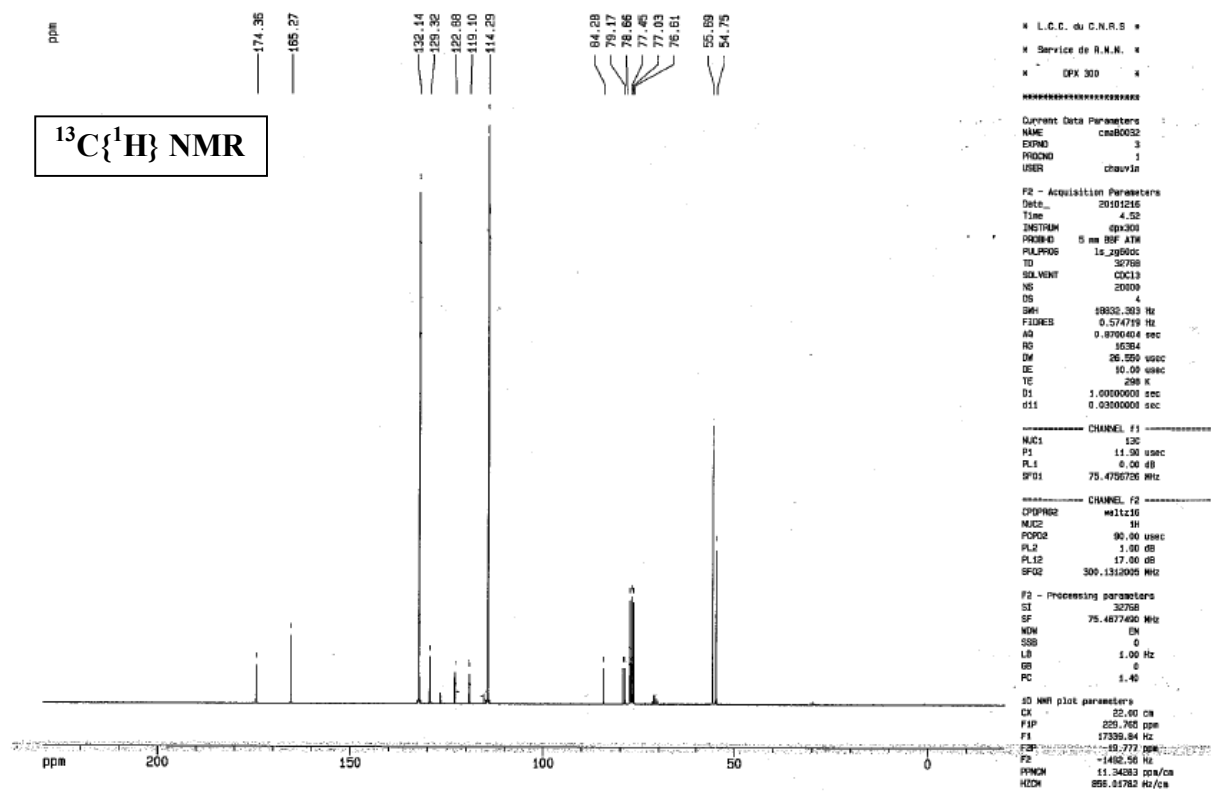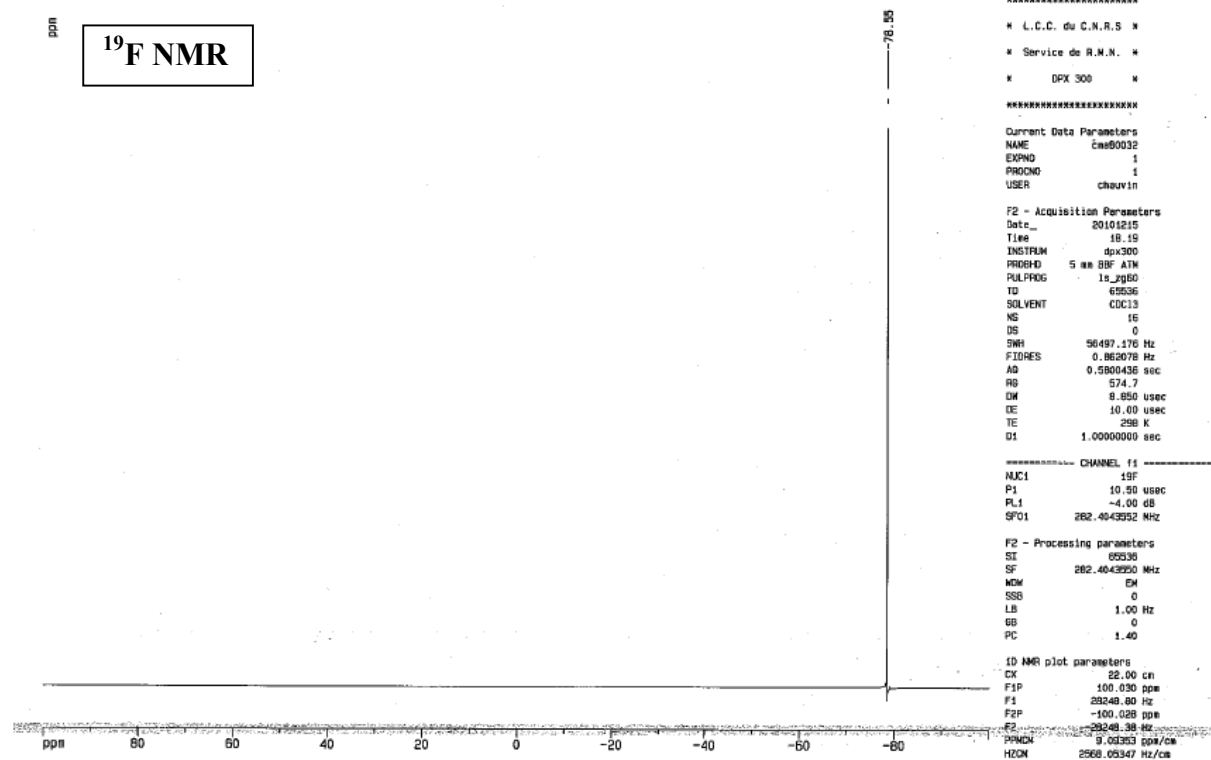

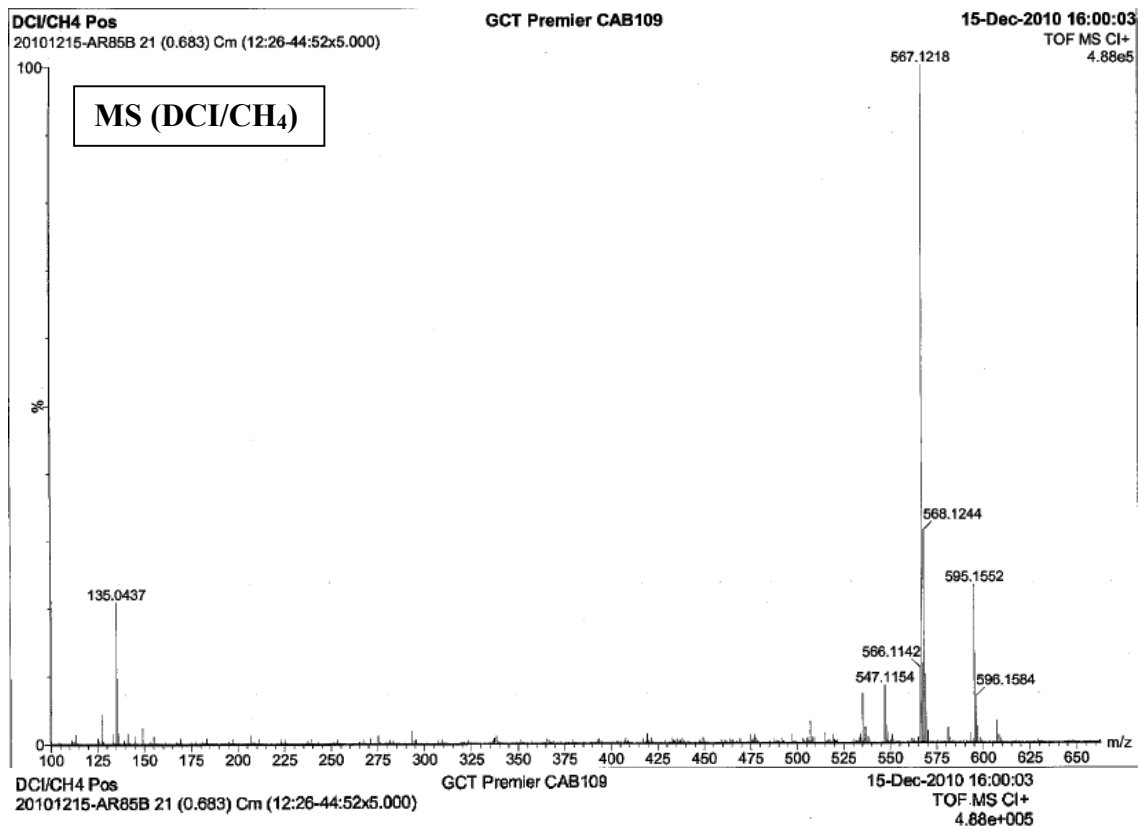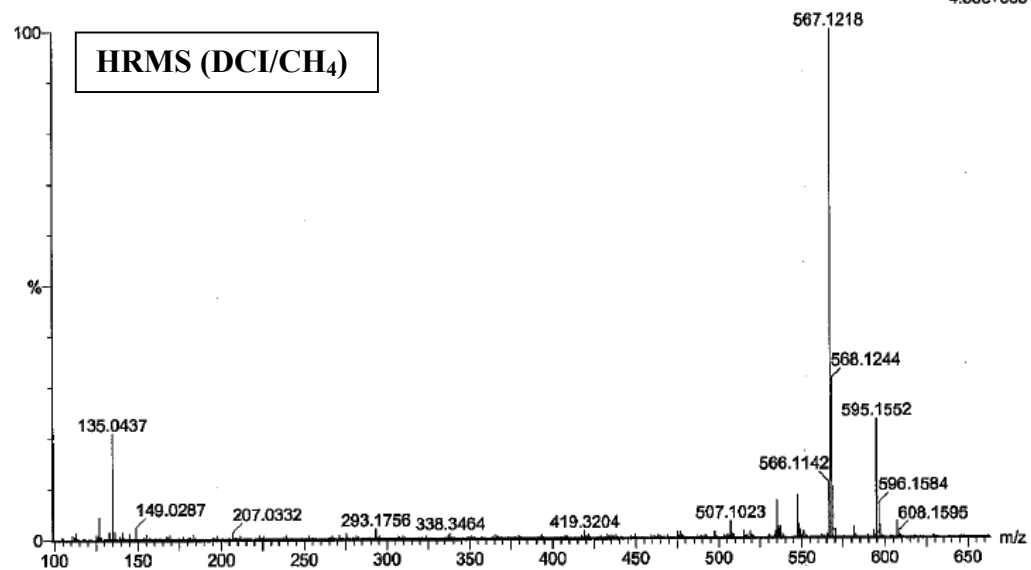

| Minimum: |            |      |      | -1.5 |        |         |     |    |    |
|----------|------------|------|------|------|--------|---------|-----|----|----|
| Maximum: |            | 10.0 | 5.0  | 50.0 |        |         |     |    |    |
| Mass     | Calc. Mass | mDa  | PPM  | DBE  | i-FIT  | Formula |     |    |    |
| 567.1218 | 567.1231   | -1.3 | -2.3 | 19.5 | 3350.8 | C31     | H20 | O5 | F5 |
|          | 567.1242   | -2.4 | -4.2 | 15.5 | 3822.4 | C28     | H21 | O6 | F6 |
|          | 567.1219   | -0.1 | -0.2 | 23.5 | 4145.5 | C34     | H19 | O4 | F4 |
|          | 567.1244   | -2.6 | -4.6 | 26.5 | 5016.9 | C36     | H20 | O6 | F  |
|          | 567.1208   | 1.0  | 1.8  | 27.5 | 6082.6 | C37     | H18 | O3 | F3 |
|          | 567.1232   | -1.4 | -2.5 | 30.5 | 7803.9 | C39     | H19 | O5 |    |
|          | 567.1197   | 2.1  | 3.7  | 31.5 | 9007.5 | C40     | H17 | O2 | F2 |

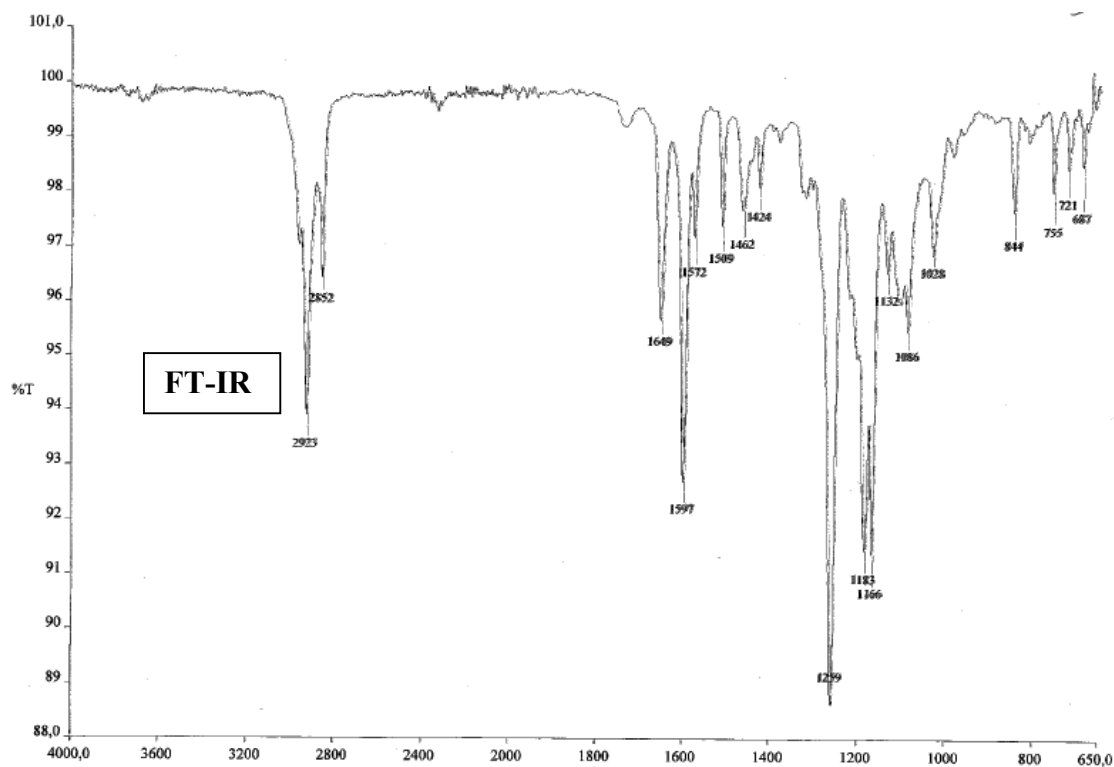

**5c. 4,7-dimethoxy-1,10-diphenyl-4,7-bis(trifluoromethyl)deca-2,5,8-triyn-1,10-dione**

cbd204.12 cetone cf3triyndiphenyle  
Night\_H1\_int\_NS\_8 CDC13 /x/av400pas/data/eq\_d/nmr c.barthesd 47

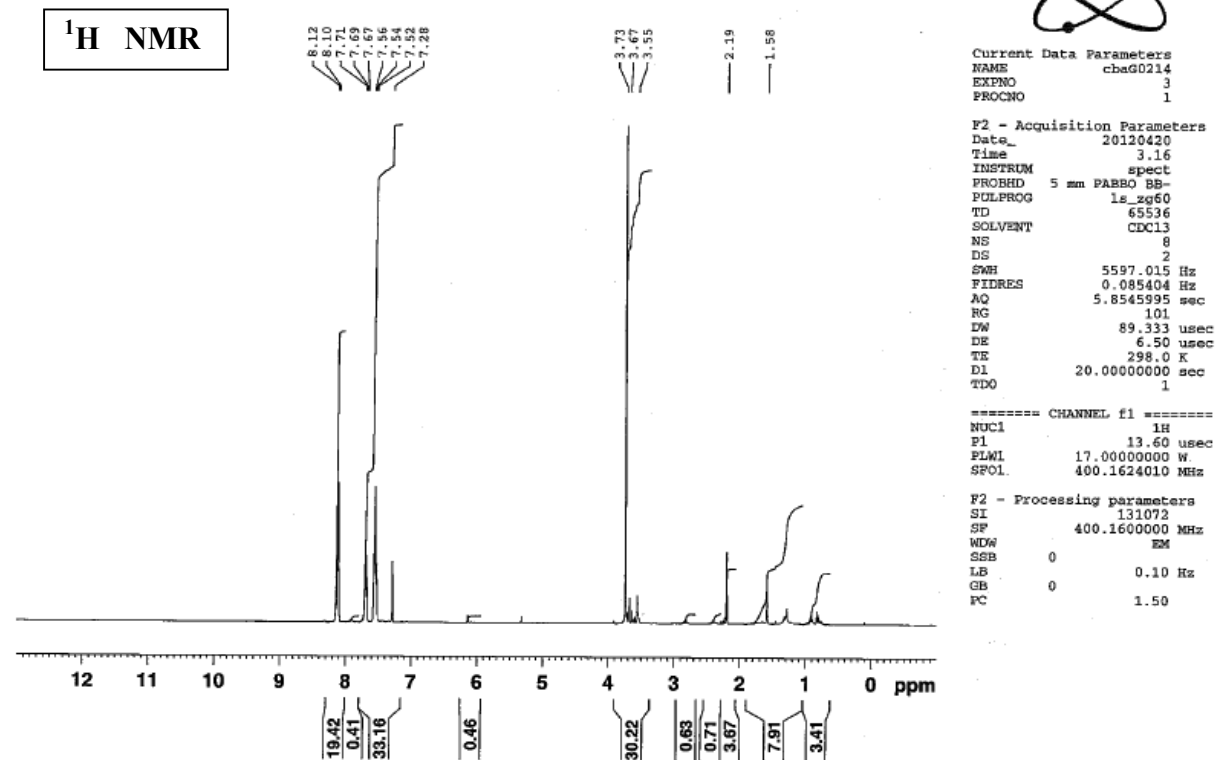

cbd204.12 cetone cf3trienediphenyle  
Night\_C13\_DECOUPLE\_H1\_NS\_5000 CDCl3 /x/av400pas/data/eq\_d/nmr c.barthesd 47

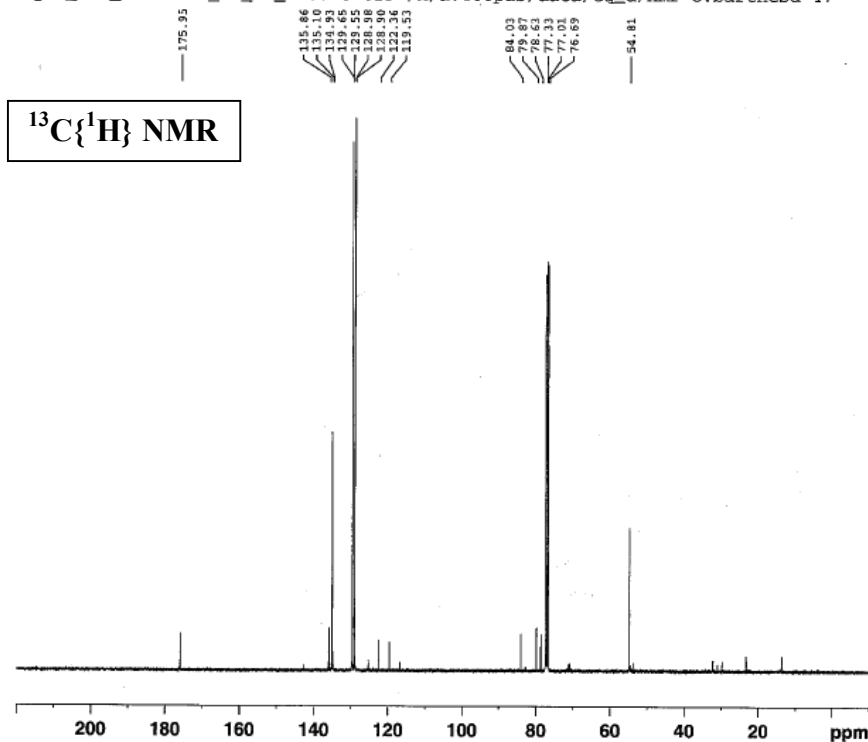

**BRUKER**

Current Data Parameters  
NAME cbaG0214  
EXPNO 2  
PROCNO 1

F2 - Acquisition Parameters  
Date\_ 20120420  
Time 3.10  
INSTRUM spect  
PROBHD 5 mm PABBO BB-  
PULPROG 1a\_sgdc60  
TD 65536  
SOLVENT CDCl3  
NS 5000  
DS 4  
SWH 23148.149 Hz  
FIDRES 0.353213 Hz  
AQ 1.4156276 sec  
RG 2050  
DW 21.600 usec  
DE 6.50 usec  
TE 298.0 K  
D1 1.00000000 sec  
D11 0.03000000 sec  
TDO 1

===== CHANNEL f1 =====  
NUC1  $^{13}\text{C}$   
P1 9.00 usec  
PLW1 70.00000000 W  
SFO1 100.6308781 MHz

===== CHANNEL f2 =====  
CPOPRG2 waltz16  
NUC2  $^1\text{H}$   
PCPD2 90.00 usec  
PLW2 17.00000000 W  
PLW12 0.38819000 W  
SFO2 400.1616006 MHz

F2 - Processing parameters  
SI 131072  
SF 100.6203130 MHz  
WDW EM  
SSB 0  
LB 1.00 Hz  
GB 0  
PC 1.50

cbd204.12 cetone cf3trienediphenyle  
Night\_F19\_NS\_40 CDCl3 /x/av400pas/data/eq\_d/nmr c.barthesd 47

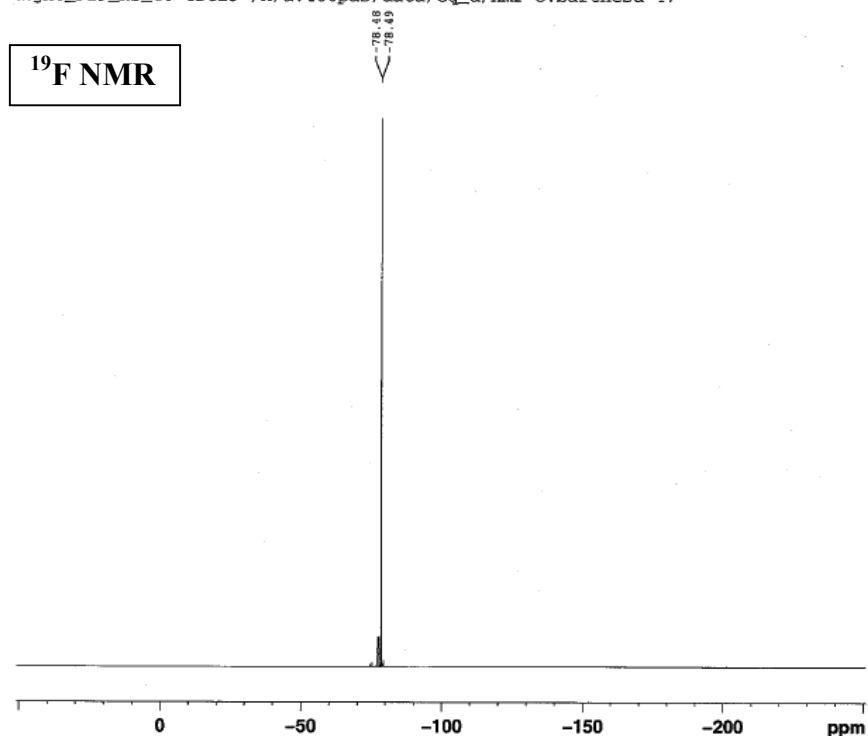

**BRUKER**

Current Data Parameters  
NAME cbaG0214  
EXPNO 1  
PROCNO 1

F2 - Acquisition Parameters  
Date\_ 20120419  
Time 23.41  
INSTRUM spect  
PROBHD 5 mm PABBO BB-  
PULPROG 1a\_sgdc60  
TD 131072  
SOLVENT CDCl3  
NS 40  
DS 4  
SWH 113636.367 Hz  
FIDRES 0.866977 Hz  
AQ 0.5767668 sec  
RG 724  
DW 4.400 usec  
DE 6.50 usec  
TE 298.0 K  
D1 1.00000000 sec  
TDO 1

===== CHANNEL f1 =====  
NUC1  $^{19}\text{F}$   
P1 11.65 usec  
PLW1 25.00000000 W  
SFO1 376.4889413 MHz

F2 - Processing parameters  
SI 65536  
SF 376.5269940 MHz  
WDW EM  
SSB 0  
LB 0.30 Hz  
GB 0  
PC 1.00



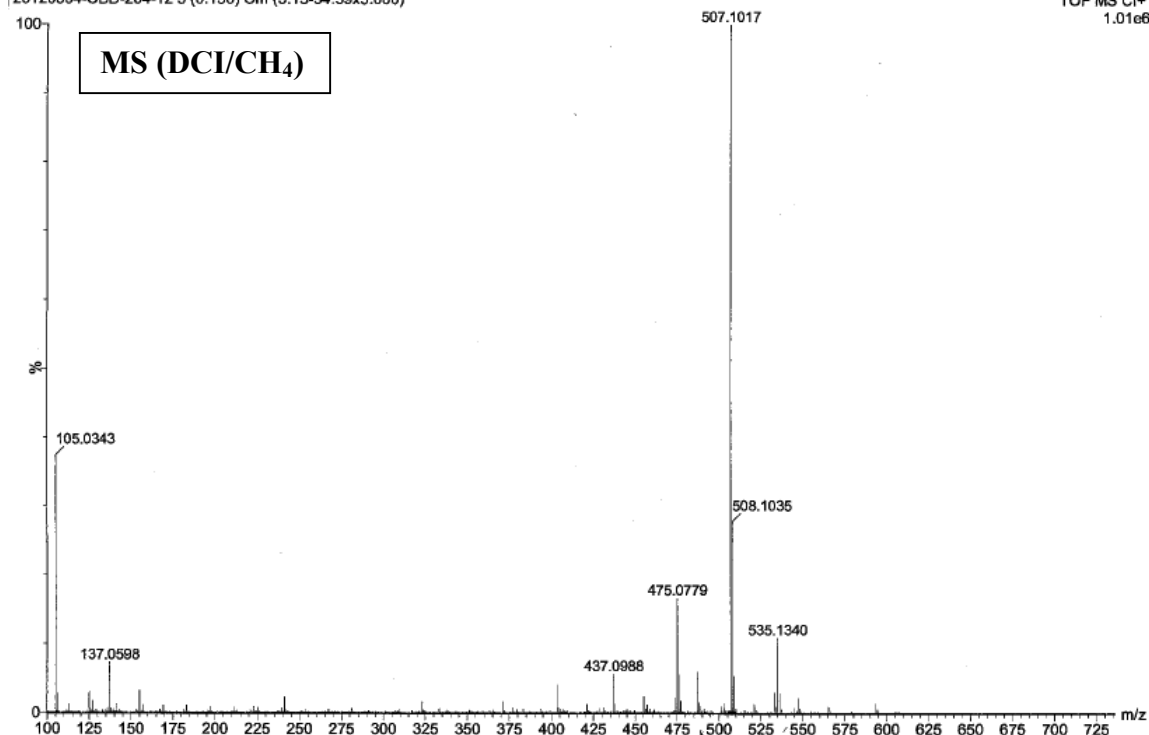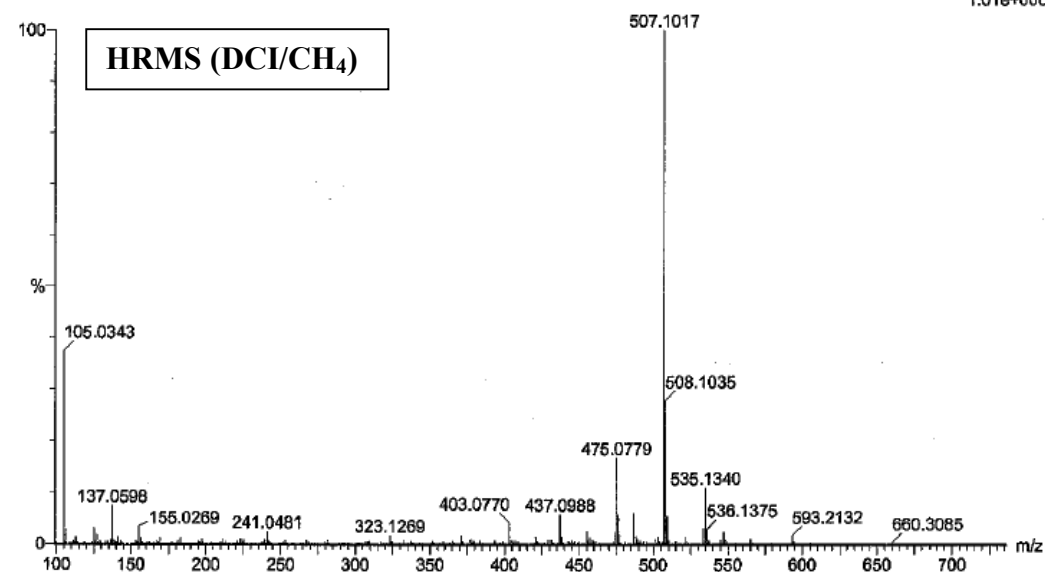

Minimum: -1.5  
Maximum: 1.3 5.0 50.0

| Mass     | Calc. Mass | mDa  | PPM  | DBE  | i-FIT   | Formula        |
|----------|------------|------|------|------|---------|----------------|
| 507.1017 | 507.1031   | -1.4 | -2.8 | 15.5 | 595.8   | C26 H17 O4 F6  |
|          | 507.0995   | 2.2  | 4.3  | 16.5 | 1550.5  | C27 H15 O F8   |
|          | 507.1007   | 1.0  | 2.0  | 12.5 | 1844.7  | C24 H16 O2 F9  |
|          | 507.1020   | -0.3 | -0.6 | 19.5 | 3266.5  | C29 H16 O3 F5  |
|          | 507.1018   | -0.1 | -0.2 | 8.5  | 5799.3  | C21 H17 O3 F10 |
|          | 507.1008   | 0.9  | 1.8  | 23.5 | 9095.6  | C32 H15 O2 F4  |
|          | 507.1033   | -1.6 | -3.2 | 26.5 | 16305.2 | C34 H16 O4 F   |
|          | 507.0997   | 2.0  | 3.9  | 27.5 | 17704.9 | C35 H14 O F3   |

**7b.** 4,7,13,16-tetramethoxy-1,10-bis(4-methoxyphenyl)-4,7-diphenyl-13,16-bis(trifluoromethyl)cyclooctadeca-2,5,8,11,14,17-hexayne-1,10-diol

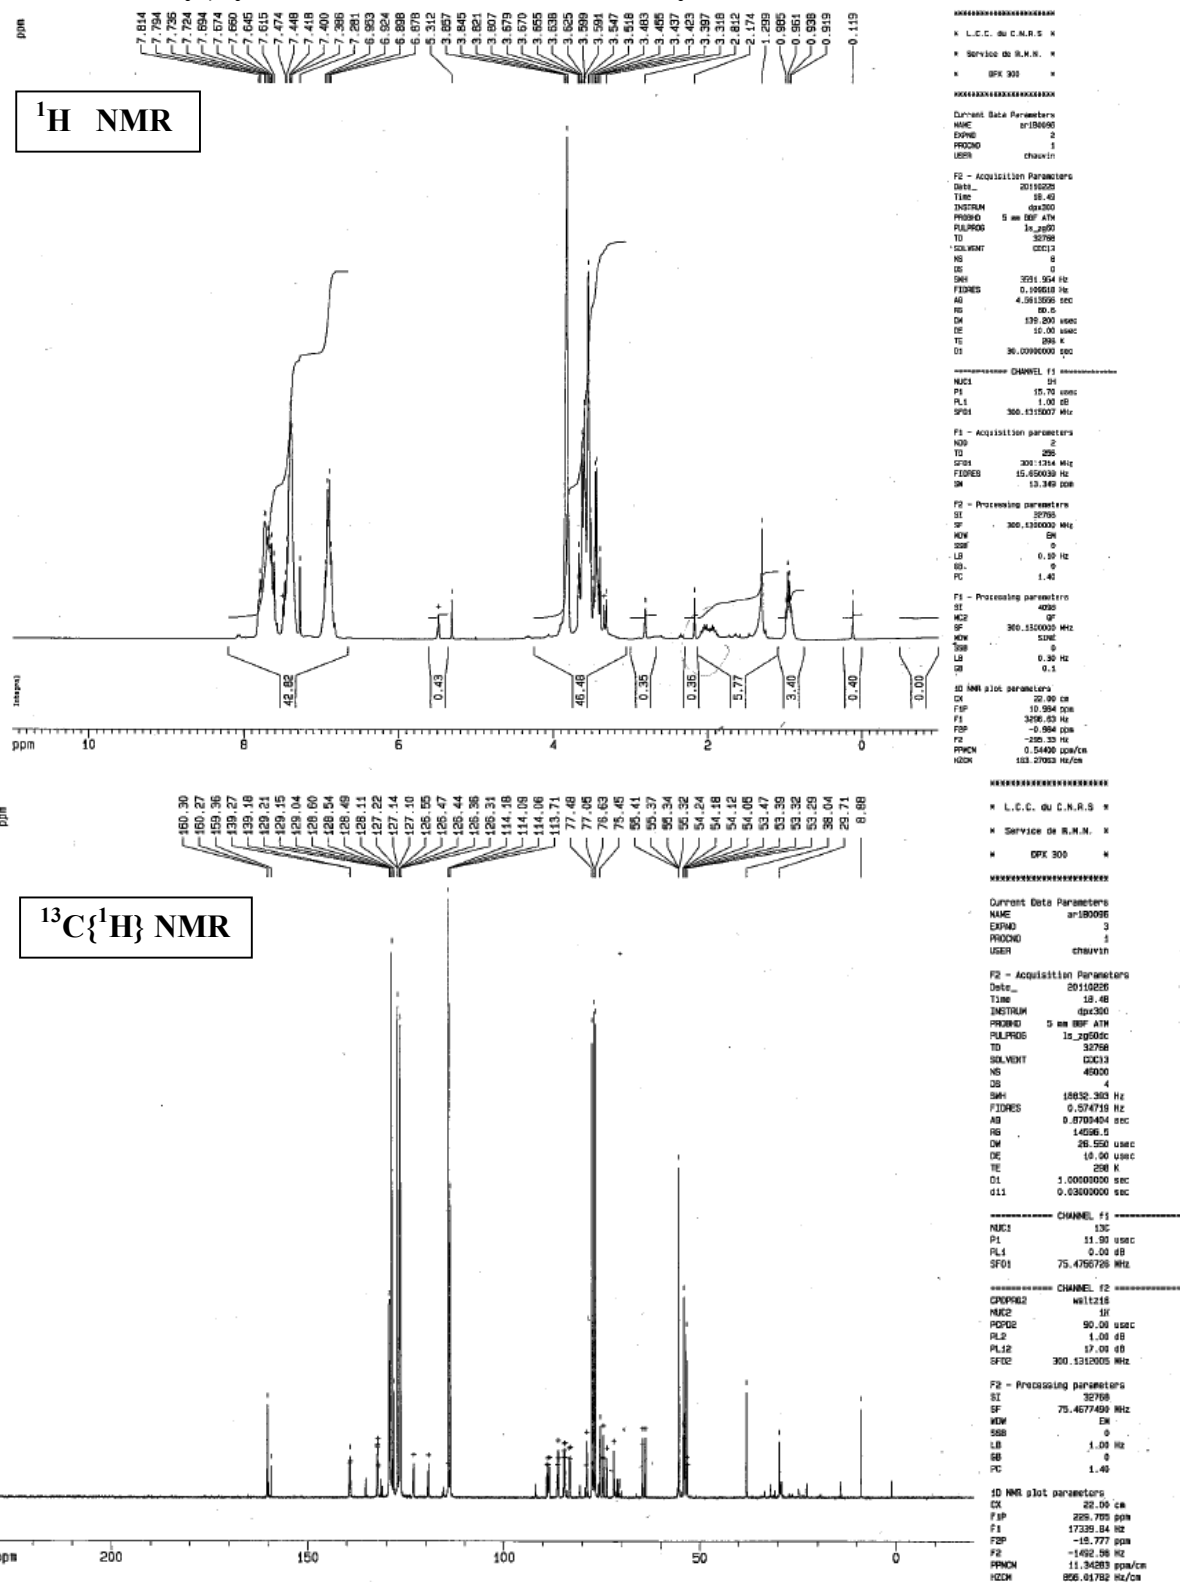

<sup>19</sup>F NMR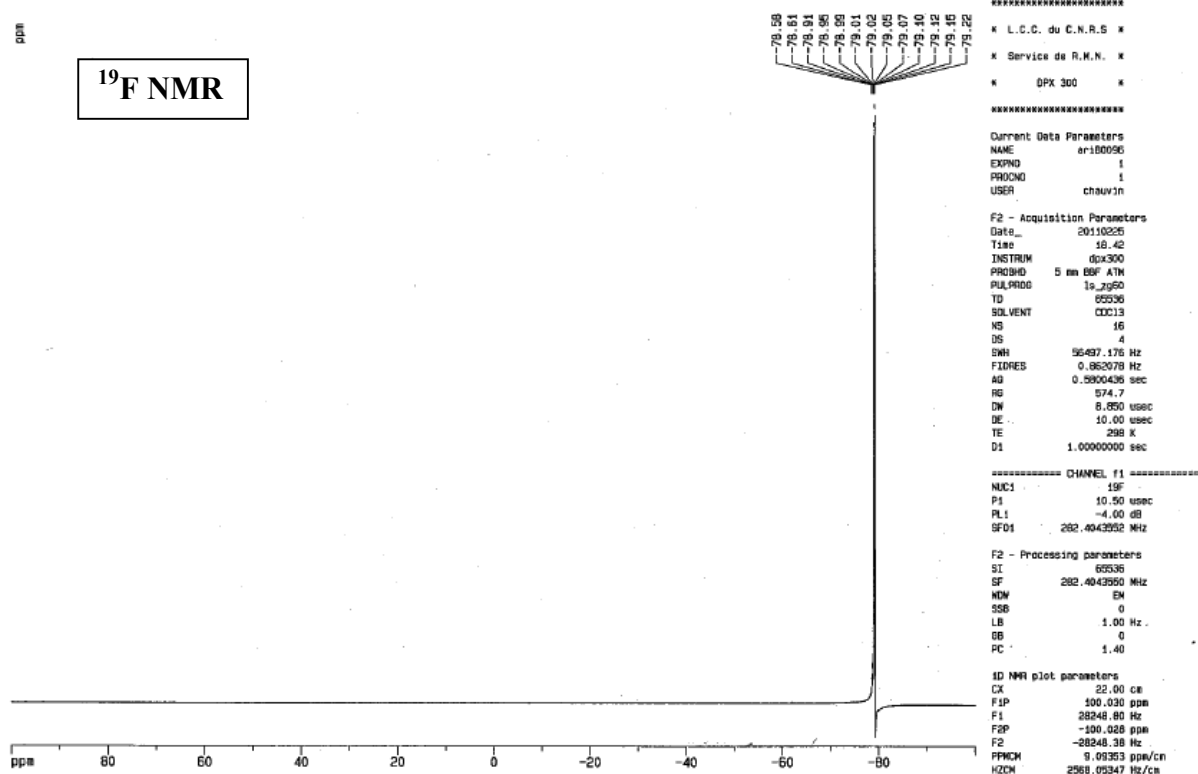

DCI-CH4  
20110221-AR133B 14 (0.450) Cm (14:34-89:100x5.000)

GCT Premier CAB109

21-Feb-2011 09:55:41  
TOF MS C1+  
2.83e+005

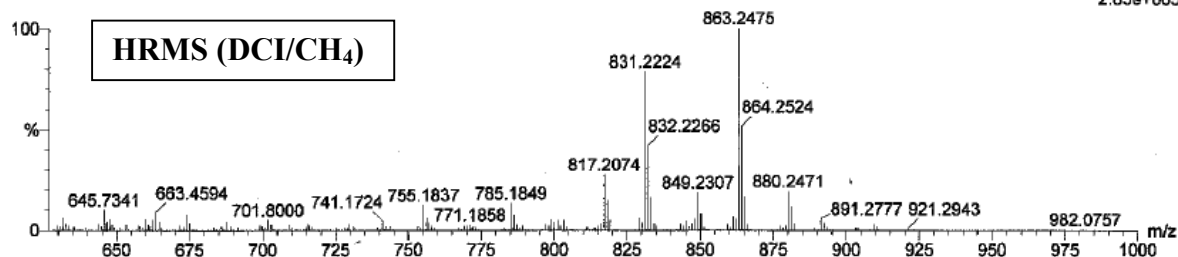

|          |      |      |      |
|----------|------|------|------|
| Minimum: |      |      | -1.5 |
| Maximum: | 50.0 | 10.0 | 50.0 |

| Mass     | Calc. Mass | mDa  | PPM  | DBE  | i-FIT   | Formula |     |     |    |       |
|----------|------------|------|------|------|---------|---------|-----|-----|----|-------|
| 881.2552 | 881.2549   | 0.3  | 0.3  | 28.5 | 7720.1  | C50     | H39 | O8  | F6 | - MH+ |
|          | 881.2538   | 1.4  | 1.6  | 32.5 | 8489.5  | C53     | H38 | O7  | F5 |       |
|          | 881.2574   | -2.2 | -2.5 | 31.5 | 8508.4  | C52     | H40 | O10 | F3 |       |
|          | 881.2490   | 6.2  | 7.0  | 37.5 | 9226.5  | C57     | H35 | O3  | F6 |       |
|          | 881.2526   | 2.6  | 3.0  | 36.5 | 9232.8  | C56     | H37 | O6  | F4 |       |
|          | 881.2562   | -1.0 | -1.1 | 35.5 | 9244.2  | C55     | H39 | O9  | F2 |       |
|          | 881.2515   | 3.7  | 4.2  | 40.5 | 9937.1  | C59     | H36 | O5  | F3 |       |
|          | 881.2551   | 0.1  | 0.1  | 39.5 | 9942.0  | C58     | H38 | O8  | F  |       |
|          | 881.2479   | 7.3  | 8.3  | 41.5 | 9946.1  | C60     | H34 | O2  | F5 |       |
|          | 881.2539   | 1.3  | 1.5  | 43.5 | 10600.8 | C61     | H37 | O7  |    |       |
|          | 881.2503   | 4.9  | 5.6  | 44.5 | 10610.4 | C62     | H35 | O4  | F2 |       |
|          | 881.2468   | 8.4  | 9.5  | 45.5 | 10624.8 | C63     | H33 | O   | F4 |       |
|          | 881.2492   | 6.0  | 6.8  | 48.5 | 11243.1 | C65     | H34 | O3  | F  |       |

**7c. 4,7,13,16-tetramethoxy-1,4,7,10-tetraphenyl-13,16-bis(trifluoromethyl)cyclooctadeca-2,5,8,11,14,17-hexayne-1,10-diol**

cbd208.12.1.1.caract  
Night\_H1\_int\_NS\_8 CDC13 /x/av400pas/data/eq\_d/nmr c.barthesd 44

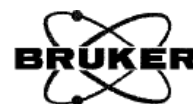

**<sup>1</sup>H NMR**

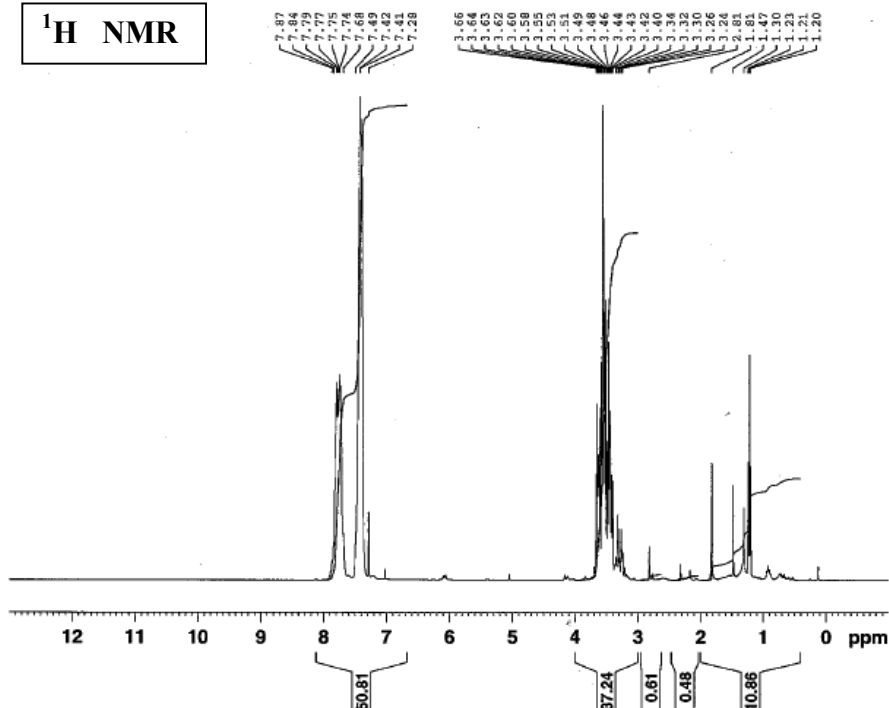

Current Data Parameters  
NAME chaG0221  
EXPNO 3  
PROCNO 1

F2 - Acquisition Parameters  
Date\_ 20120426  
Time 19.15  
INSTRUM spect  
PROBHD 5 mm PABBO BB-  
PULPROG 1s\_zg60  
TD 65536  
SOLVENT CDC13  
NS 8  
DS 2  
SWH 5597.015 Hz  
FIDRES 0.085404 Hz  
AQ 5.8545995 sec  
RG 36  
DW 89.333 usec  
DE 6.50 usec  
TE 298.0 K  
D1 20.0000000 sec  
TD0 1

===== CHANNEL f1 =====  
NUC1 1H  
P1 13.60 usec  
PLW1 17.0000000 W  
SFO1 400.1624010 MHz

F2 - Processing parameters  
SI 131072  
SF 400.1600000 MHz  
WDW EM  
SSB 0  
LB 0.10 Hz  
GB 0  
PC 1.50

cbd208.12.1.1.caract  
Night\_C13\_DECOUPLE\_H1\_NS\_5000 CDC13 /x/av400pas/data/eq\_d/nmr c.barthesd 44

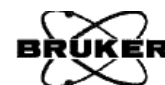

**<sup>13</sup>C{<sup>1</sup>H} NMR**

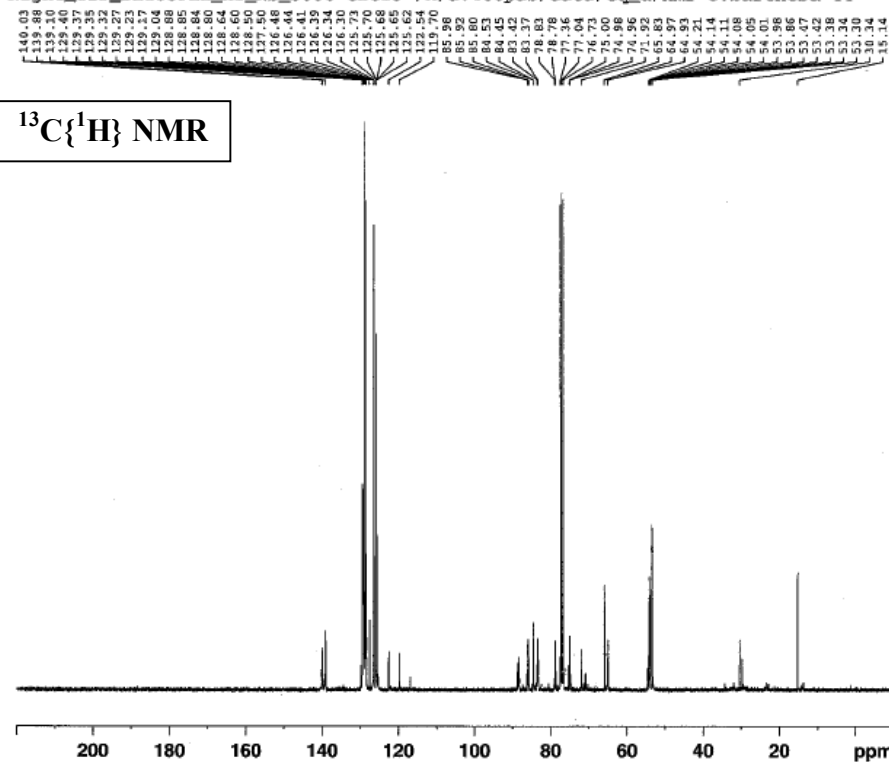

Current Data Parameters  
NAME chaG0221  
EXPNO 1  
PROCNO 1

F2 - Acquisition Parameters  
Date\_ 20120426  
Time 22.43  
INSTRUM spect  
PROBHD 5 mm PABBO BB-  
PULPROG 1s\_zgdc60  
TD 65536  
SOLVENT CDC13  
NS 5000  
DS 4  
SWH 23148.148 Hz  
FIDRES 0.353213 Hz  
AQ 1.4156276 sec  
RG 2050  
DW 21.600 usec  
DE 6.50 usec  
TE 298.0 K  
D1 1.0000000 sec  
D11 0.0300000 sec  
TD0 1

===== CHANNEL f1 =====  
NUC1 13C  
P1 9.00 usec  
PLW1 70.0000000 W  
SFO1 100.6308781 MHz

===== CHANNEL f2 =====  
CPDPRG2 waltz16  
NUC2 1H  
PCPD2 90.00 usec  
PLW2 17.0000000 W  
PLW12 0.38819000 W  
SFO2 400.1616006 MHz

F2 - Processing parameters  
SI 131072  
SF 100.6203130 MHz  
WDW EM  
SSB 0  
LB 1.00 Hz  
GB 0  
PC 1.50

cbd208.12.1.1.caract  
Night\_F19\_NS\_40 CDCl3 /x/av400pas/data/eq\_d/nmr c.barthesd 44

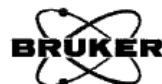

**<sup>19</sup>F NMR**

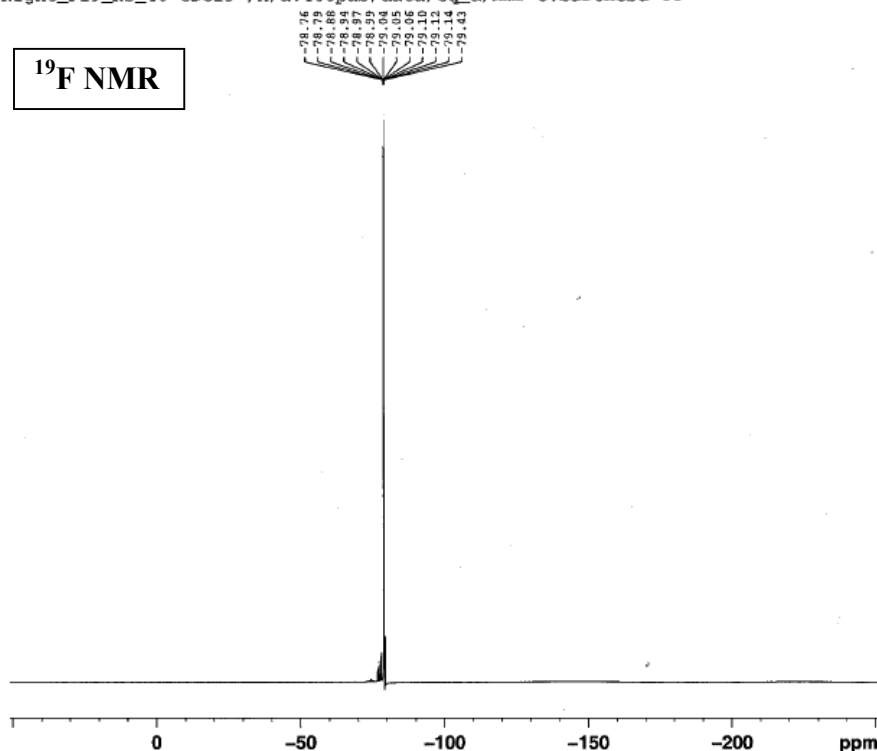

Current Data Parameters  
NAME cbaG0221  
EXPNO 2  
PROCNO 1

F2 - Acquisition Parameters  
Date\_ 20120426  
Time 22.45  
INSTRUM spect  
PROBHD 5 mm PABBO BB-  
PULPROG 18\_zgpg0  
TD 131072  
SOLVENT CDCl3  
NS 40  
DS 4  
SWH 113636.367 Hz  
FIDRES 0.866977 Hz  
AQ 0.5767668 sec  
RG 812  
DW 4.400 usec  
DE 6.50 usec  
TE 298.0 K  
D1 1.00000000 sec  
TDO 1

===== CHANNEL f1 =====  
NUC1 19F  
P1 11.65 usec  
PLM1 25.00000000 W  
SFO1 376.4889413 MHz

F2 - Processing parameters  
SI 65536  
SF 376.5265940 MHz  
WDW EM  
SSB 0  
LB 0.30 Hz  
GB 0  
PC 1.00

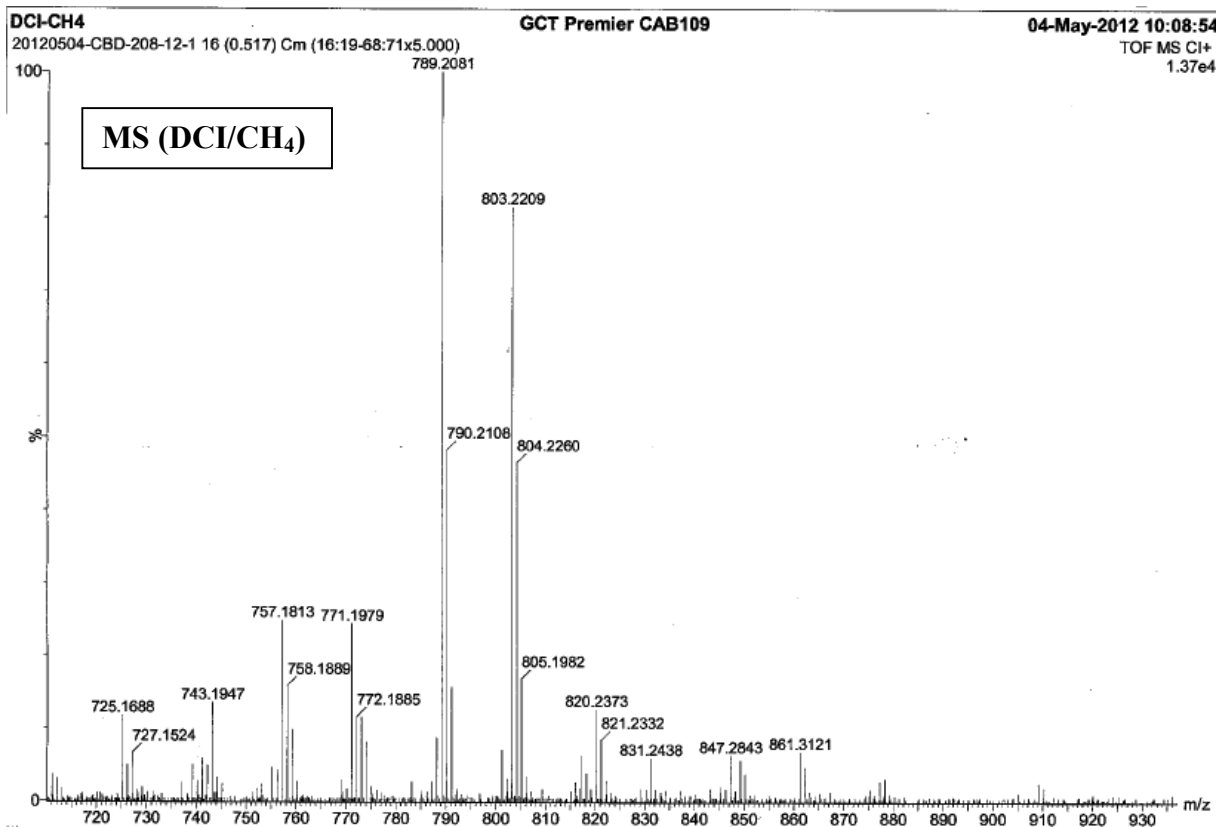

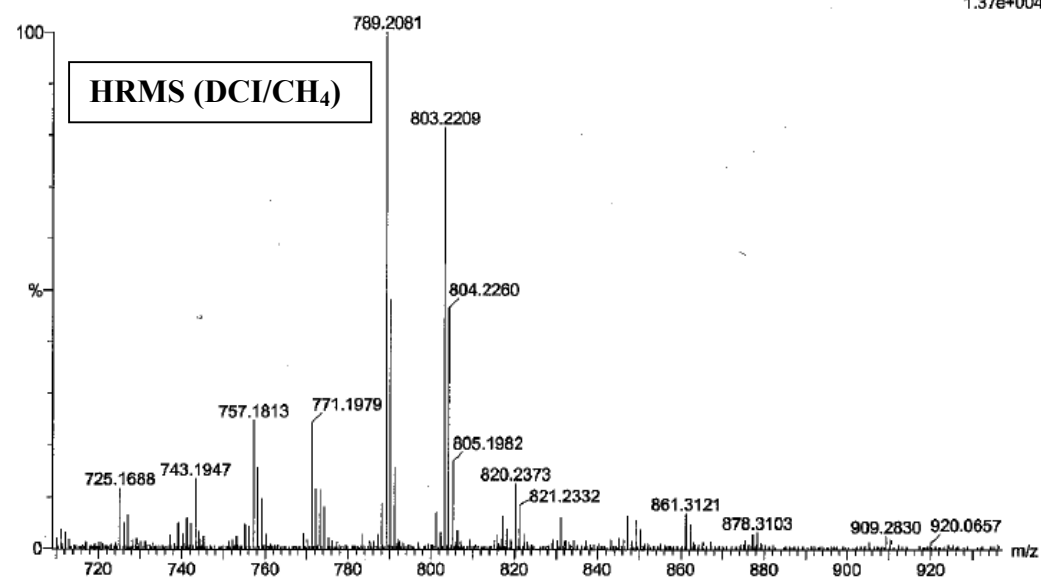

Minimum: -1.5  
Maximum: 50.0

| Mass     | Calc. Mass | mDa  | PPM  | DBE  | i-Fit  | Formula |     |    |    |
|----------|------------|------|------|------|--------|---------|-----|----|----|
| 803.2209 | 803.2209   | 0.0  | 0.0  | 37.5 | 29.4   | C54     | H31 | O3 | F4 |
|          | 803.2234   | -2.5 | -3.1 | 40.5 | 32.6   | C56     | H32 | O5 | F  |
|          | 803.2173   | 3.6  | 4.5  | 38.5 | 34.8   | C55     | H29 | F6 |    |
|          | 803.2198   | 1.1  | 1.4  | 41.5 | 38.2   | C57     | H30 | O2 | F3 |
|          | 803.2221   | -1.2 | -1.5 | 33.5 | 41.1   | C51     | H32 | O4 | F5 |
|          | 803.2186   | 2.3  | 2.9  | 45.5 | 66.2   | C60     | H29 | O  | F2 |
|          | 803.2232   | -2.3 | -2.9 | 29.5 | 75.0   | C48     | H33 | O5 | F6 |
|          | 803.2175   | 3.4  | 4.2  | 49.5 | 111.6  | C63     | H28 | F  |    |
|          | 803.2245   | -3.6 | -4.5 | 36.5 | 2875.4 | C53     | H33 | O6 | F2 |

**7d.** 4,7,13,16-tetramethoxy-4,7-diphenyl-13,16-bis(trifluoromethyl)-1,10-bis[4-(trifluoromethyl)phenyl]cyclooctadeca-2,5,8,11,14,17-hexayne-1,10-diol

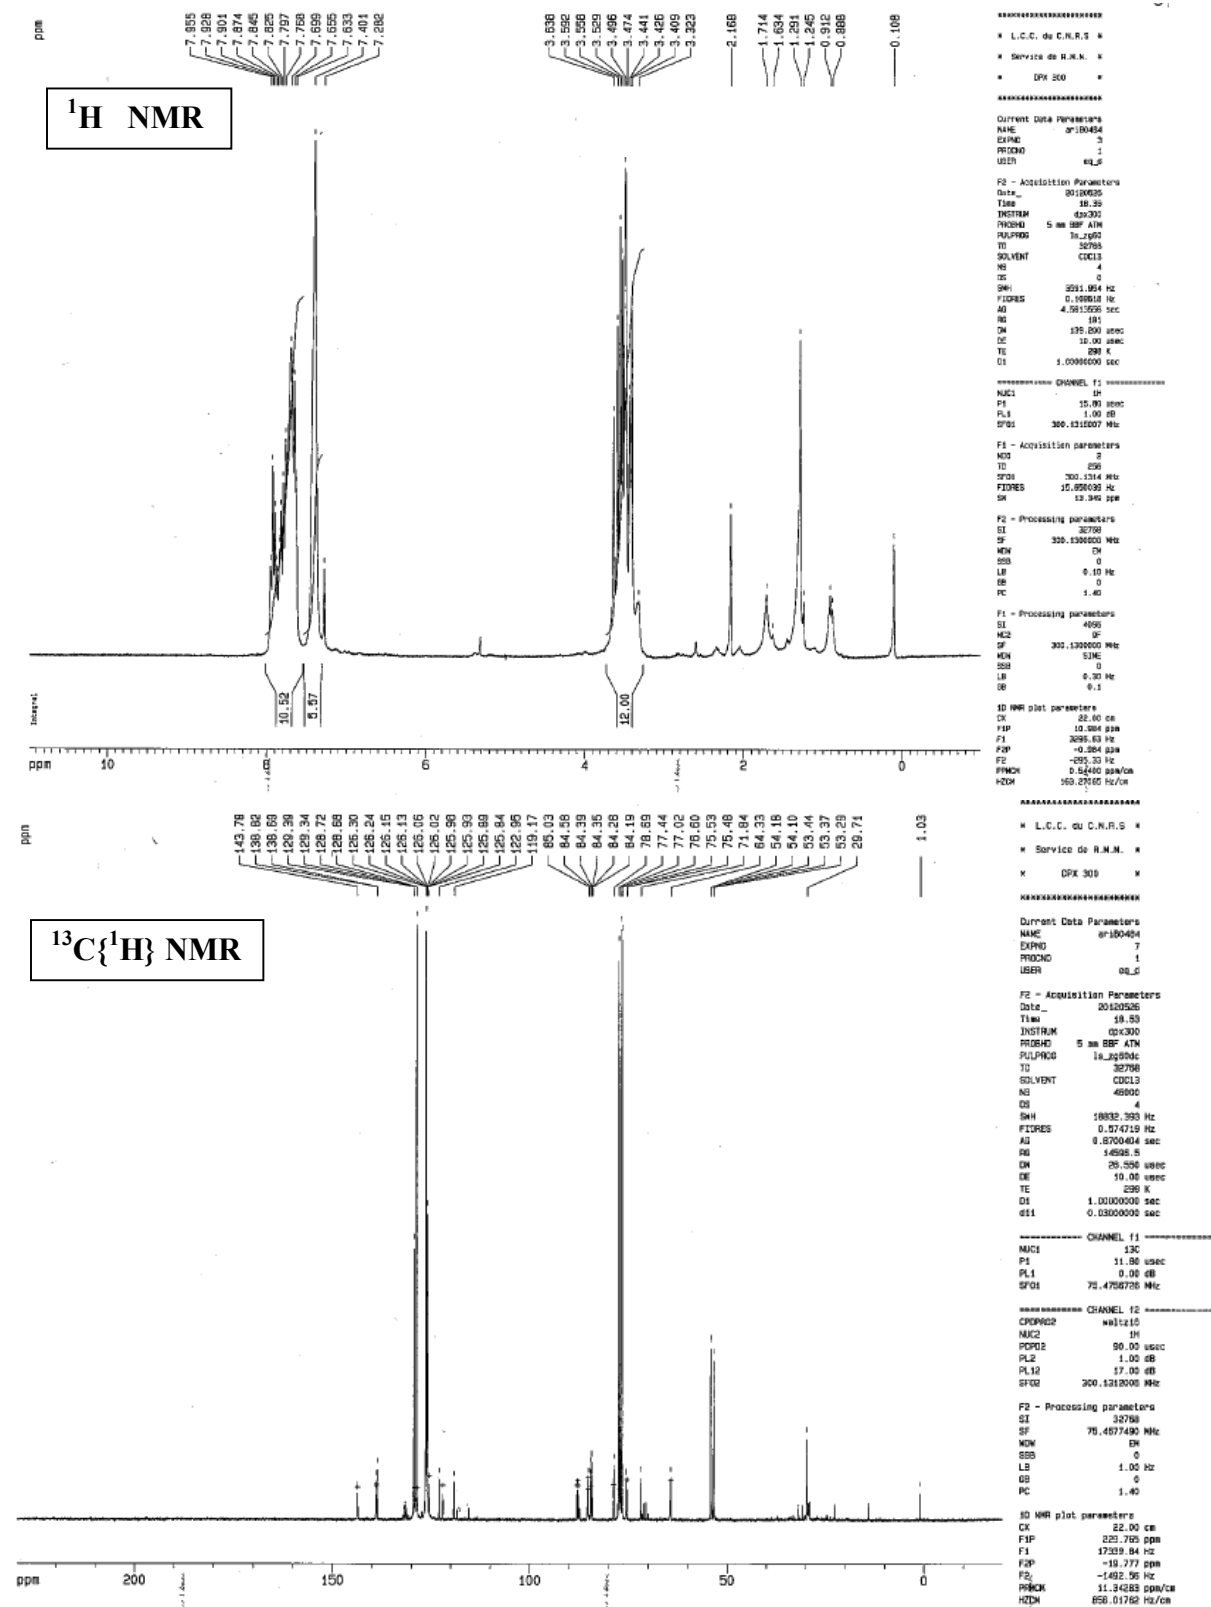

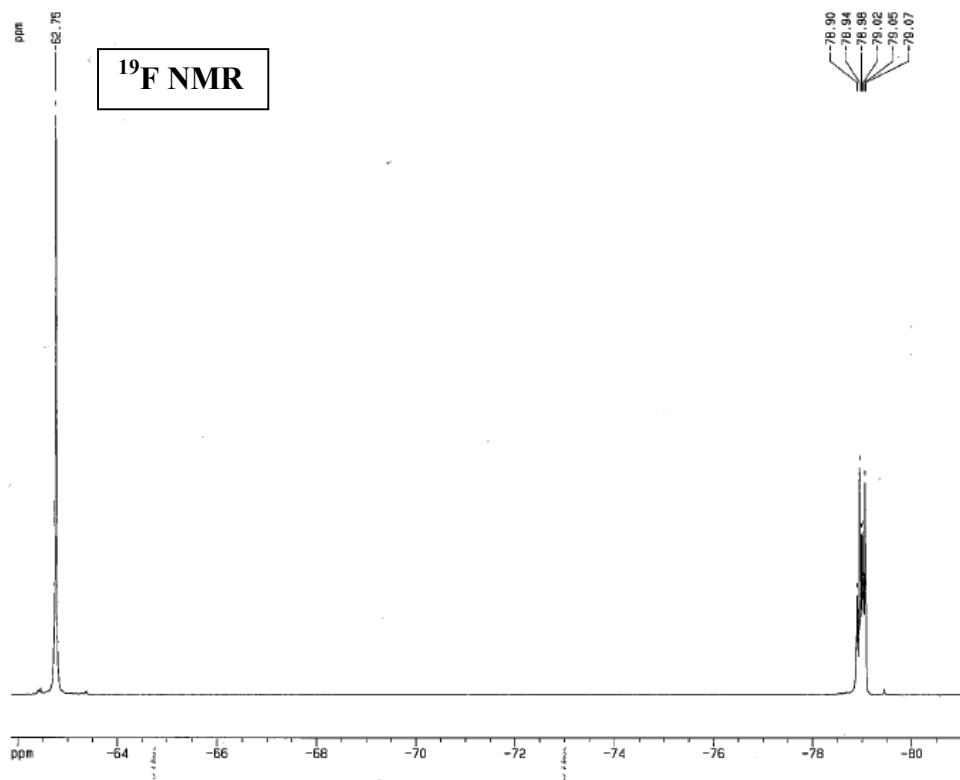

```

*****
* L.C.C. du C.N.R.S *
* Service de R.M.N. *
* DFX 300 *
*****

Current Data Parameters
NAME ar180484
EXPNO 4
PROCNO 1
USER eq_g

F2 - Acquisition Parameters
Date_ 20120525
Time 19.39
INSTRUM dpx300
PROBHD 5 mm BFX ATN
PULPROG zgpg30
TD 65536
SOLVENT CDCl3
NS 4
DS 0
SWH 56497.176 Hz
FIDRES 0.062078 Hz
AQ 0.5900435 sec
RG 574.7
DW 8.850 usec
DE 10.00 usec
TE 298 K
D1 1.0000000 sec

----- CHANNEL f1 -----
NUC1 19F
P1 10.50 usec
PL1 -4.00 dB
SFO1 282.4043552 MHz

F2 - Processing parameters
SI 65536
SF 282.4043550 MHz
WDW EM
SSB 0
LB 1.00 Hz
GB 0
PC 1.40

1D NMR plot parameters
CX 22.00 cm
F1P -61.805 ppm
F1 -17409.17 Hz
F2P -81.060 ppm
F2 -22891.57 Hz
PPMCK 0.87277 ppm/cm
HZCK 246.47301 Hz/cm

```

F19\_

AR45380

78.90  
78.94  
78.98  
79.02  
79.05  
79.07

**$^{19}\text{F}$  NMR**

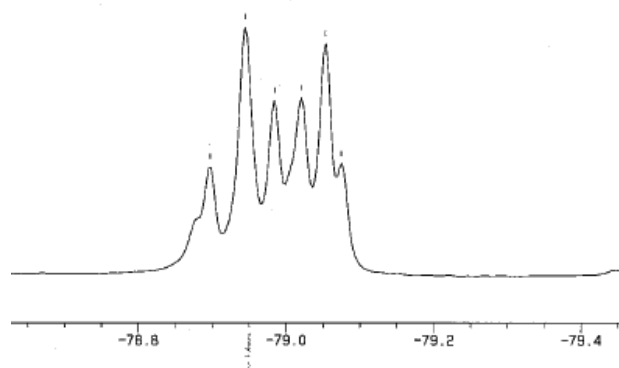



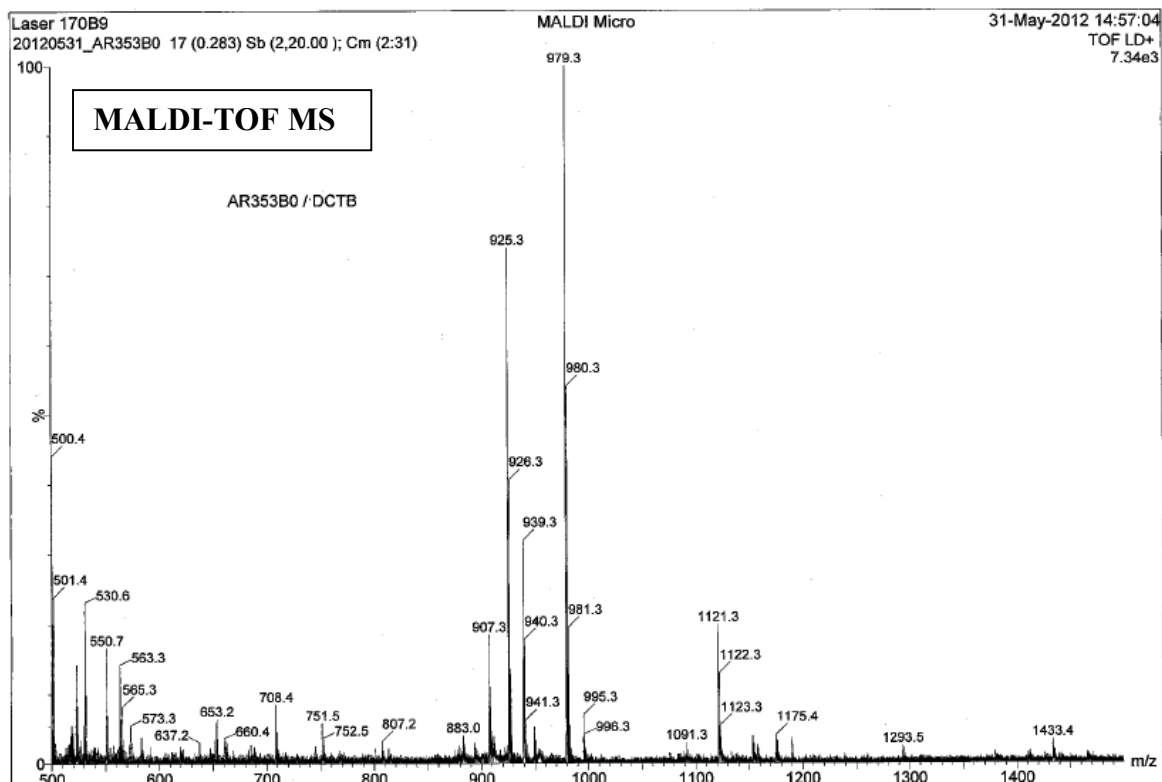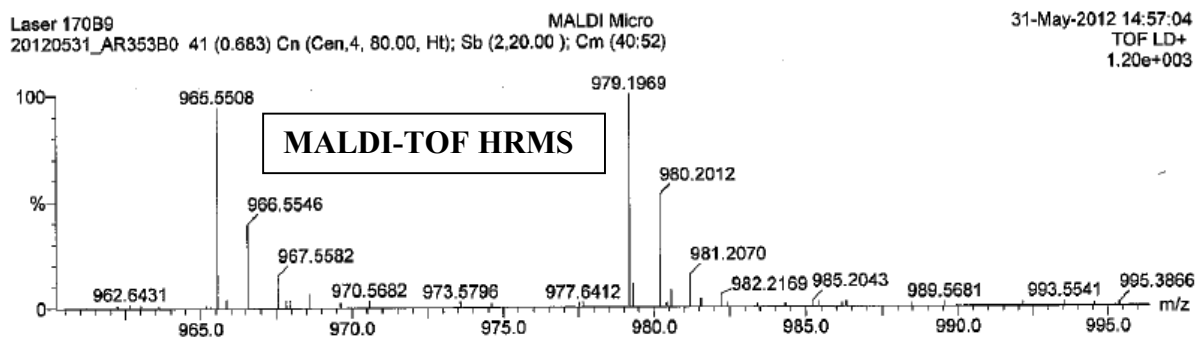

Minimum: -1.5  
Maximum: 70.0

| Mass     | Calc. Mass | mDa  | PPM  | DBE  | i-FIT | Formula |     |    |     |      |
|----------|------------|------|------|------|-------|---------|-----|----|-----|------|
| 979.1969 | 979.1916   | 5.3  | 5.4  | 24.5 | 0.2   | C47     | H33 | O7 | F13 | 23Na |
|          | 979.1905   | 6.4  | 6.5  | 28.5 | 1.9   | C50     | H32 | O6 | F12 | 23Na |
|          | 979.1894   | 7.5  | 7.7  | 32.5 | 6.1   | C53     | H31 | O5 | F11 | 23Na |
|          | 979.2058   | -8.9 | -9.1 | 32.5 | 7.2   | C54     | H32 | O3 | F12 | 23Na |
|          | 979.1918   | 5.1  | 5.2  | 35.5 | 11.3  | C55     | H32 | O7 | F8  | 23Na |
|          | 979.1882   | 8.7  | 8.9  | 36.5 | 12.4  | C56     | H30 | O4 | F10 | 23Na |
|          | 979.2046   | -7.7 | -7.9 | 36.5 | 13.8  | C57     | H31 | O2 | F11 | 23Na |
|          | 979.1907   | 6.2  | 6.3  | 39.5 | 19.4  | C58     | H31 | O6 | F7  | 23Na |
|          | 979.1895   | 7.4  | 7.6  | 43.5 | 29.4  | C61     | H30 | O5 | F6  | 23Na |
|          | 979.2059   | -9.0 | -9.2 | 43.5 | 31.7  | C62     | H31 | O3 | F7  | 23Na |
|          | 979.2048   | -7.9 | -8.1 | 47.5 | 43.3  | C65     | H30 | O2 | F6  | 23Na |

**7e. 1,10-bis[4-(9H-carbazol-9-yl)phenyl]-4,7,13,16-tetramethoxy-13,16-diphenyl-4,7-bis(trifluoromethyl)cyclooctadeca-2,5,8,11,14,17-hexayne-1,10-diol**

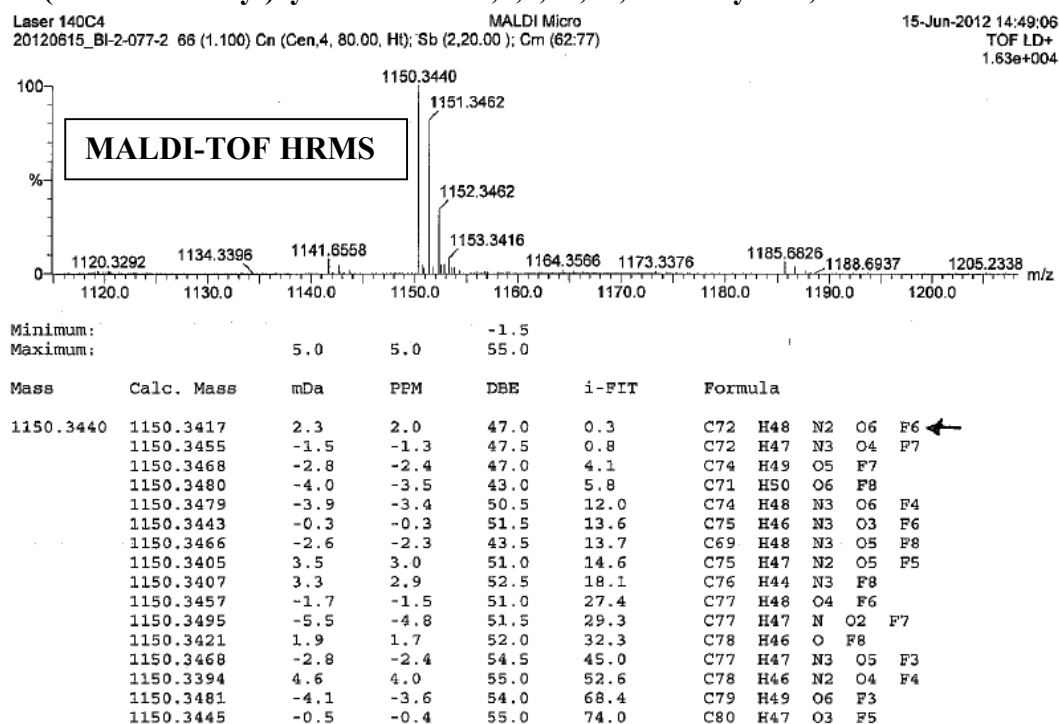

**7f. 1,10-bis[4-(1H-indol-1-yl)phenyl]-4,7,13,16-tetramethoxy-4,7-diphenyl-13,16-bis(trifluoromethyl)cyclooctadeca-2,5,8,11,14,17-hexayne-1,10-diol**

bi-2.116.1  
Day\_H1\_int\_NS\_8 CDC13 /x/av400pas/data/eq\_d/nmr i.baglaj 28

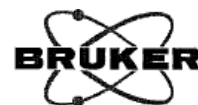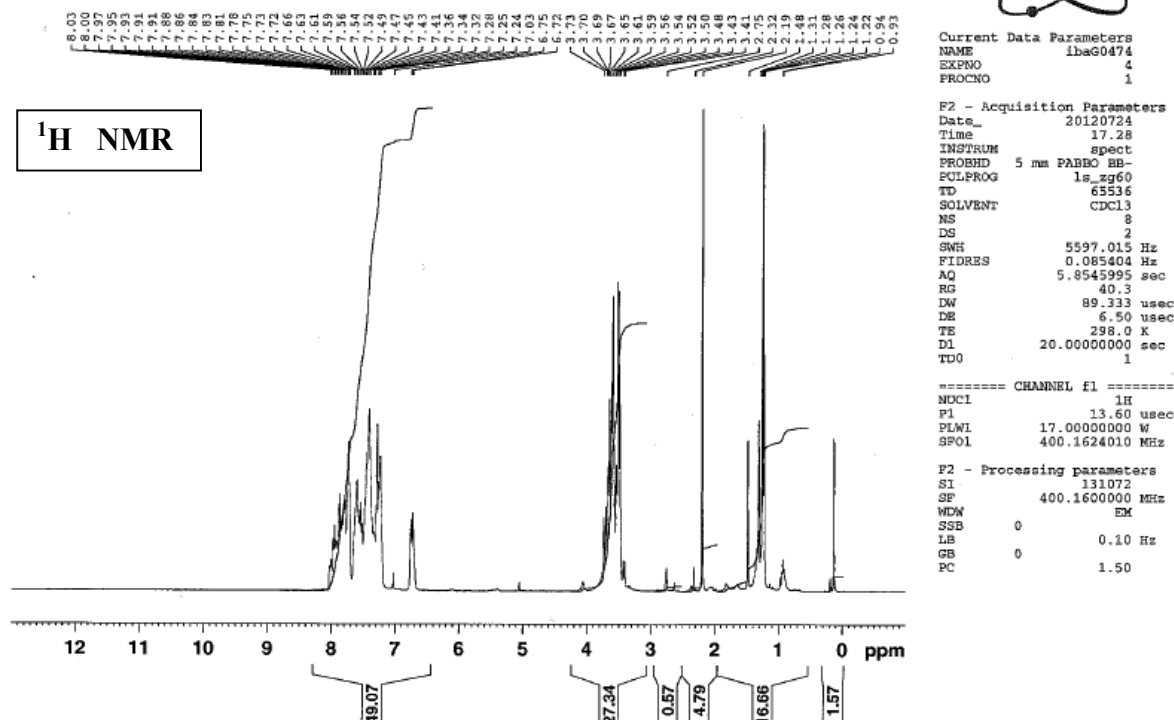

bi-2.116.1  
Night\_C13\_JMOD\_H1\_NS\_3000 CDC13 /x/av400pas/data/eq\_d/nmr i.baglari 28

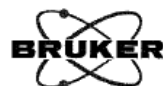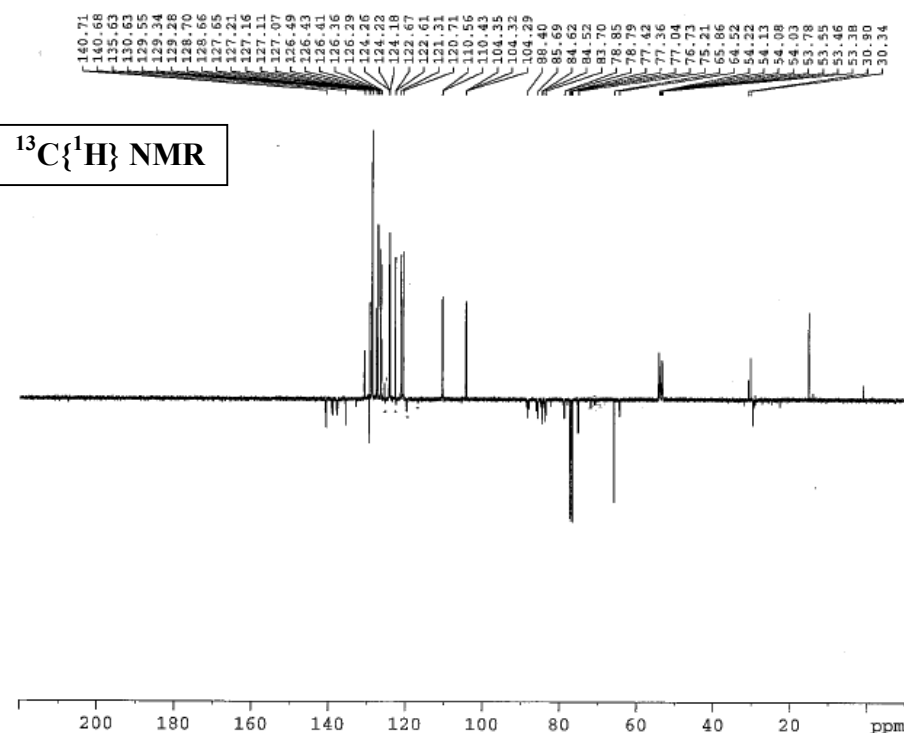

Current Data Parameters  
NAME ibag0474  
EXPNO 5  
PROCNO 1

F2 - Acquisition Parameters  
Date\_ 20120725  
Time 8.24  
INSTRUM spect  
PROBHD 5 mm PABBO BB-  
FULPROG 1s\_jmod  
TD 65536  
SOLVENT CDC13  
NS 3000  
DS 4  
SWH 23148.148 Hz  
FIDRES 0.353213 Hz  
AQ 1.4156276 sec  
RG 2050  
DW 21.600 usec  
DE 6.50 usec  
TE 298.0 K  
CNST1 145.0000000  
CNST11 1.0000000  
D1 1.0000000 sec  
D20 0.00689655 sec  
TD0 1

===== CHANNEL f1 =====  
NUC1 13C  
P1 9.00 usec  
P2 18.00 usec  
PLW1 70.00000000 W  
SFO1 100.6308781 MHz

===== CHANNEL f2 =====  
CPDPRG2 waltz16  
NUC2 1H  
PCPD2 90.00 usec  
PLW2 17.00000000 W  
PLW12 0.38819000 W  
SFO2 400.1616006 MHz

F2 - Processing parameters  
SI 131072  
SF 100.6203130 MHz  
WDW EM  
SSB 0  
LB 1.00 Hz  
GB 0  
PC 1.50

bi-2.116.1  
Day\_F19\_NS\_40 CDC13 /x/av400pas/data/eq\_d/nmr i.baglari 28

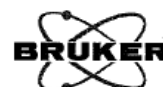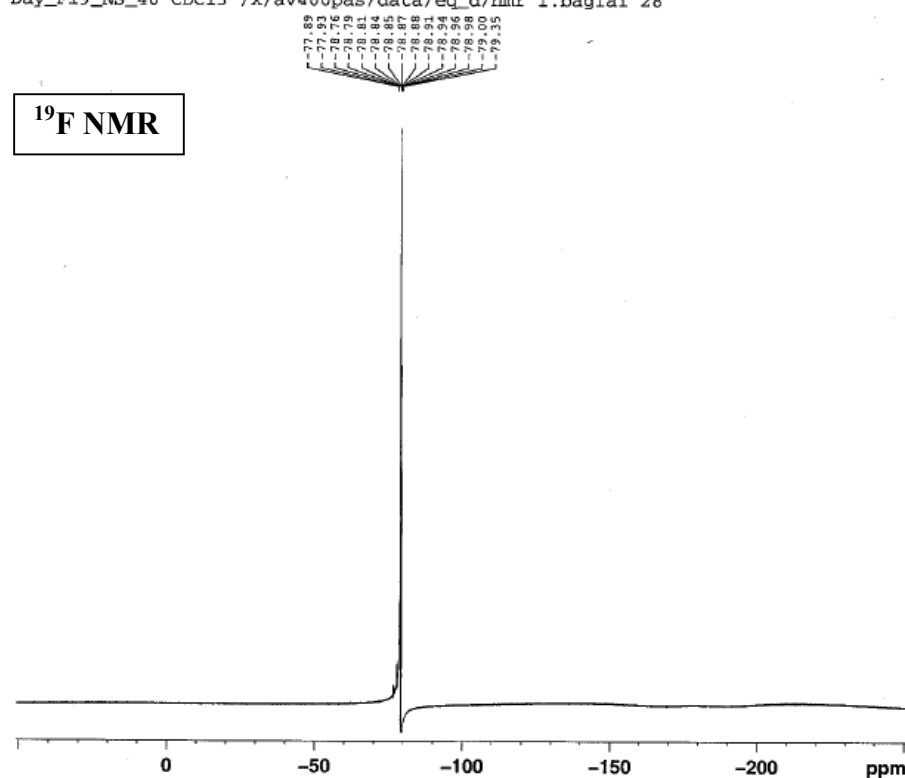

Current Data Parameters  
NAME ibag0474  
EXPNO 3  
PROCNO 1

F2 - Acquisition Parameters  
Date\_ 20120724  
Time 17.21  
INSTRUM spect  
PROBHD 5 mm PABBO BB-  
FULPROG 1s\_sg50  
TD 131072  
SOLVENT CDC13  
NS 40  
DS 4  
SWH 113636.367 Hz  
FIDRES 0.866977 Hz  
AQ 0.5767658 sec  
RG 724  
DW 4.400 usec  
DE 6.50 usec  
TE 298.0 K  
D1 1.00000000 sec  
TD0 1

===== CHANNEL f1 =====  
NUC1 19F  
P1 11.65 usec  
PLW1 25.00000000 W  
SFO1 376.4889413 MHz

F2 - Processing parameters  
SI 65536  
SF 376.5265940 MHz  
WDW EM  
SSB 0  
LB 0.30 Hz  
GB 0  
PC 1.00

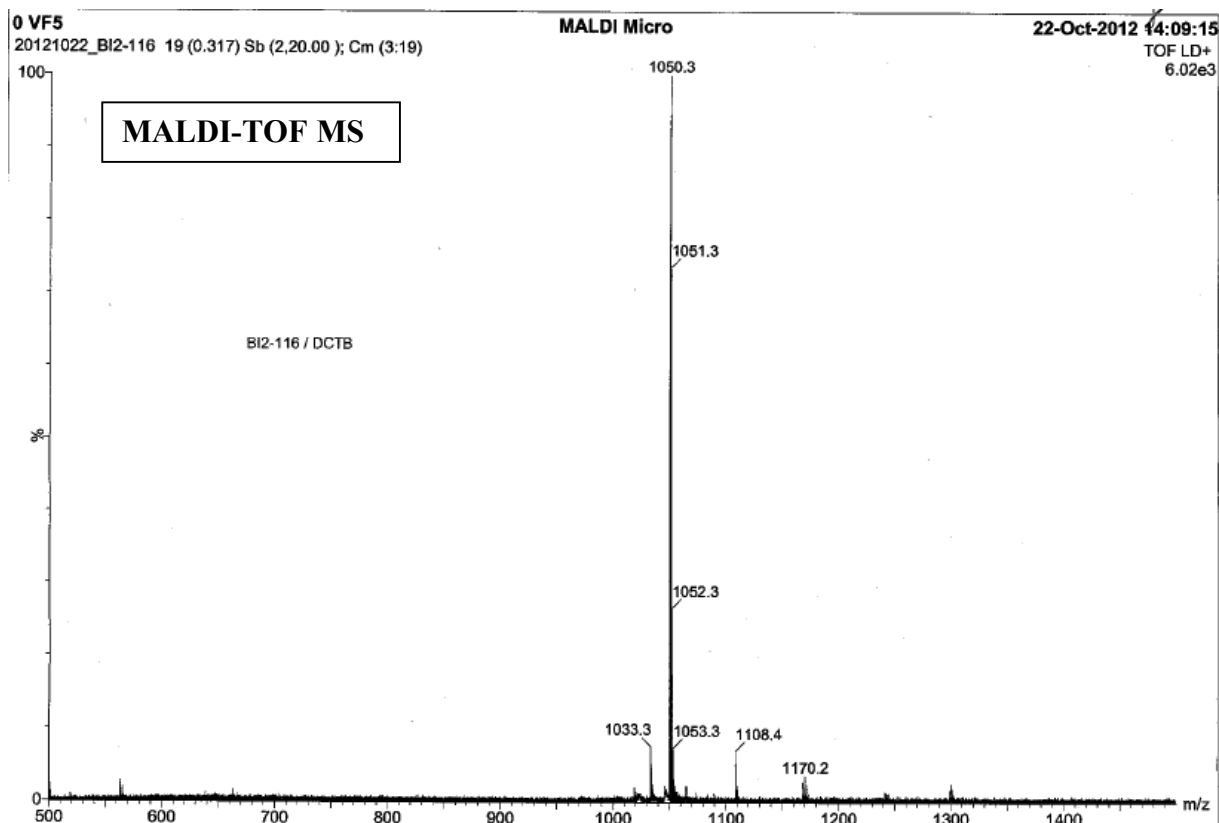

Laser 150F5  
20121022\_BI2-116 38 (0.634) Cn (Cen,4, 80.00, Ht); Sb (2,20.00); Cm (25:45)

MALDI Micro

22-Oct-2012 14:09:15  
TOF LD+  
7.35e+003

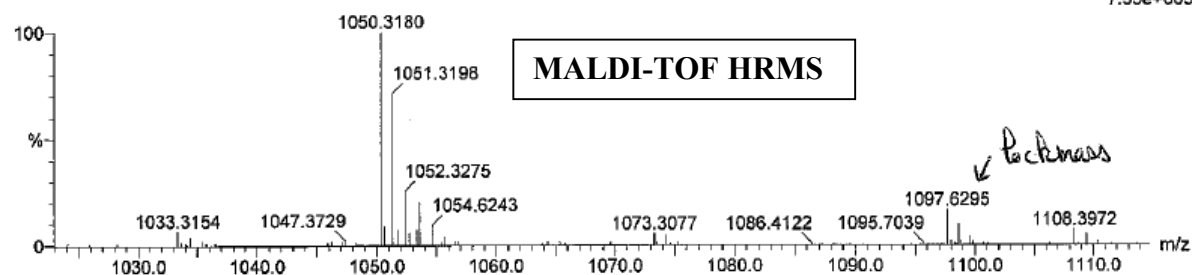

Minimum: -1.5  
Maximum: 45.0

| Mass      | Calc. Mass | mDa  | PPM  | DBE  | i-FIT | Formula          |
|-----------|------------|------|------|------|-------|------------------|
| 1050.3180 | 1050.3153  | 2.7  | 2.6  | 37.5 | 0.9   | C61 H44 N3 O5 F8 |
|           | 1050.3167  | 1.3  | 1.2  | 37.0 | 1.0   | C63 H46 O6 F8    |
|           | 1050.3241  | -6.1 | -5.8 | 36.5 | 2.2   | C62 H47 N O7 F7  |
|           | 1050.3115  | 6.5  | 6.2  | 37.0 | 2.3   | C61 H45 N2 O7 F7 |
|           | 1050.3178  | 0.2  | 0.2  | 40.5 | 3.8   | C63 H45 N3 O7 F5 |
|           | 1050.3142  | 3.8  | 3.6  | 41.5 | 4.9   | C64 H43 N3 O4 F7 |
|           | 1050.3104  | 7.6  | 7.2  | 41.0 | 7.2   | C64 H44 N2 O6 F6 |
|           | 1050.3229  | -4.9 | -4.7 | 40.5 | 9.3   | C65 H46 N O6 F6  |
|           | 1050.3193  | -1.3 | -1.2 | 41.5 | 9.7   | C66 H44 N O3 F8  |
|           | 1050.3155  | 2.5  | 2.4  | 41.0 | 10.8  | C66 H45 O5 F7    |
|           | 1050.3166  | 1.4  | 1.3  | 44.5 | 18.7  | C66 H44 N3 O6 F4 |
|           | 1050.3218  | -3.8 | -3.6 | 44.5 | 28.6  | C68 H45 N O5 F5  |
|           | 1050.3256  | -7.6 | -7.2 | 45.0 | 29.0  | C68 H44 N2 O3 F6 |
|           | 1050.3180  | 0.0  | 0.0  | 44.0 | 29.3  | C68 H46 O7 F4    |
|           | 1050.3144  | 3.6  | 3.4  | 45.0 | 32.7  | C69 H44 O4 F6    |

**7g.** 4,7,13,16-tetramethoxy-4,7-diphenyl-13,16-bis(trifluoromethyl)-1,10-bis({2-[tris(propan-2-yl)silyl]ethynyl})cyclooctadeca-2,5,8,11,14,17-hexayne-1,10-diol

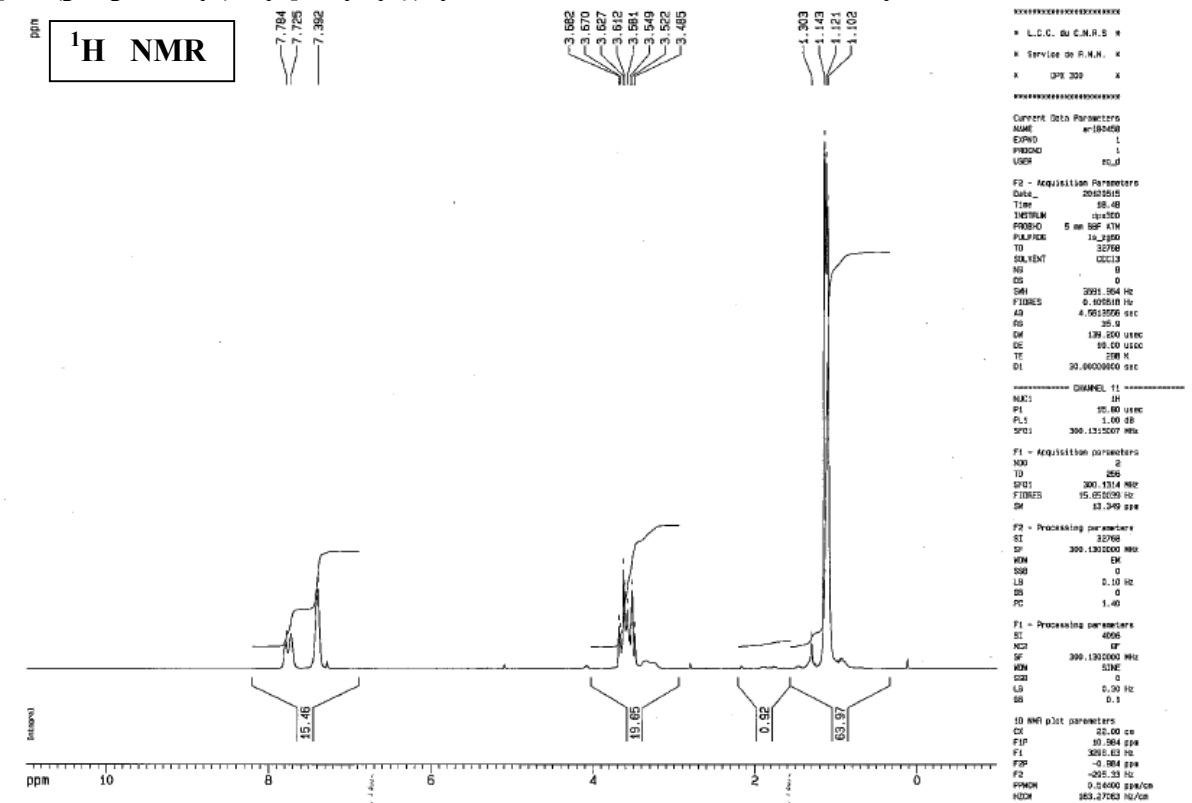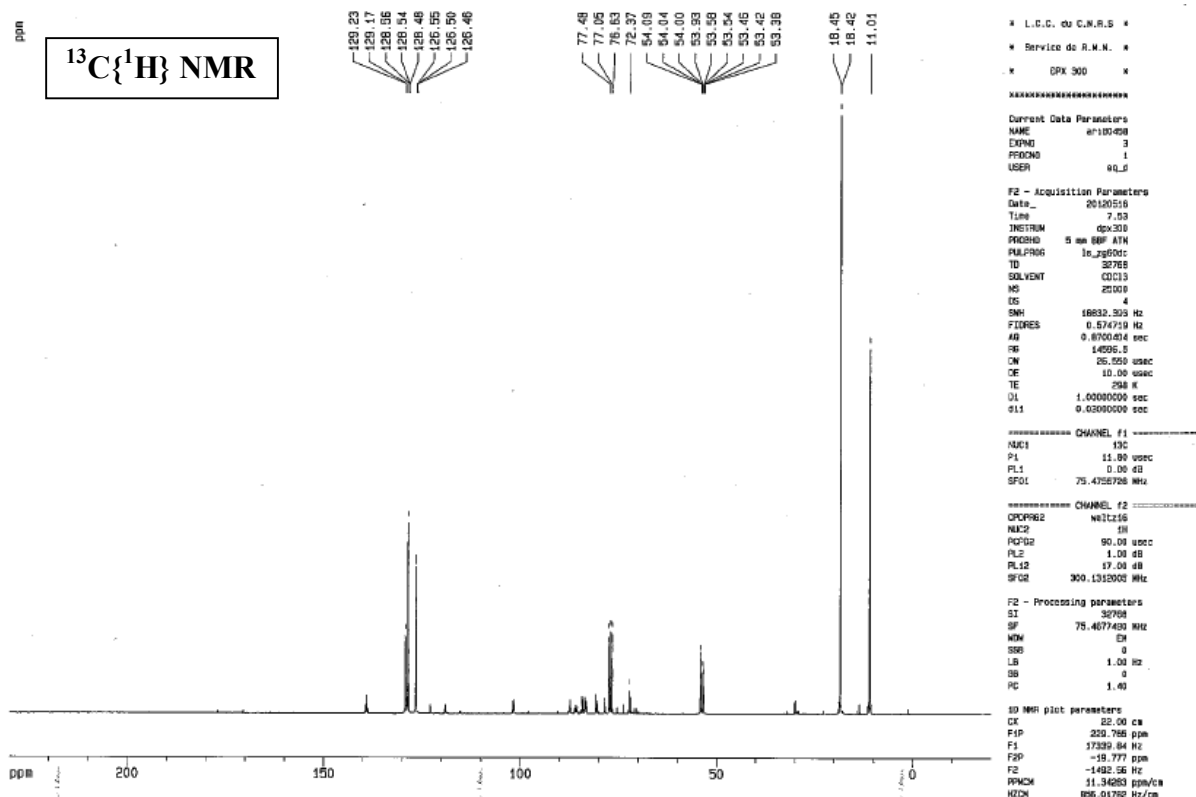

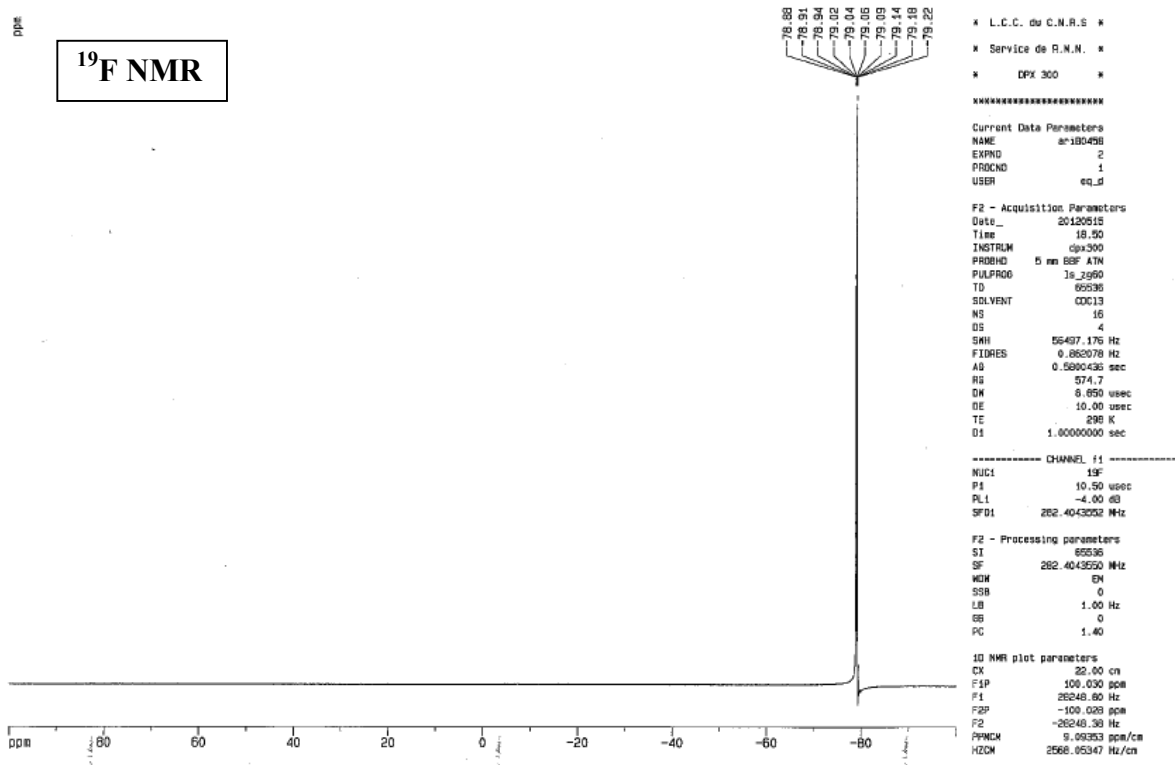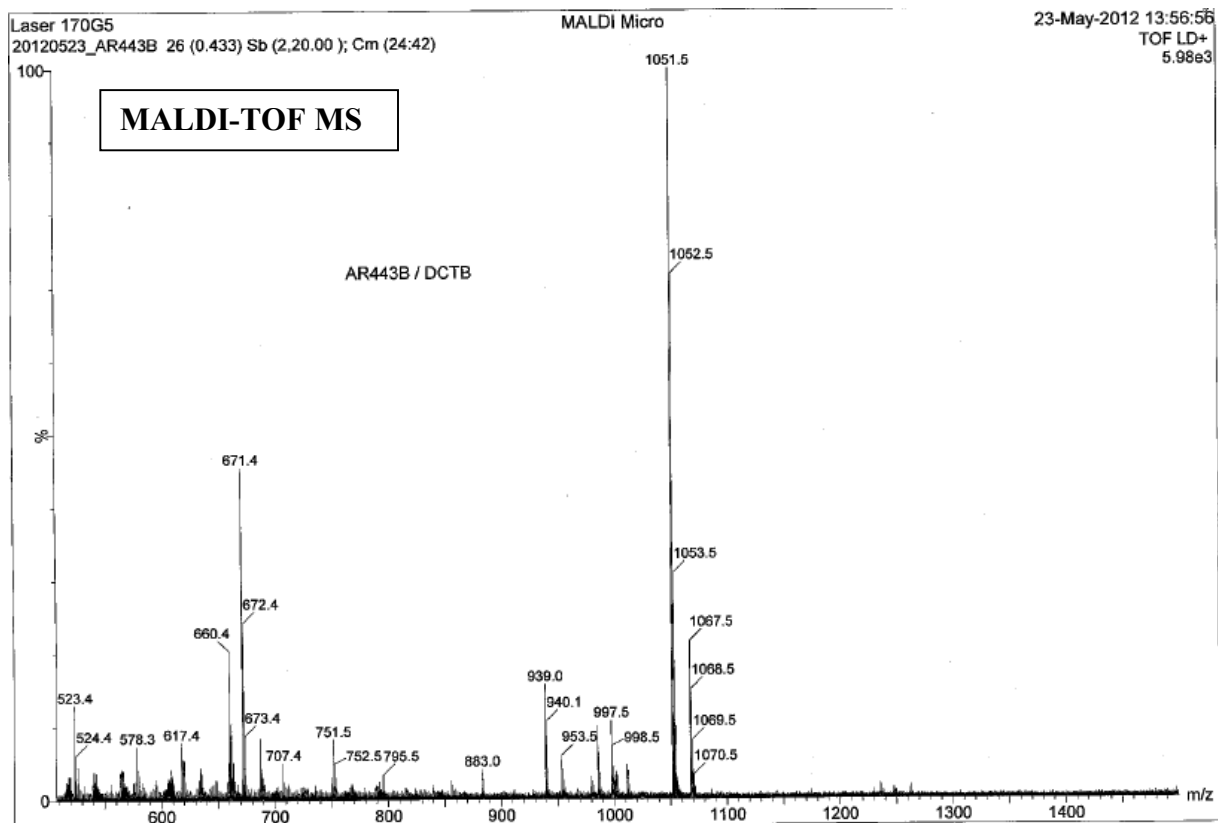

Laser 170G5  
20120523\_AR443B 68 (1.134) Cn (Cen,4, 80.00, Ht); Sb (2,20.00); Cm (62:87)

MALDI Micro

23-May-2012 13:56:56  
TOF LD+  
1.15e+003

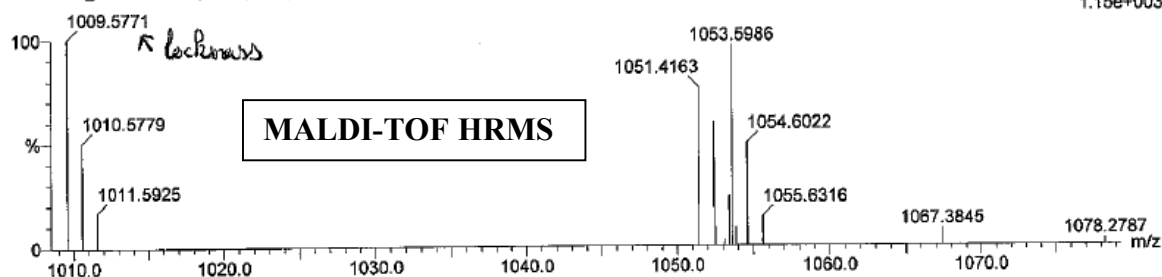

Minimum: -1.5  
Maximum: 5.0 5.0 70.0

| Mass      | Calc. Mass | mDa  | PPM  | DBE  | i-FIT | Formula                  |
|-----------|------------|------|------|------|-------|--------------------------|
| 1051.4163 | 1051.4180  | -1.7 | -1.6 | 25.5 | 1.3   | C59 H63 O6 F7 23Na Si    |
|           | 1051.4211  | -4.8 | -4.6 | 20.5 | 2.9   | C55 H67 O7 F7 23Na Si2   |
|           | 1051.4200  | -3.7 | -3.5 | 24.5 | 3.7   | C58 H66 O6 F6 23Na Si2 ← |
|           | 1051.4184  | -2.1 | -2.0 | 24.5 | 13.2  | C58 H67 O3 F7 23Na Si3   |
|           | 1051.4208  | -4.5 | -4.3 | 27.5 | 16.5  | C60 H66 O3 F7 Si3        |
|           | 1051.4208  | -4.5 | -4.3 | 27.5 | 17.7  | C60 H68 O5 F4 23Na Si3   |

**7h.** 4,7,13,16-tetramethoxy-4,7-diphenyl-1,10-bis(2-phenylethynyl)-13,16-bis(trifluoromethyl)cyclooctadeca-2,5,8,11,14,17-hexayne-1,10-diol

vm715.1  
Day\_H1\_int\_NS\_8 CDCl3 /x/av400pas/data/eq\_d/nmr v.maraval 43

<sup>1</sup>H NMR

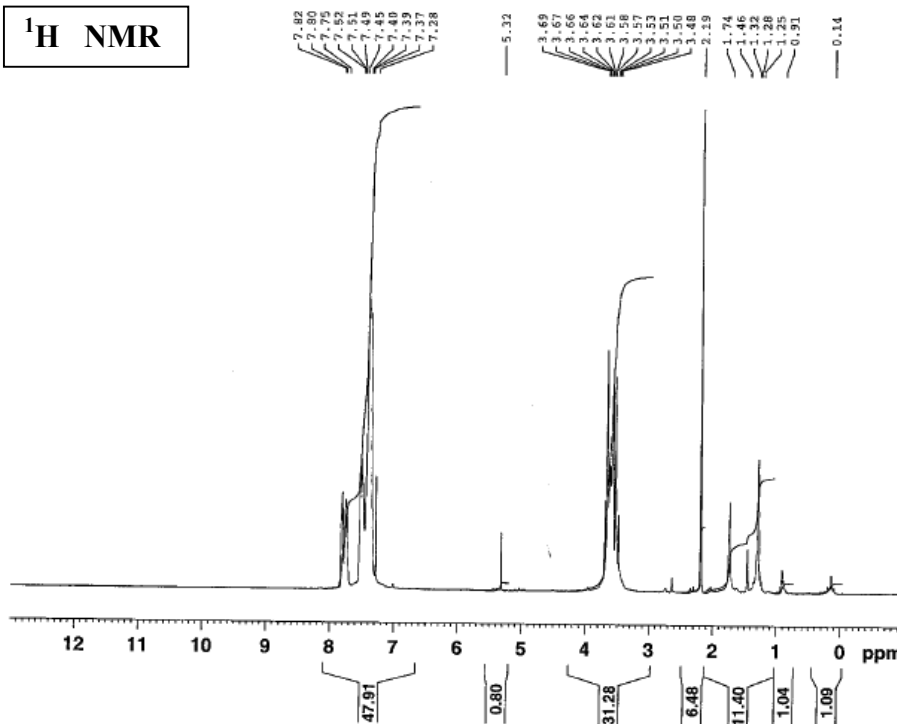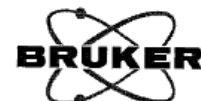

Current Data Parameters  
NAME valG0393  
EXPNO 1  
PROCNO 1

F2 - Acquisition Parameters  
Date\_ 20120731  
Time 15.40  
INSTRUM spect  
PROBHD 5 mm PABBO BB-  
PULPROG ls\_zg60  
TD 65536  
SOLVENT CDCl3  
NS 8  
DS 2  
SWH 5597.015 Hz  
FIDRES 0.085404 Hz  
AQ 5.854595 sec  
RG 64  
DW 89.333 usec  
DE 6.50 usec  
TE 298.0 K  
D1 20.0000000 sec  
TD0 1

===== CHANNEL f1 =====  
NUC1 1H  
P1 13.60 usec  
PLW1 17.0000000 W  
SF01 400.1624010 MHz

F2 - Processing parameters  
SI 131072  
SF 400.1600000 MHz  
WDW EM  
SSB 0  
LB 0.10 Hz  
GB 0  
PC 1.50

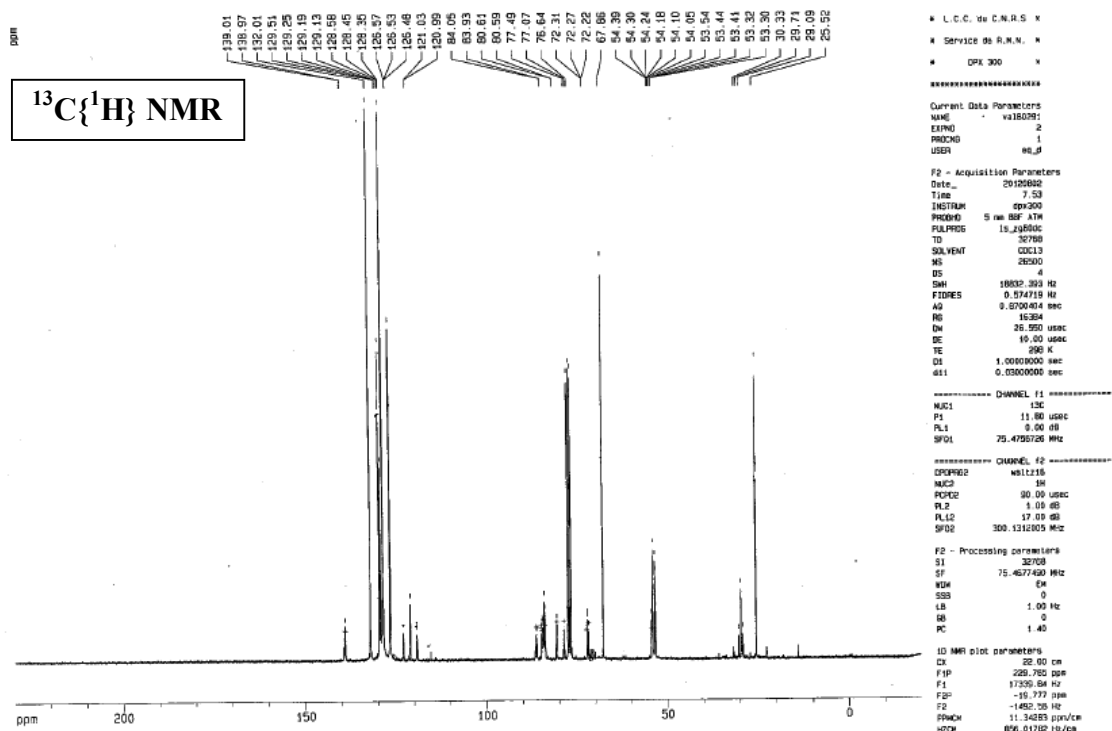

vm715.1  
Day\_F19\_NS\_40 CDC13 /x/av400pas/data/eq\_d/nmr v.maraval 43

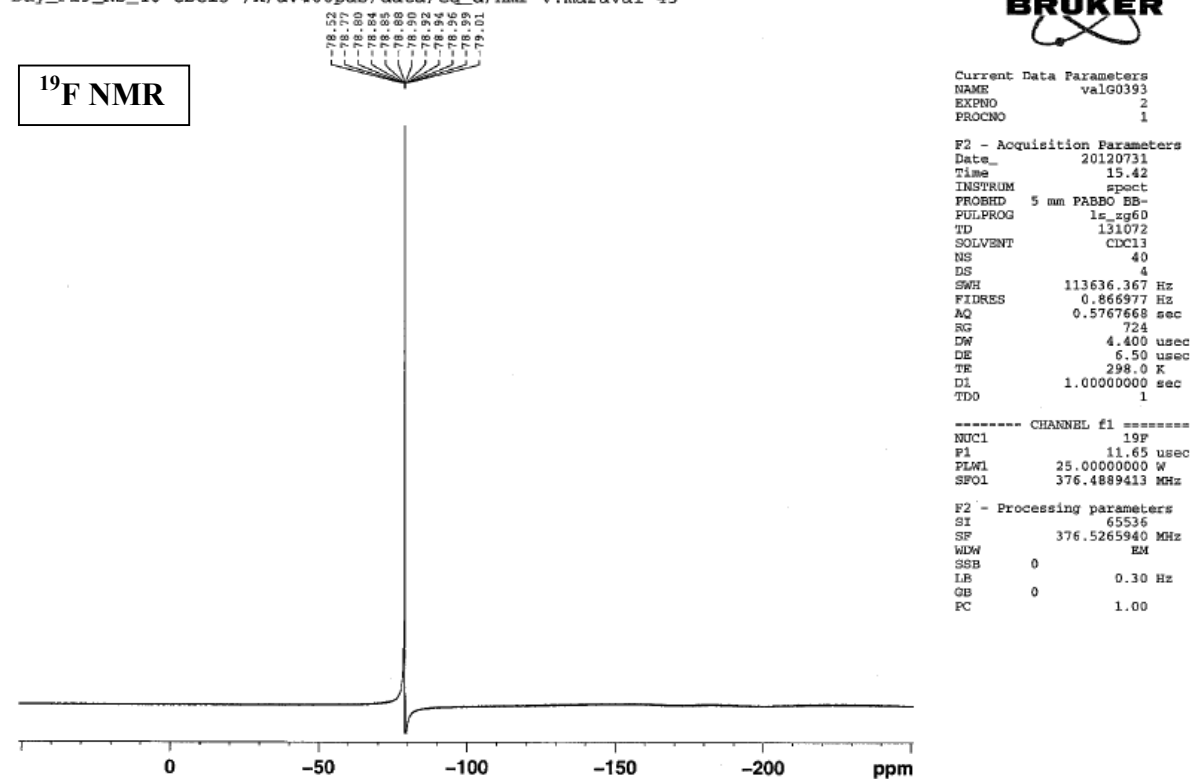



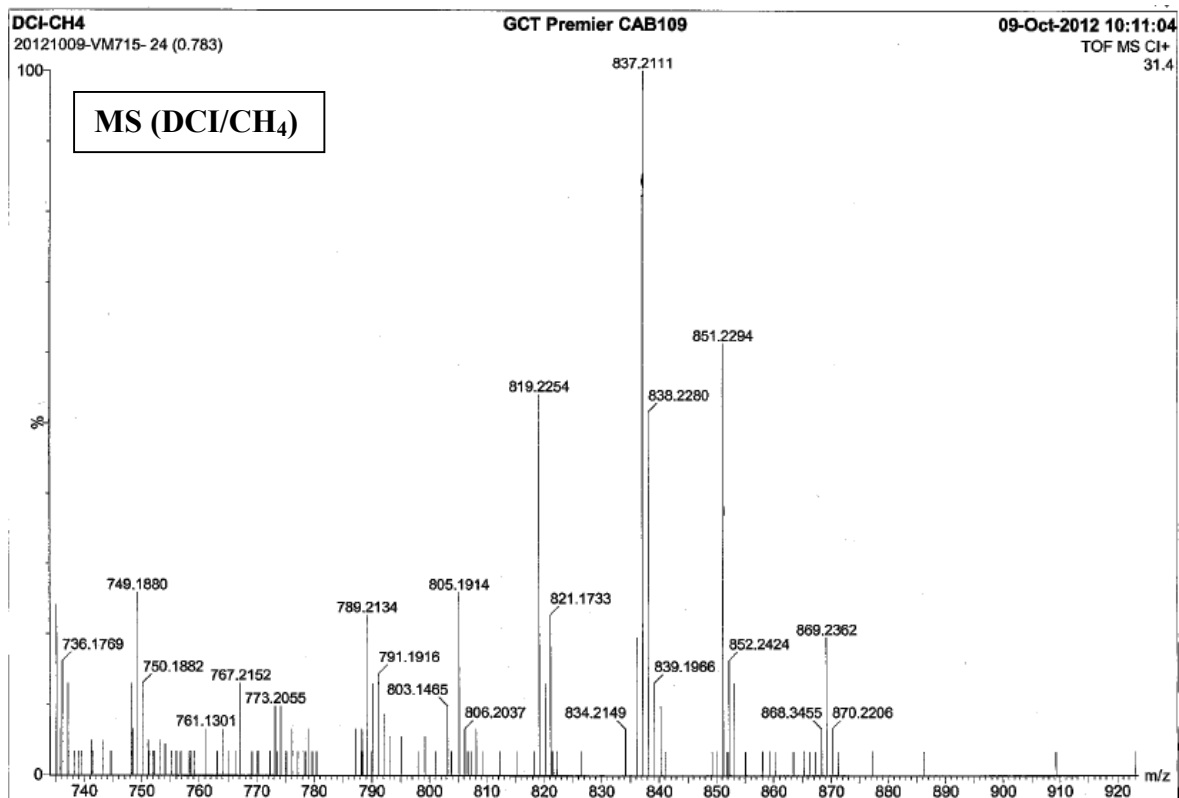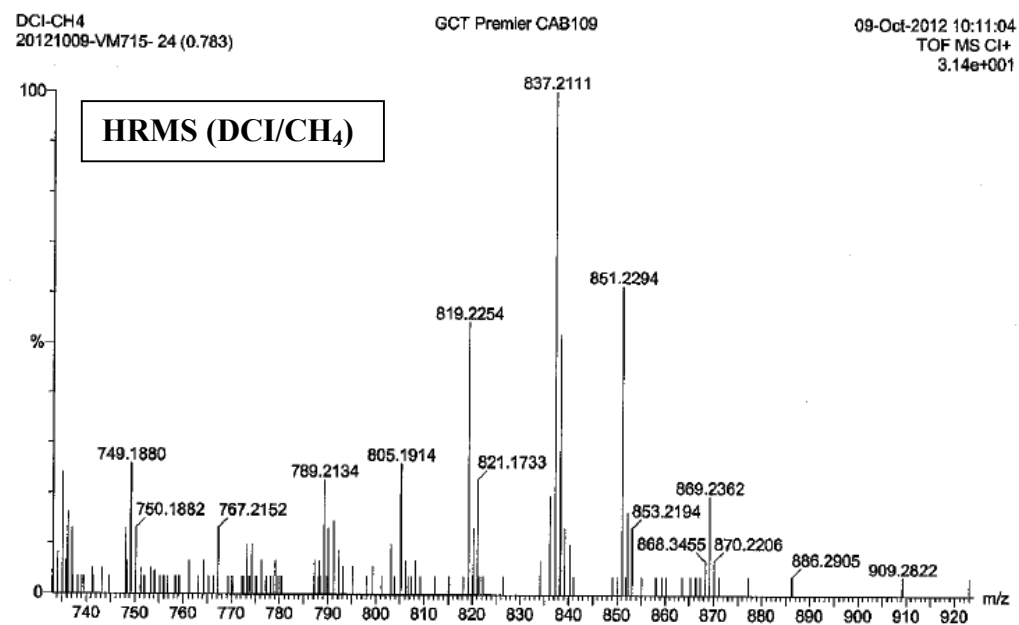

Minimum: -1.5  
Maximum: 50.0

| Mass     | Calc. Mass | mDa  | PPM  | DBE  | i-FIT | Formula        |
|----------|------------|------|------|------|-------|----------------|
| 869.2362 | 869.2385   | -2.3 | -2.6 | 27.5 | 0.2   | C48 H38 O10 F5 |
|          | 869.2374   | -1.2 | -1.4 | 31.5 | 0.3   | C51 H37 O9 F4  |
|          | 869.2338   | 2.4  | 2.8  | 32.5 | 0.3   | C52 H35 O6 F6  |
|          | 869.2362   | 0.0  | 0.0  | 35.5 | 0.3   | C54 H36 O8 F3  |
|          | 869.2326   | 3.6  | 4.1  | 36.5 | 0.4   | C55 H34 O5 F5  |
|          | 869.2387   | -2.5 | -2.9 | 38.5 | 0.4   | C56 H37 O10    |
|          | 869.2351   | 1.1  | 1.3  | 39.5 | 0.4   | C57 H35 O7 F2  |
|          | 869.2315   | 4.7  | 5.4  | 40.5 | 0.4   | C58 H33 O4 F4  |
|          | 869.2339   | 2.3  | 2.6  | 43.5 | 0.5   | C60 H34 O6 F   |
|          | 869.2328   | 3.4  | 3.9  | 47.5 | 0.5   | C63 H33 O5     |

→ MH<sup>+</sup>

**10e.** 1,10-bis[4-(9*H*-carbazol-9-yl)phenyl]-4,7-dimethoxy-4,7-diphenyldeca-2,5,8-triyn-1,10-dione

bi-2.103  
Day\_H1\_int\_NS\_8 CDC13 /x/av400pas/data/eq\_d/nmr i.baglaj 36

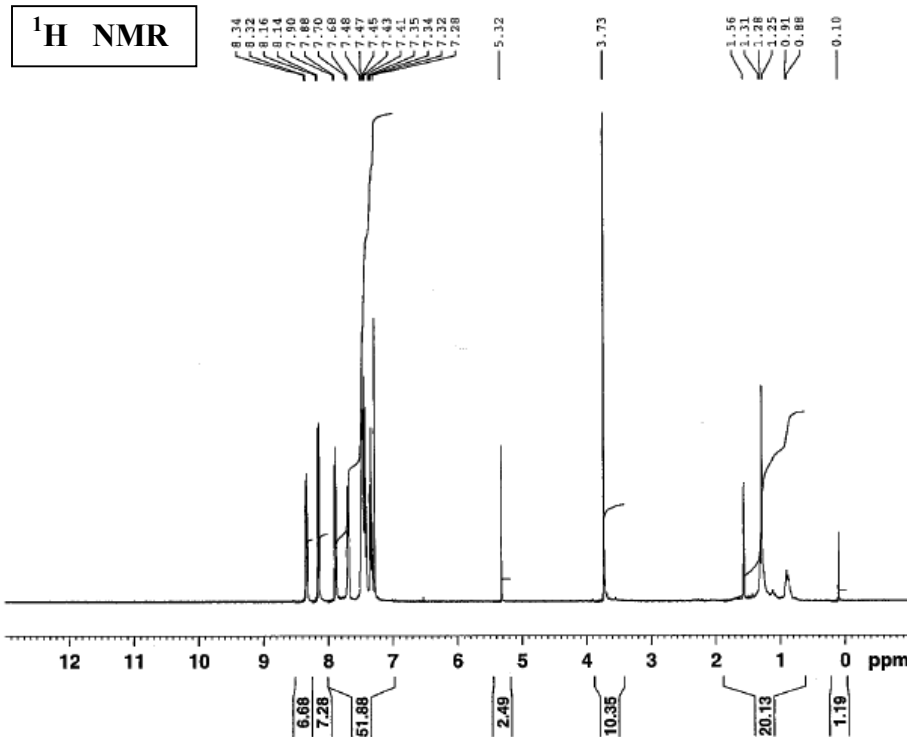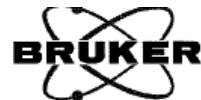

Current Data Parameters  
NAME ibag0434  
EXPNO 1  
PROCNO 1

F2 - Acquisition Parameters  
Date\_ 20120705  
Time 14.57  
INSTRUM spect  
PROBHD 5 mm PABBO BB-  
PULPROG la\_zg60  
TD 65536  
SOLVENT CDC13  
NS 8  
DS 2  
SWH 5597.015 Hz  
FIDRES 0.085404 Hz  
AQ 5.8545995 sec  
RG 114  
DW 89.333 usec  
DE 6.50 usec  
TE 298.0 K  
D1 20.00000000 sec  
TDO 1

===== CHANNEL f1 =====  
NUC1 1H  
P1 13.60 usec  
PLW1 17.00000000 W  
SFO1 400.1624010 MHz

F2 - Processing parameters  
SI 131072  
SF 400.1600000 MHz  
WDW EM  
SSB 0  
LB 0.10 Hz  
GB 0  
PC 1.50

bi-2.103  
Night\_C13\_DECOUPLE\_H1\_NS\_5000 CDC13 /x/av400pas/data/eq\_d/nmr i.baglaj 36

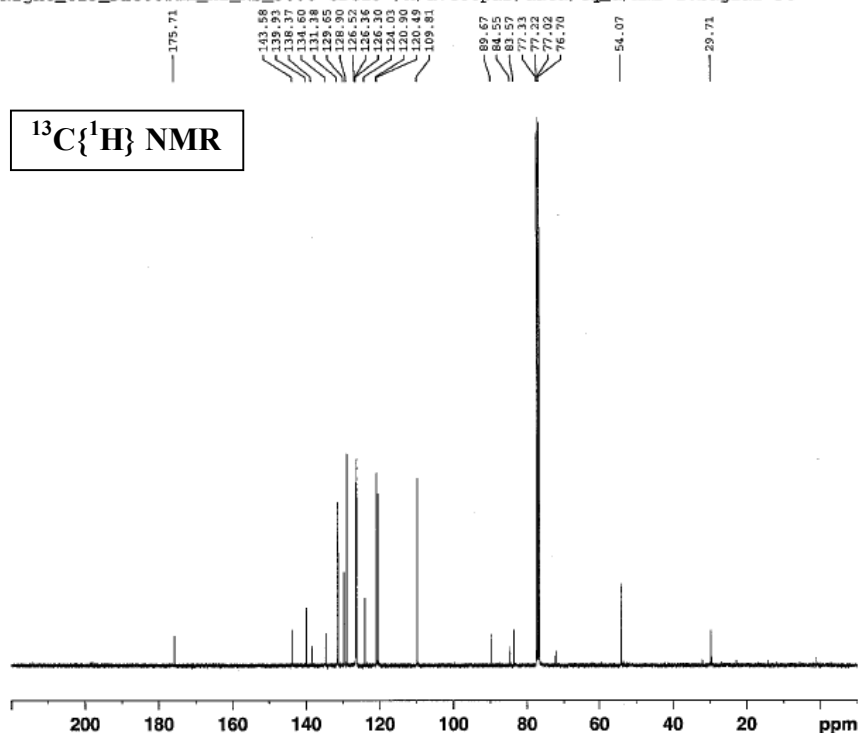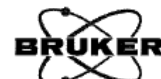

Current Data Parameters  
NAME ibag0434  
EXPNO 2  
PROCNO 1

F2 - Acquisition Parameters  
Date\_ 20120707  
Time 19.40  
INSTRUM spect  
PROBHD 5 mm PABBO BB-  
PULPROG la\_zgdc60  
TD 65536  
SOLVENT CDC13  
NS 5000  
DS 4  
SWH 23148.148 Hz  
FIDRES 0.353213 Hz  
AQ 1.4156276 sec  
RG 2050  
DW 21.600 usec  
DE 6.50 usec  
TE 298.0 K  
D1 1.00000000 sec  
D11 0.03000000 sec  
TDO 1

===== CHANNEL f1 =====  
NUC1 13C  
P1 9.00 usec  
PLW1 70.00000000 W  
SFO1 100.6308781 MHz

===== CHANNEL f2 =====  
CPDPRG2 waltz16  
NUC2 1H  
PCPD2 90.00 usec  
PLW2 17.00000000 W  
PLW12 0.38819000 W  
SFO2 400.1616006 MHz

F2 - Processing parameters  
SI 131072  
SF 100.6203130 MHz  
WDW EM  
SSB 0  
LB 1.00 Hz  
GB 0  
PC 1.50

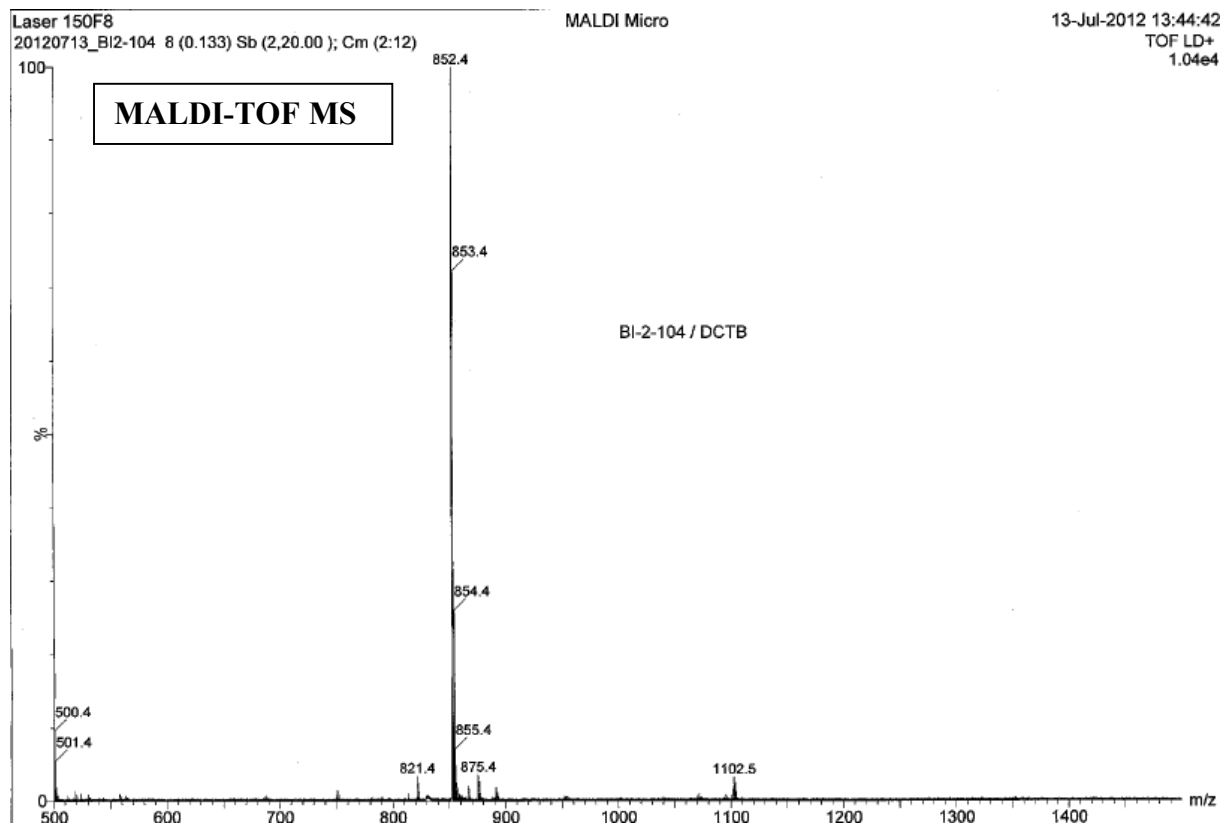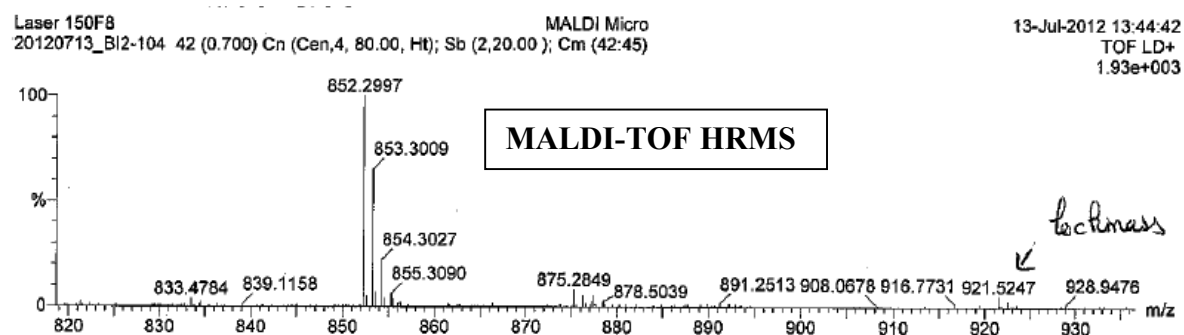

| Minimum: |            |      |      | -1.5 |       |                 |
|----------|------------|------|------|------|-------|-----------------|
| Maximum: |            | 5.0  | 10.0 | 55.0 |       |                 |
| Mass     | Calc. Mass | mDa  | PPM  | DBE  | i-FIT | Formula         |
| 852.2997 | 852.3074   | -7.7 | -9.0 | 37.5 | 1.2   | C56 H42 N3 O6   |
|          | 852.2988   | 0.9  | 1.1  | 42.0 | 1.4   | C60 H40 N2 O4 ← |
|          | 852.3015   | -1.8 | -2.1 | 46.5 | 6.2   | C63 H38 N3 O    |
|          | 852.3028   | -3.1 | -3.6 | 46.0 | 9.4   | C65 H40 O2      |

**10f. 1,10-bis[4-(1*H*-indol-1-yl)phenyl]-4,7-dimethoxy-4,7-diphenyldeca-2,5,8-triyn-1,10-dione**

bi-2.113  
Day\_H1\_int\_NS\_8 CDCl3 /x/av400pas/data/eq\_d/nmr i.baglai 26

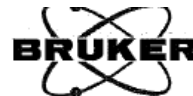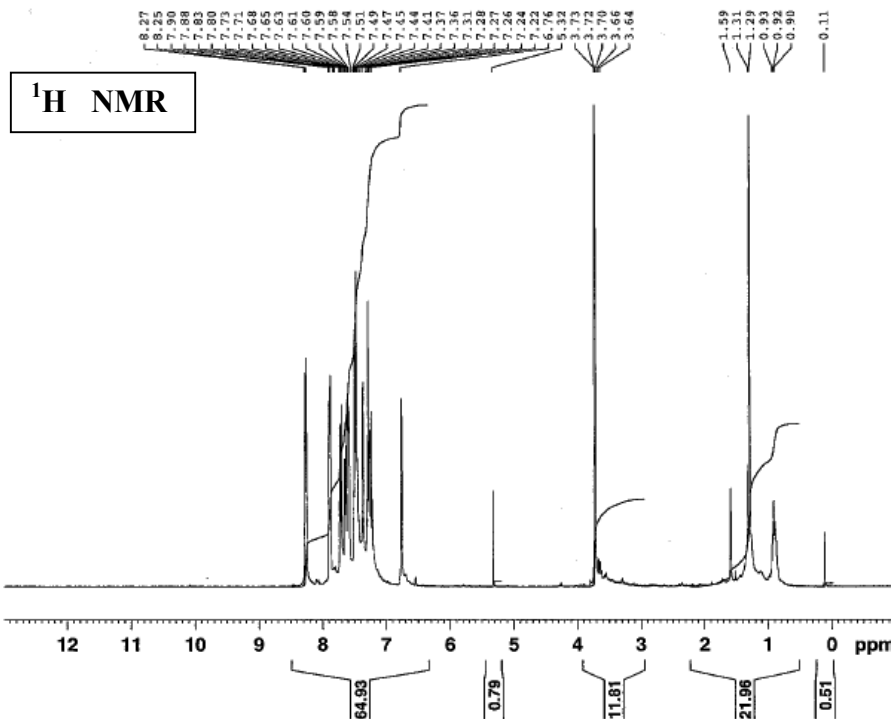

Current Data Parameters  
NAME iba0464  
EXPNO 1  
PROCNO 1

F2 - Acquisition Parameters  
Date\_ 20120720  
Time 13.01  
INSTRUM spect  
PROBHD 5 mm PABBO BB-  
PULPROG ls\_zg60  
TD 65536  
SOLVENT CDCl3  
NS 8  
DS 2  
SWH 5597.015 Hz  
FIDRES 0.085404 Hz  
AQ 5.8545995 sec  
RG 64  
DW 89.333 usec  
DE 6.50 usec  
TE 298.0 K  
D1 20.00000000 sec  
TD0 1

===== CHANNEL f1 =====  
NUC1 1H  
P1 13.60 usec  
PLW1 17.00000000 W  
SFO1 400.1624010 MHz

F2 - Processing parameters  
SI 131072  
SF 400.1600000 MHz  
WDW EM  
SSB 0  
LB 0.10 Hz  
GB 0  
PC 1.50

Laser 200B9  
20120906\_BI-2-113\_HR- 11 (0.185) Sb (2,20.00); Cm (9:21)

MALDI Micro

06-Sep-2012 14:16:59  
TOF LD+  
1.86e4

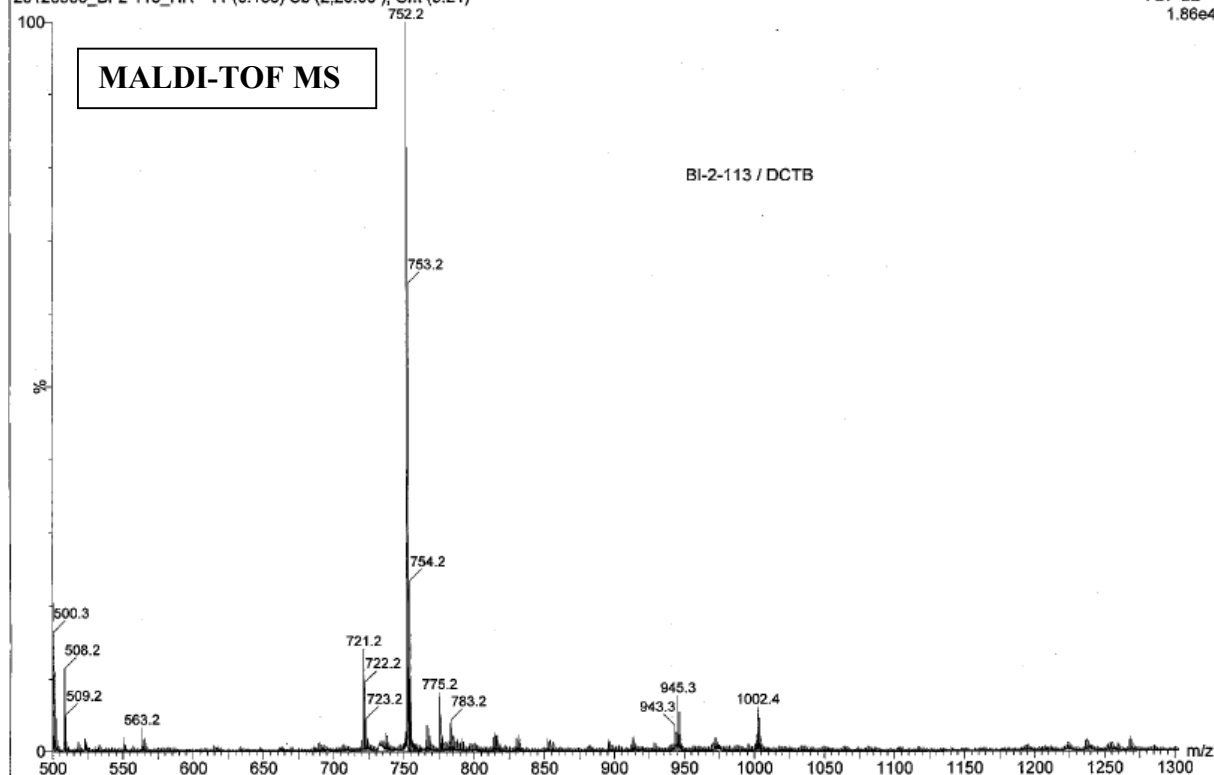

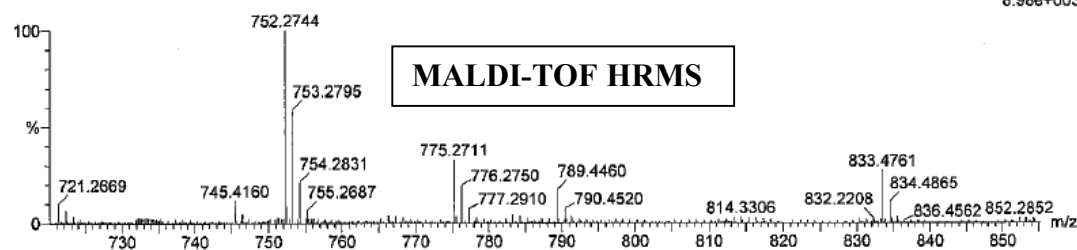

Minimum: -1.5  
Maximum: 55.0

| Mass     | Calc. Mass | mDa  | PPM  | DBE  | i-FIT | Formula       |
|----------|------------|------|------|------|-------|---------------|
| 752.2744 | 752.2801   | -5.7 | -7.6 | 35.5 | 16.2  | C53 H38 N O4  |
|          | 752.2715   | 2.9  | 3.9  | 40.0 | 16.6  | C57 H36 O2    |
|          | 752.2702   | 4.2  | 5.6  | 40.5 | 17.1  | C55 H34 N3 O  |
|          | 752.2814   | -7.0 | -9.3 | 40.5 | 19.6  | C54 H34 N5    |
|          | 752.2688   | 5.6  | 7.4  | 41.0 | 21.2  | C53 H32 N6    |
|          | 752.2675   | 6.9  | 9.2  | 36.0 | 22.4  | C52 H36 N2 O4 |
|          | 752.2787   | -4.3 | -5.7 | 36.0 | 23.5  | C51 H36 N4 O3 |
|          | 752.2774   | -3.0 | -4.0 | 31.0 | 29.4  | C50 H40 O7    |
|          | 752.2774   | -3.0 | -4.0 | 36.5 | 34.7  | C49 H34 N7 O2 |
|          | 752.2761   | -1.7 | -2.3 | 31.5 | 44.6  | C48 H38 N3 O6 |
|          | 752.2747   | -0.3 | -0.4 | 32.0 | 64.0  | C46 H36 N6 O5 |
|          | 752.2720   | 2.4  | 3.2  | 27.5 | 112.3 | C43 H38 N5 O8 |

# 10h. 6,9-dimethoxy-1,6,9,14-tetraphenyltetradeca-1,4,7,10,13-pentayne-3,12-dione

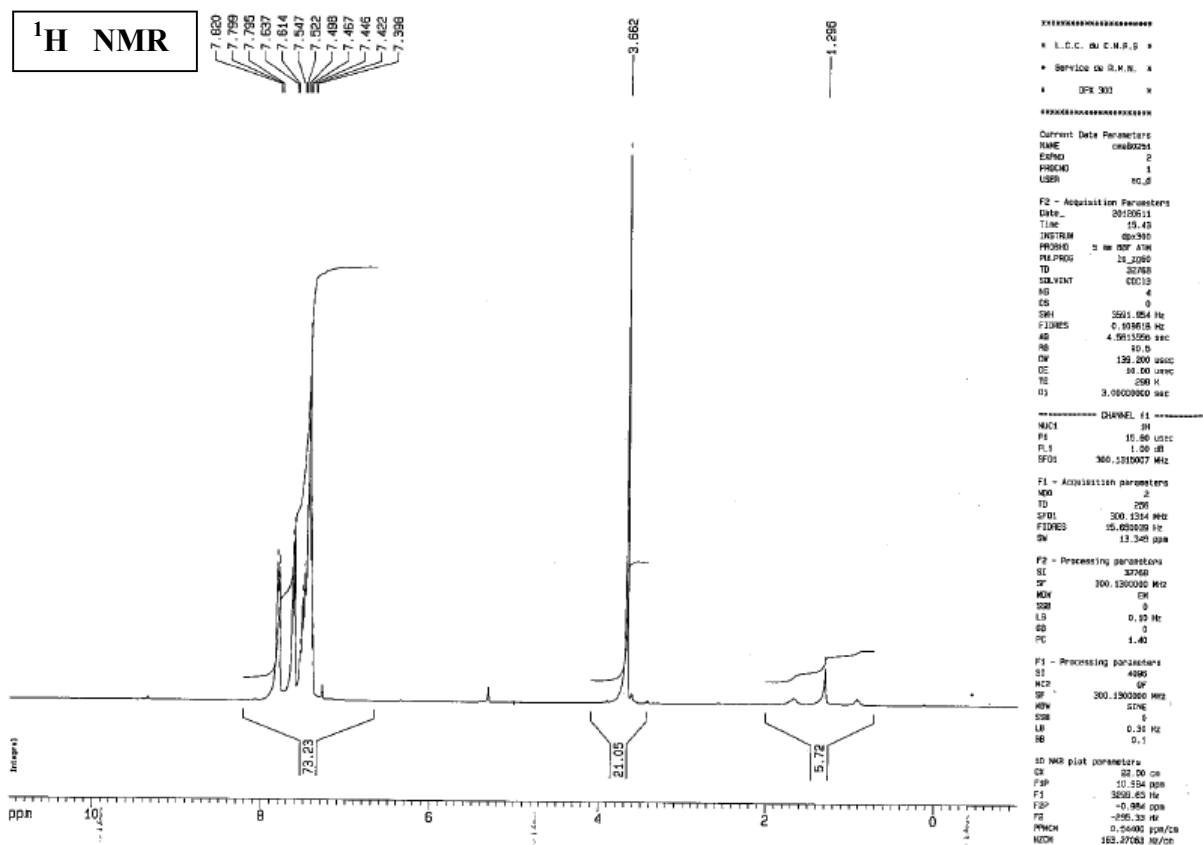

vm694  
Night\_C13\_DECOUPLE\_H1\_NS\_5000 CDC13 /x/av400pas/data/eq\_d/nmr v.maraval 23

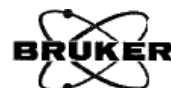

**$^{13}\text{C}\{^1\text{H}\}$  NMR**

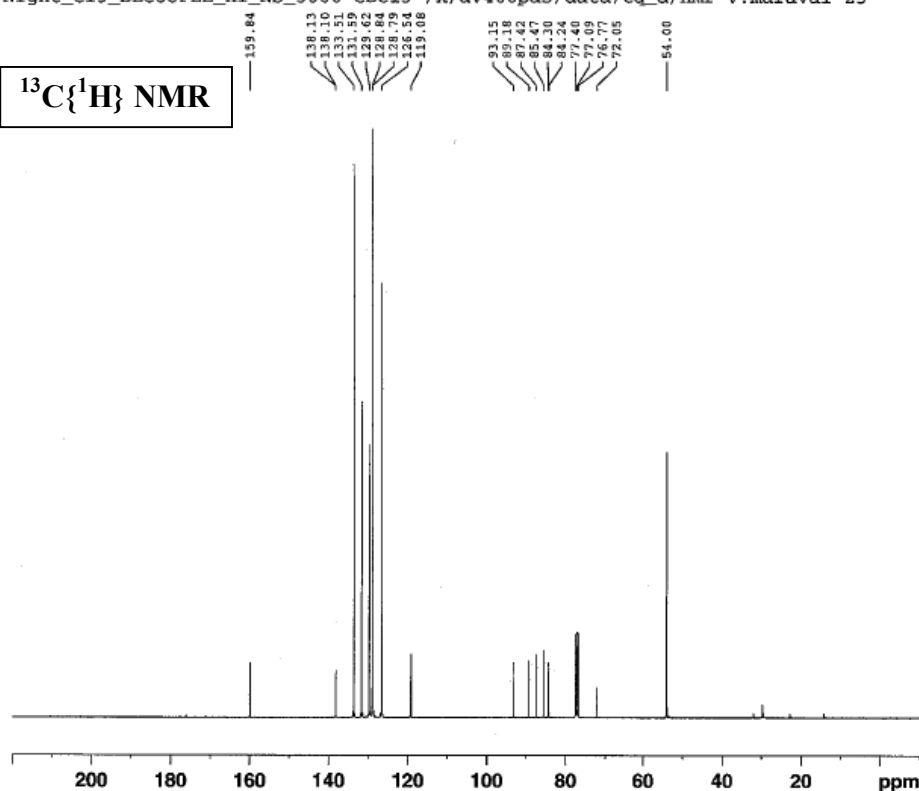

Current Data Parameters  
NAME valG0340  
EXPNO 1  
PROCNO 1

F2 - Acquisition Parameters  
Date\_ 20120611  
Time 22.31  
INSTRUM spect  
PROBHD 5 mm PABBO BB-  
PULPROG ls\_zgdc60  
TD 65536  
SOLVENT CDC13  
NS 5000  
DS 4  
SWH 23148.148 Hz  
FIDRES 0.353213 Hz  
AQ 1.4156276 sec  
RG 2050  
DW 21.600 usec  
DE 6.50 usec  
TE 298.0 K  
D1 1.00000000 sec  
D11 0.03000000 sec  
TD0 1

===== CHANNEL f1 =====  
NUC1 13C  
P1 9.00 usec  
PLW1 70.00000000 W  
SFO1 100.6308781 MHz

===== CHANNEL f2 =====  
CPDPRG2 waltz16  
NUC2 1H  
PCPD2 90.00 usec  
PLW2 17.00000000 W  
PLW12 0.38819000 W  
SFO2 400.1616006 MHz

F2 - Processing parameters  
SI 131072  
SF 100.6203130 MHz  
WDW EM  
SSB 0  
LB 1.00 Hz  
GB 0  
PC 1.50

VM694 #13-14 RT: 0.30-0.32 AV: 2 NL: 1.16E5  
T: + c Full ms [100.00-800.00]

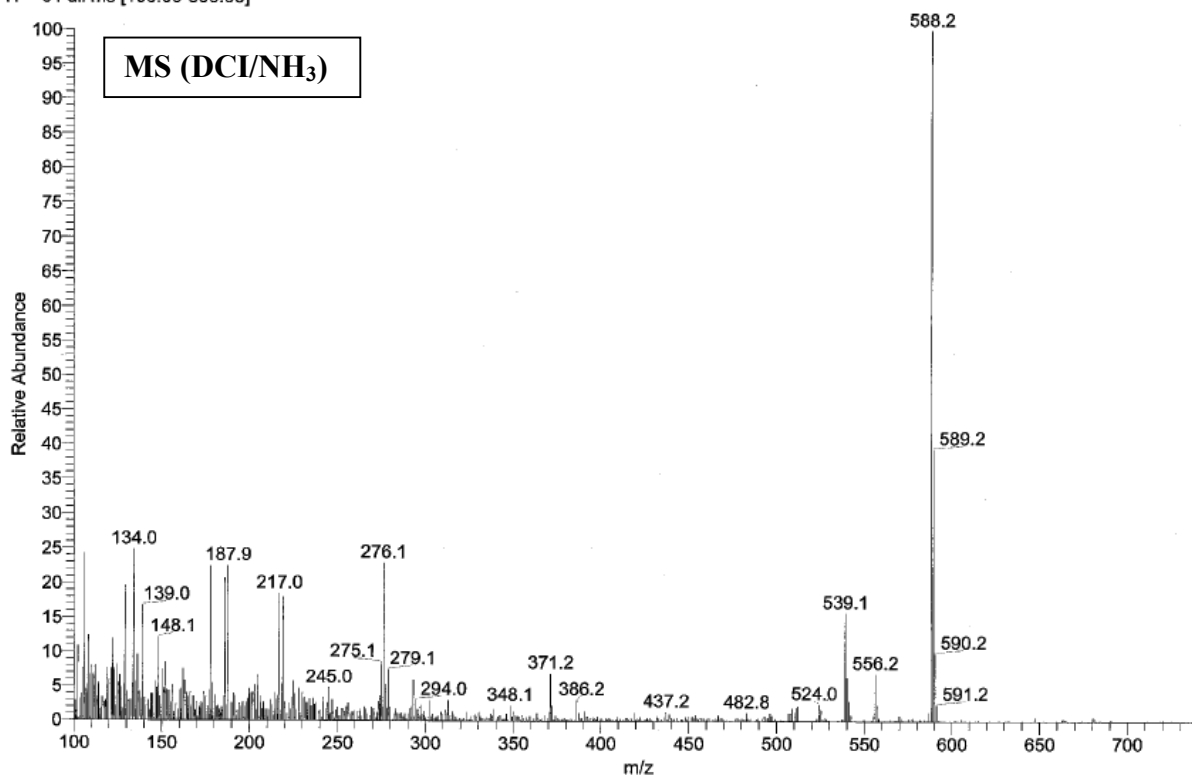

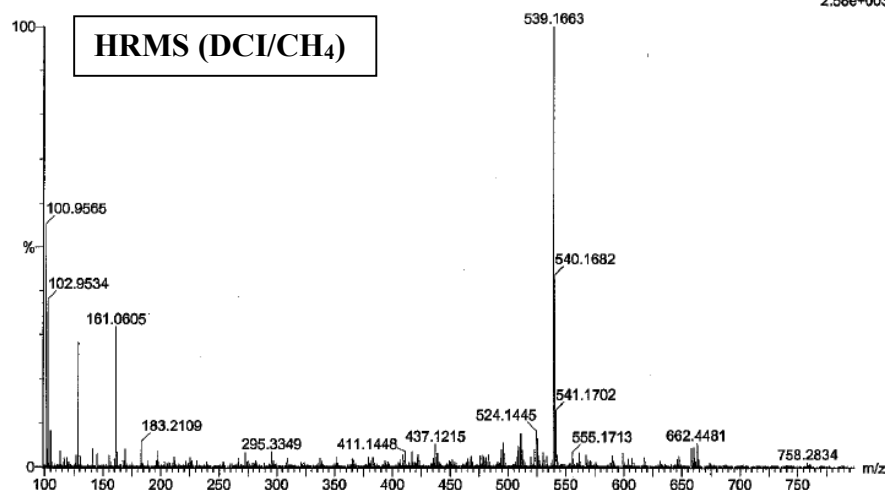

Minimum:  
Maximum:

1.3 5.0 -1.5  
50.0

| Mass     | Calc. Mass | mDa  | PPM  | DBE  | i-FIT | Formula        |
|----------|------------|------|------|------|-------|----------------|
| 539.1663 | 539.1674   | -1.1 | -2.0 | 33.0 | 7.0   | C42 H21 N      |
|          | 539.1647   | 1.6  | 3.0  | 28.5 | 7.3   | C39 H23 O3     |
|          | 539.1679   | -1.6 | -3.0 | 20.5 | 51.9  | C28 H23 N6 O6  |
|          | 539.1666   | -0.3 | -0.6 | 15.5 | 63.5  | C27 H27 N2 O10 |
|          | 539.1666   | -0.3 | -0.6 | 21.0 | 64.7  | C26 H21 N9 O5  |
|          | 539.1652   | 1.1  | 2.0  | 16.0 | 77.7  | C25 H25 N5 O9  |
|          | 539.1639   | 2.4  | 4.5  | 16.5 | 93.7  | C23 H23 N8 O8  |

— MH<sup>+</sup>-CH<sub>3</sub>OH

# **11f. 1,10-bis[4-(1H-indol-1-yl)phenyl]-4,7-dimethoxy-4,7-diphenyldeca-2,5,8-triyn-1,10-diol**

bi-2.110.  
Night\_H1\_int\_NS\_8 CDCl<sub>3</sub> /x/av400pas/data/eq\_d/nmr i.baglai 22

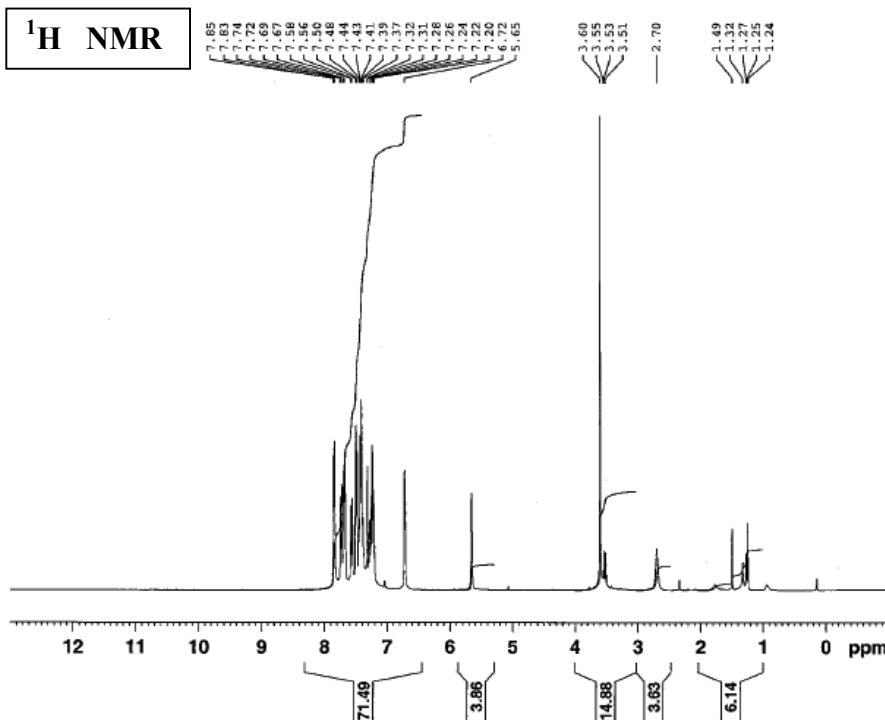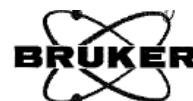

Current Data Parameters  
NAME ibag0458  
EXPNO 2  
PROCNO 1

F2 - Acquisition Parameters  
Date\_ 20120719  
Time 4.10  
INSTRUM spect  
PROBHD 5 mm PABBO BB-  
PULPROG ls\_zg60  
TD 65536  
SOLVENT CDCl<sub>3</sub>  
NS 8  
DS 2  
SWH 5597.015 Hz  
FIDRES 0.085404 Hz  
AQ 5.8545995 sec  
RG 40.3  
DW 89.333 usec  
DE 6.50 usec  
TE 298.0 K  
D1 20.00000000 sec  
TD0 1

===== CHANNEL f1 =====  
NUC1 1H  
P1 13.60 usec  
PLW1 17.00000000 W  
SFO1 400.1624010 MHz

F2 - Processing parameters  
SI 131072  
SF 400.1600000 MHz  
WDW EM  
SSB 0  
LB 0.10 Hz  
GB 0  
PC 1.50

bi-2.110.  
Night\_C13\_DECOUPLE\_H1\_NS\_5000 CDCl3 /x/av400pas/data/eq\_d/nmr i.baglai 22

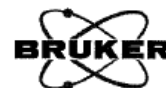

# $^{13}\text{C}\{^1\text{H}\}$ NMR

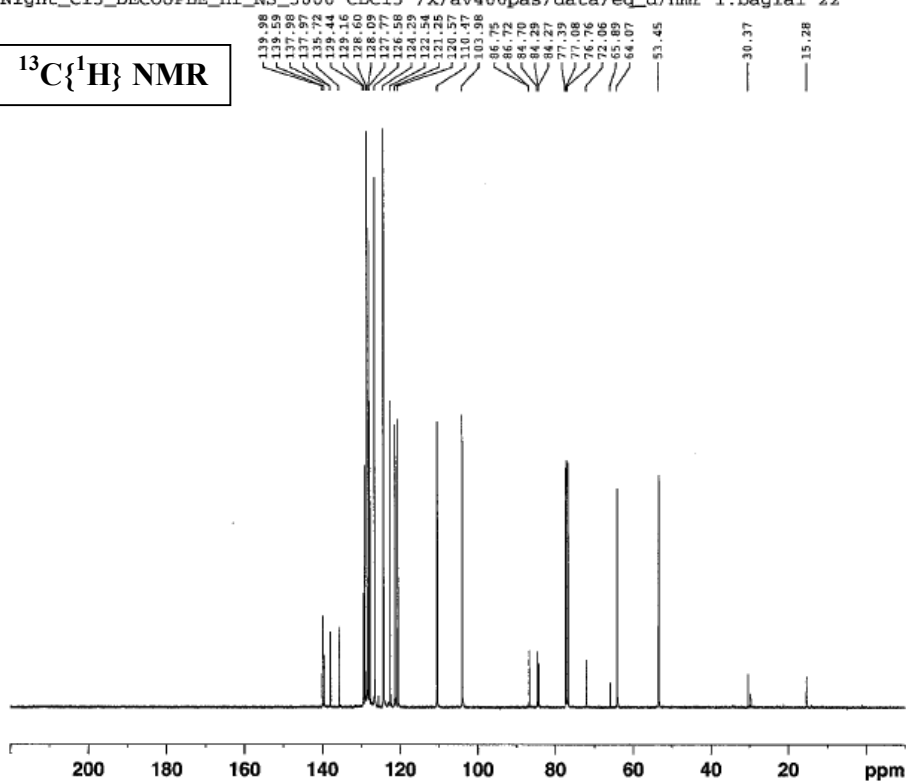

Current Data Parameters  
NAME ibaG0458  
EXPNO 1  
PROCNO 1

F2 - Acquisition Parameters  
Date\_ 20120719  
Time 4.04  
INSTRUM spect  
PROBHD 5 mm PABBO BB-  
PULPROG 1s\_zgdc60  
TD 65536  
SOLVENT CDCl3  
NS 5000  
DS 4  
SWH 23148.148 Hz  
FIDRES 0.353213 Hz  
AQ 1.4156276 sec  
RG 2050  
DW 21.600 usec  
DE 6.50 usec  
TE 298.0 K  
D1 1.00000000 sec  
D11 0.03000000 sec  
TD0 1

===== CHANNEL f1 =====  
NUC1  $^{13}\text{C}$   
P1 9.00 usec  
PLW1 70.00000000 W  
SFO1 100.6308781 MHz

===== CHANNEL f2 =====  
CPDPRG2 waltz16  
NUC2  $^1\text{H}$   
PCPD2 90.00 usec  
PLW2 17.00000000 W  
PLM12 0.38819000 W  
SFO2 400.1616006 MHz

F2 - Processing parameters  
SI 131072  
SF 100.6203130 MHz  
WDW EM  
SSB 0  
LB 1.00 Hz  
GB 0  
PC 1.50

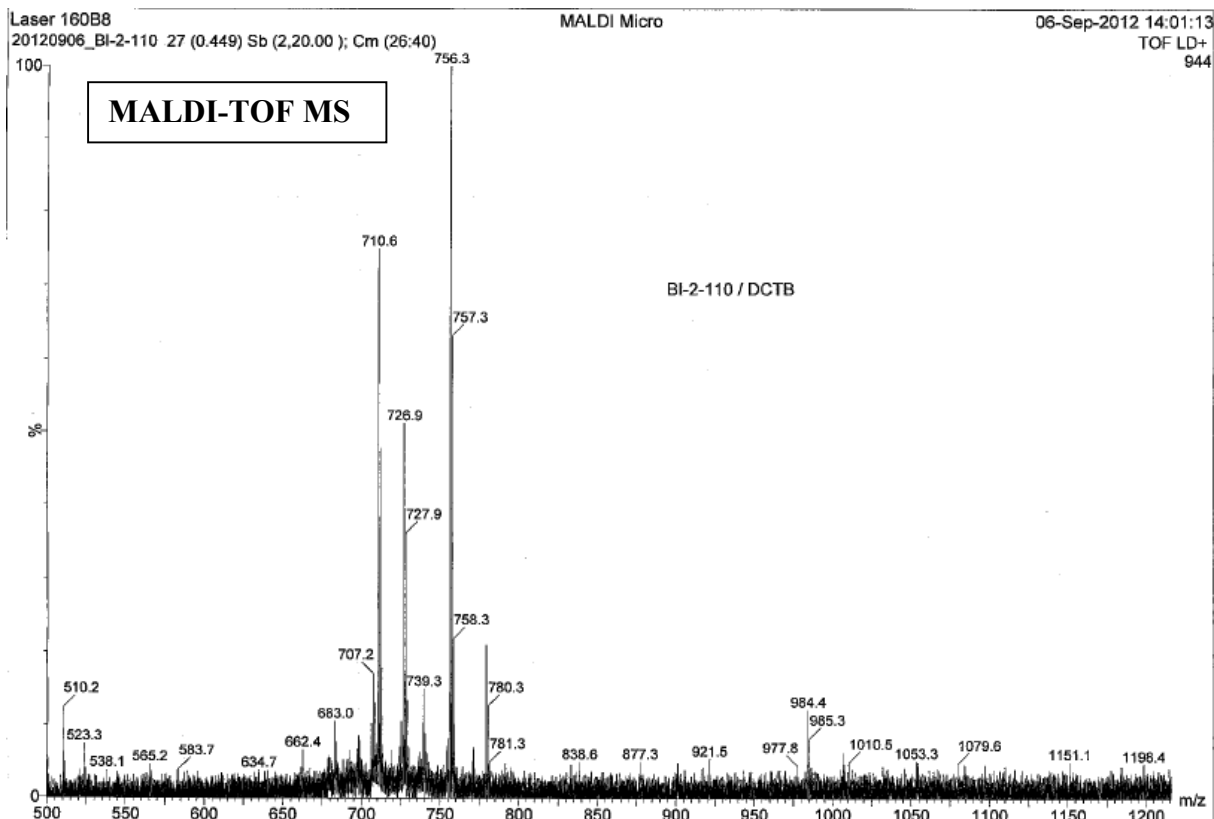



0 V  
20120906\_BI-2-110\_HR- 22 (0.368) Cn (Cen,4, 80.00, Ht); Sb (2,20.00); Cm (22:24)

MALDI Micro

# MALDI-TOF HRMS

06-Sep-2012 14:23:17  
TOF LD+  
2.38e+002

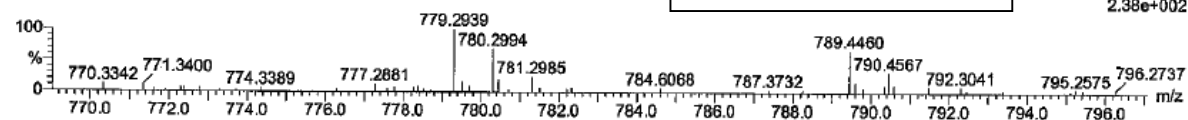

Minimum: -1.5  
Maximum: 3.0 10.0 50.0

| Mass     | Calc. Mass | mDa  | PPM  | DBE  | i-FIT | i-FIT (Norm) | Formula            |
|----------|------------|------|------|------|-------|--------------|--------------------|
| 779.2939 | 779.2950   | -1.1 | -1.4 | 40.5 | 37.7  | 1.3          | C59 H39 O2         |
|          | 779.2937   | 0.2  | 0.3  | 41.0 | 37.8  | 1.5          | C57 H37 N3 O       |
|          | 779.2926   | 1.3  | 1.7  | 37.5 | 38.1  | 1.7          | C57 H40 O2 23Na    |
|          | 779.2913   | 2.6  | 3.3  | 38.0 | 38.6  | 2.3          | C55 H38 N3 O 23Na  |
|          | 779.2910   | 2.9  | 3.7  | 36.5 | 38.8  | 2.5          | C54 H39 N2 O4      |
|          | 779.2896   | 4.3  | 5.5  | 37.0 | 39.6  | 3.3          | C52 H37 N5 O3      |
|          | 779.2971   | -3.2 | -4.1 | 29.0 | 40.0  | 3.7          | C48 H42 N3 O6 23Na |
|          | 779.2998   | -5.9 | -7.6 | 33.5 | 40.2  | 3.9          | C51 H40 N4 O3 23Na |
|          | 779.2886   | 5.3  | 6.8  | 33.5 | 40.3  | 3.9          | C52 H40 N2 O4 23Na |
|          | 779.2995   | -5.6 | -7.2 | 32.0 | 40.3  | 3.9          | C50 H41 N3 O6      |
|          | 779.3012   | -7.3 | -9.4 | 33.0 | 40.5  | 4.1          | C53 H42 N O4 23Na  |
|          | 779.2872   | 6.7  | 8.6  | 34.0 | 41.2  | 4.9          | C50 H38 N5 O3 23Na |
|          | 779.2870   | 6.9  | 8.9  | 32.5 | 41.5  | 5.2          | C49 H39 N4 O6      |

## 11h. 6,9-dimethoxy-1,6,9,14-tetraphenyltetradeca-1,4,7,10,13-pentayne-3,12-diol

vm693.3.2  
Day\_H1\_int\_NS\_8 CDCl3 /x/av400pas/data/eq\_d/nmr v.maraval 1

### <sup>1</sup>H NMR

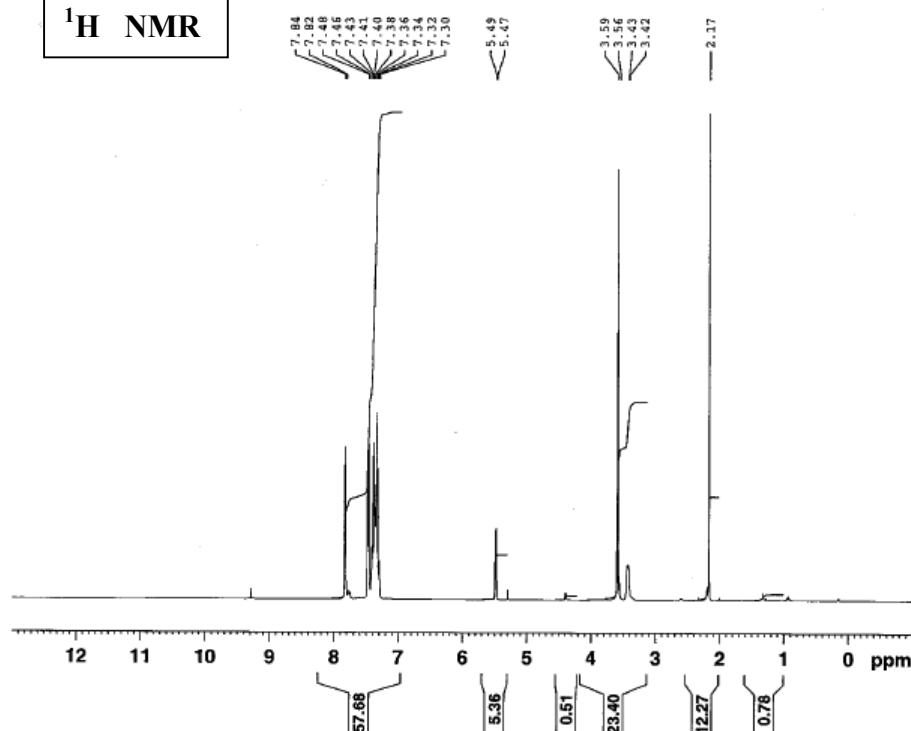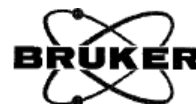

Current Data Parameters  
NAME val60339  
EXPNO 1  
PROCNO 1

F2 - Acquisition Parameters  
Date\_ 20120608  
Time 17.10  
INSTRUM spect  
PROBHD 5 mm PABBO BB-  
PULPROG 1s\_zg60  
TD 65536  
SOLVENT CDCl3  
NS 8  
DS 2  
SWH 5597.015 Hz  
FIDRES 0.085404 Hz  
AQ 5.8545995 sec  
RG 14.2  
DW 89.333 usec  
DE 6.50 usec  
TE 298.0 K  
D1 20.00000000 sec  
TD0 1

===== CHANNEL f1 =====  
NUC1 1H  
P1 13.60 usec  
PLW1 17.00000000 W  
SFO1 400.1624010 MHz

F2 - Processing parameters  
SI 131072  
SF 400.1600000 MHz  
WDW EM  
SSB 0  
LB 0.10 Hz  
GB 0  
PC 1.50

vm693.3.2  
Night\_C13\_JMOD\_H1\_NS\_3000 CDC13 /x/av400pas/data/eq\_d/nmr v.maraval 1

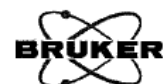

# $^{13}\text{C}\{^1\text{H}\}$ NMR

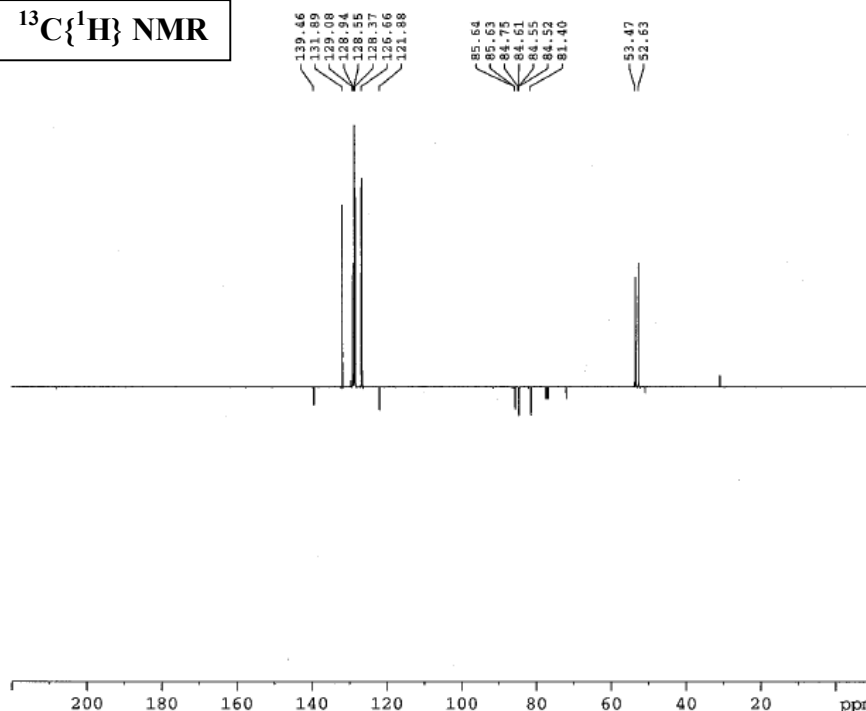

Current Data Parameters  
NAME val0339  
EXPNO 3  
PROCNO 1

F2 - Acquisition Parameters  
Date\_ 20120609  
Time 15.22  
INSTRUM spect  
PROBHD 5 mm PABBO BB-  
PULPROG 1s\_jmod  
TD 65536  
SOLVENT CDC13  
NS 3000  
DS 4  
SWH 23148.148 Hz  
FIDRES 0.353213 Hz  
AQ 1.4156276 sec  
RG 2050  
DW 21.600 usec  
DE 6.50 usec  
TE 298.0 K  
CNST2 145.0000000  
CNST1 1.0000000  
DL 1.0000000 sec  
DZ0 0.00689655 sec  
TD0 1

===== CHANNEL f1 =====  
NUC1 13C  
P1 9.00 usec  
P2 18.00 usec  
PLW1 70.0000000 W  
SFO1 100.6308781 MHz

===== CHANNEL f2 =====  
CPOPRG2 waltz16  
NUC2 1H  
PCPD2 90.00 usec  
PLW2 17.0000000 W  
PLW12 0.38819000 W  
SFO2 400.1616006 MHz

F2 - Processing parameters  
SI 131072  
SF 100.6203130 MHz  
WDW EM  
SSB 0  
LB 1.00 Hz  
GB 0  
PC 1.50

DCI-CH4

20120615-VM693 16 (0.517) Cm (16-40x5.000)

GCT Premier CAB109

15-Jun-2012 09:02:15

TOF MS Cl+  
651

# MS (DCI/CH4)

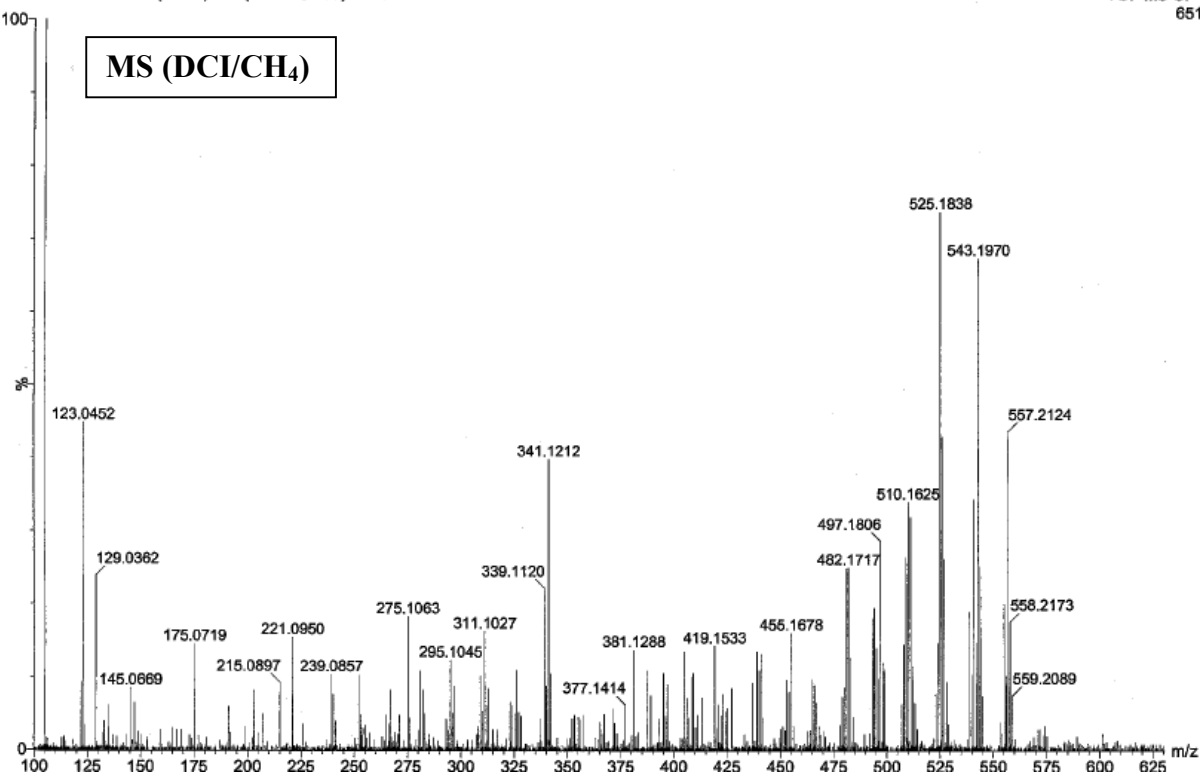

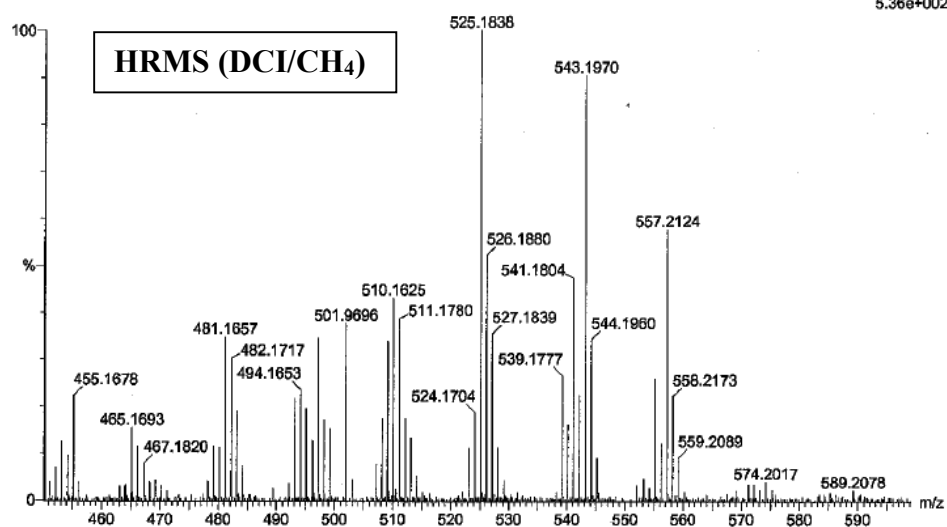

Minimum:  
Maximum:

1.3 5.0 -1.5  
50.0

| Mass     | Calc. Mass | mDa  | PPM  | DBE  | i-FIT | Formula        |
|----------|------------|------|------|------|-------|----------------|
| 557.2124 | 557.2117   | 0.7  | 1.3  | 26.5 | 4.2   | C40 H29 O3     |
|          | 557.2103   | 2.1  | 3.8  | 27.0 | 4.5   | C38 H27 N3 O2  |
|          | 557.2144   | -2.0 | -3.6 | 31.0 | 5.0   | C43 H27 N      |
|          | 557.2149   | -2.5 | -4.5 | 18.5 | 6.8   | C29 H29 N6 O6  |
|          | 557.2135   | -1.1 | -2.0 | 13.5 | 7.2   | C28 H33 N2 O10 |
|          | 557.2135   | -1.1 | -2.0 | 19.0 | 8.0   | C27 H27 N9 O5  |
|          | 557.2122   | 0.2  | 0.4  | 14.0 | 8.6   | C26 H31 N5 O9  |
|          | 557.2108   | 1.6  | 2.9  | 14.5 | 10.2  | C24 H29 N8 O8  |

← M-H<sub>2</sub>O + H<sup>+</sup>

**12b. 13,16-dimethoxy-1,10-bis(4-methoxyphenyl)-4,7-diphenyl-13,16-bis(trifluoromethyl) cyclooctadeca-1,2,3,7,8,9-hexaen-5,11,14,17-tetrayne**

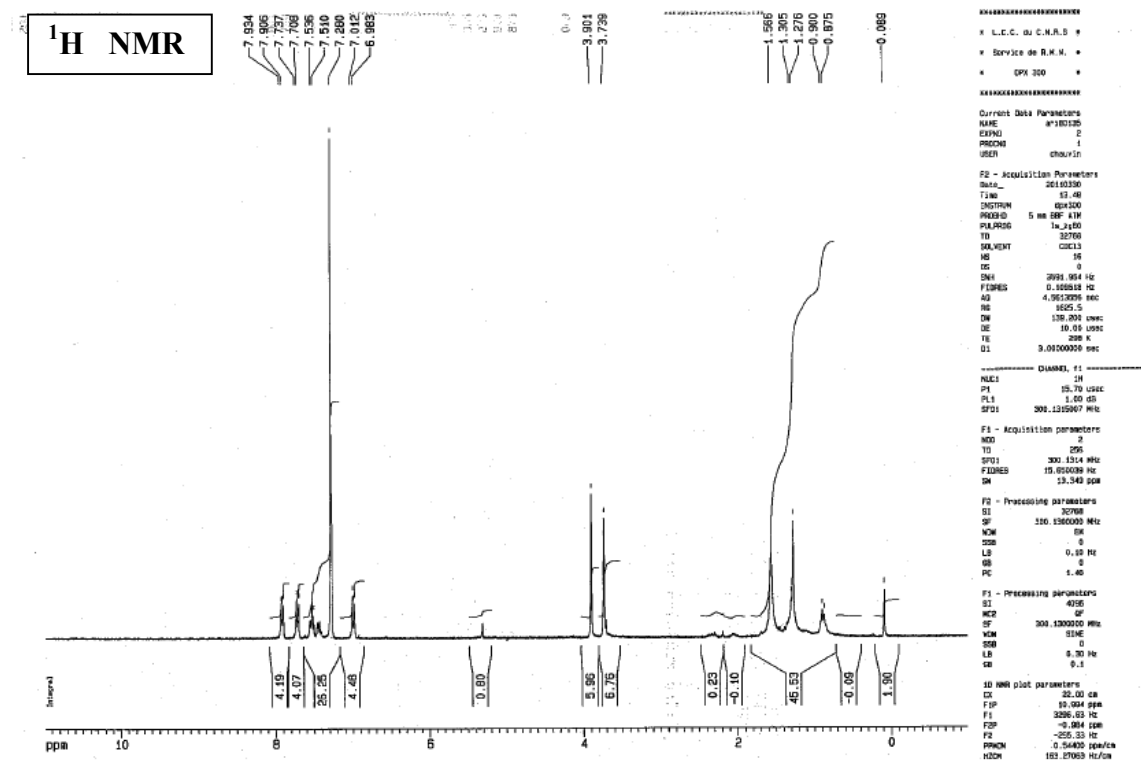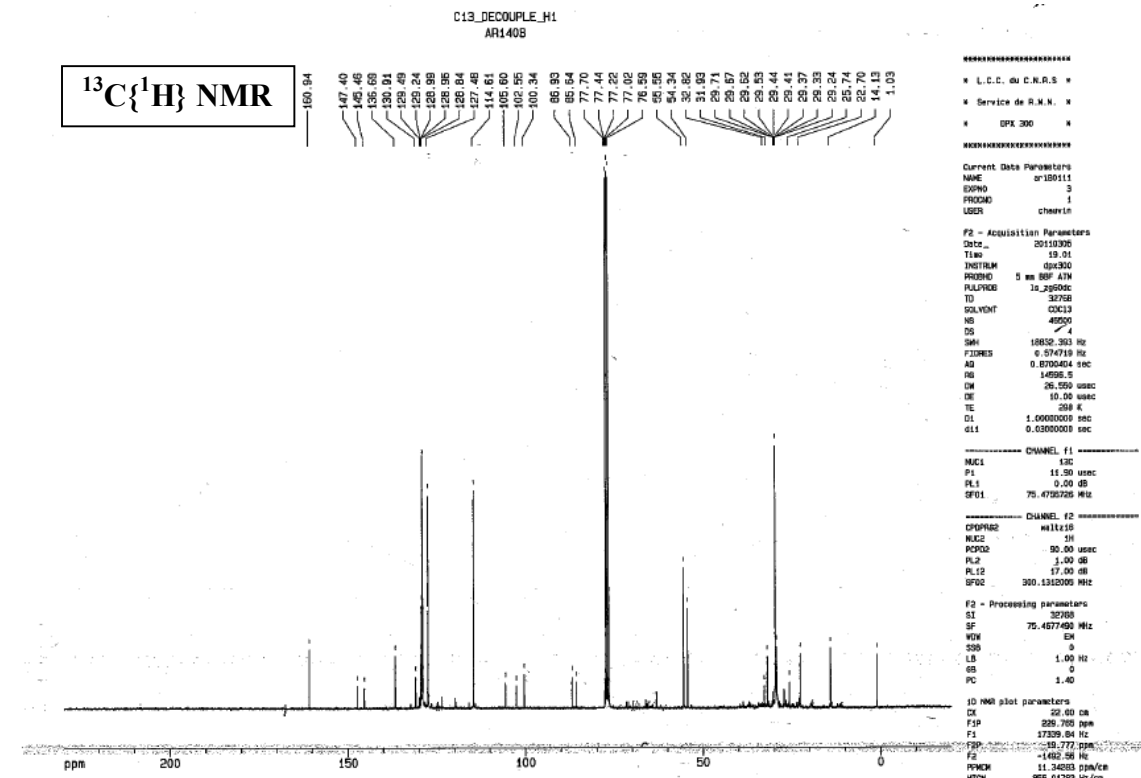

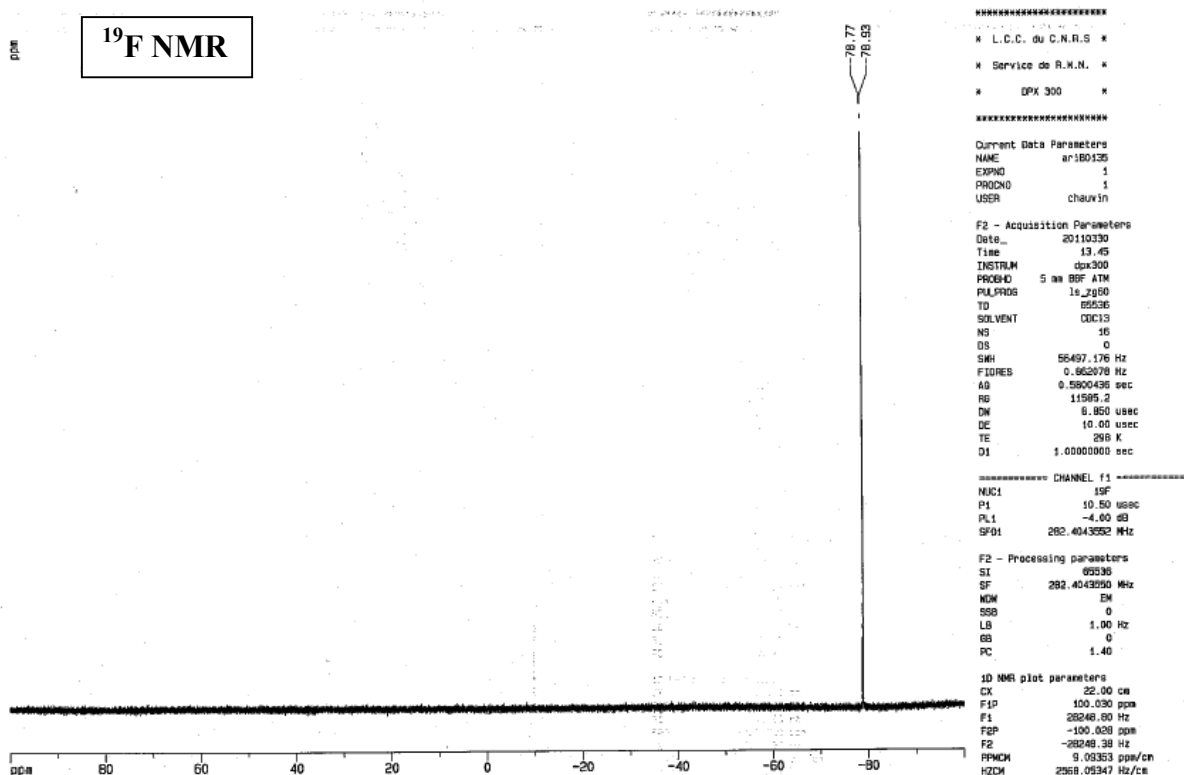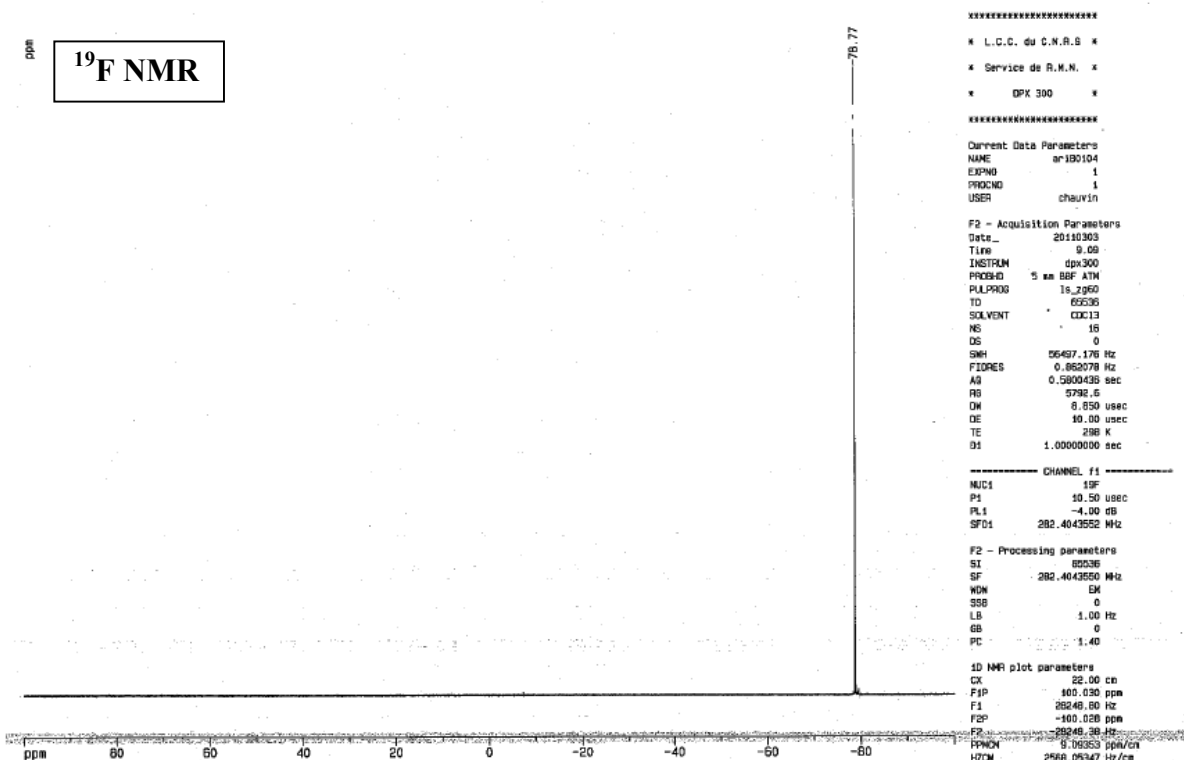

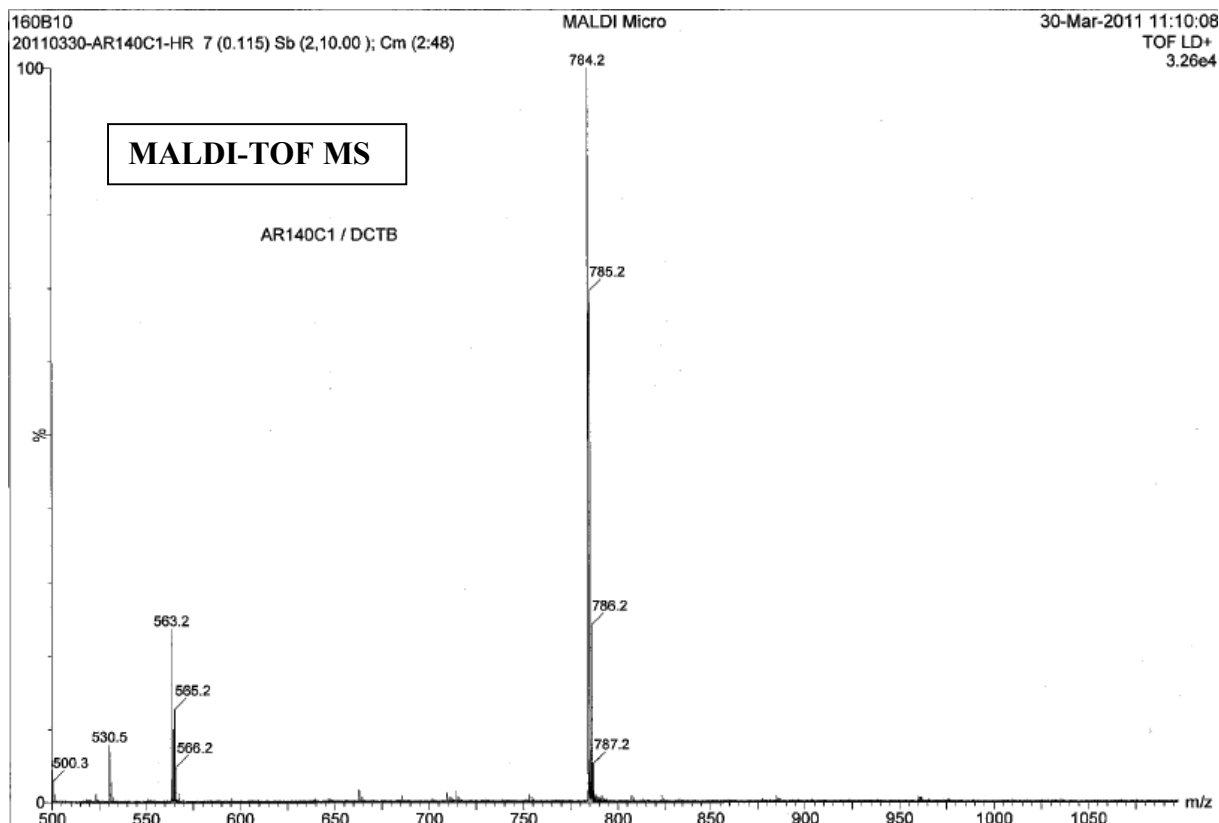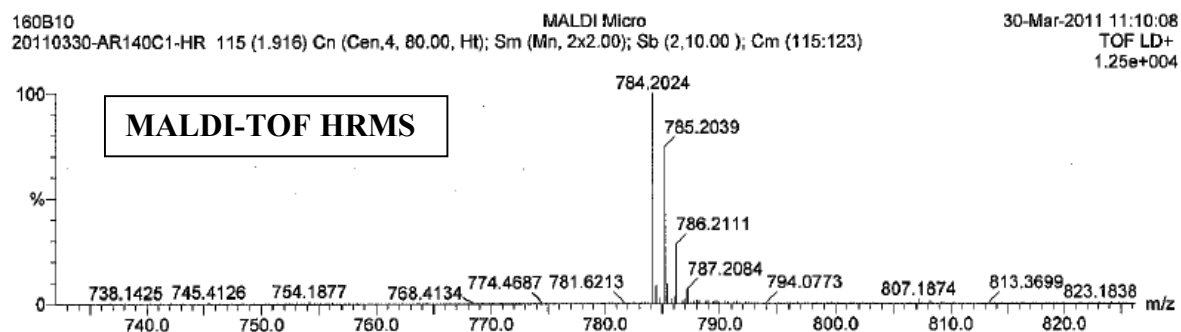

Minimum: -1.5  
Maximum: 30.0 5.0 50.0

| Mass     | Calc. Mass | mDa  | PPM  | DBE  | i-FIT | Formula |     |    |    |
|----------|------------|------|------|------|-------|---------|-----|----|----|
| 784.2024 | 784.2025   | -0.1 | -0.1 | 39.0 | 250.1 | C54     | H28 | O2 | F4 |
|          | 784.2014   | 1.0  | 1.3  | 43.0 | 152.1 | C57     | H27 | O  | F3 |
|          | 784.2037   | -1.3 | -1.7 | 35.0 | 374.9 | C51     | H29 | O3 | F5 |
|          | → 784.2048 | -2.4 | -3.1 | 31.0 | 525.8 | C48     | H30 | O4 | F6 |
|          | 784.2050   | -2.6 | -3.3 | 42.0 | 162.8 | C56     | H29 | O4 | F  |
|          | 784.2060   | -3.6 | -4.6 | 27.0 | 703.6 | C45     | H31 | O5 | F7 |
|          | 784.2061   | -3.7 | -4.7 | 38.0 | 264.7 | C53     | H30 | O5 | F2 |

**12c.** 13,16-dimethoxy-1,4,7,10-tetraphenyl-13,16-bis(trifluoromethyl)cyclooctadeca-1,2,3,7,8,9-hexaen-5,11,14,17-tetrayne

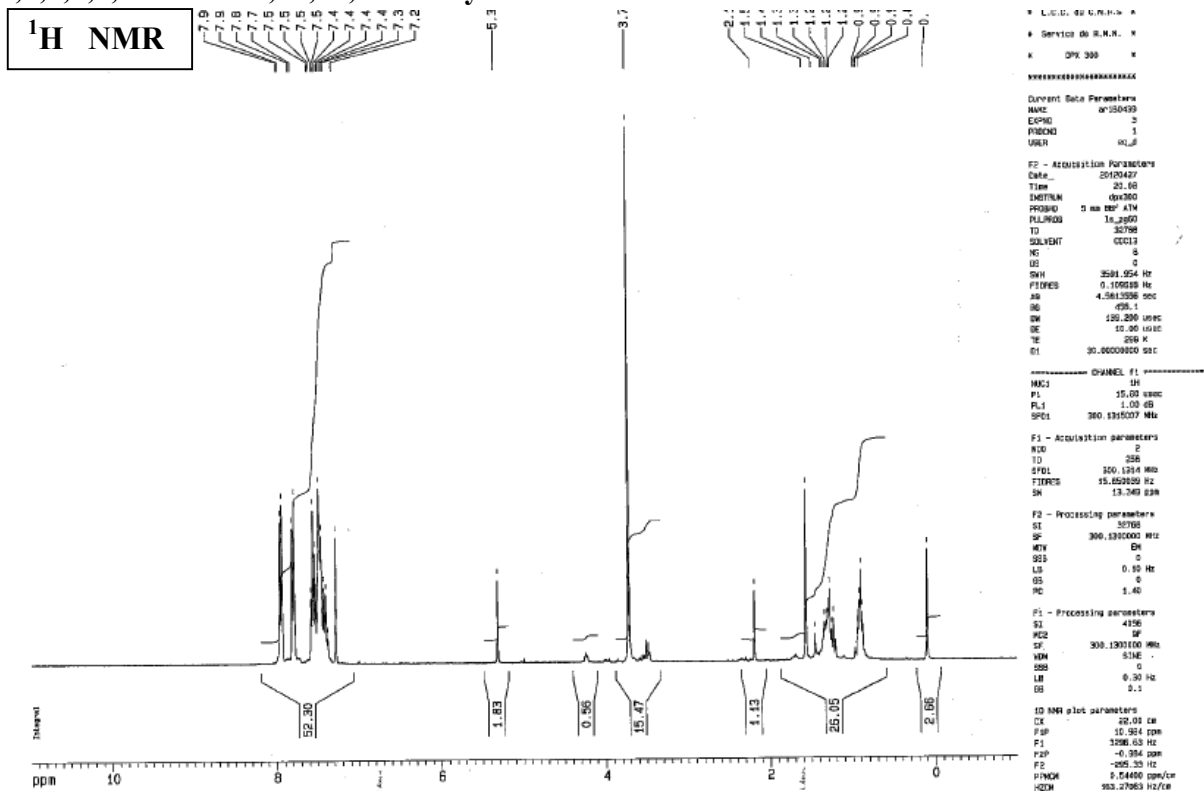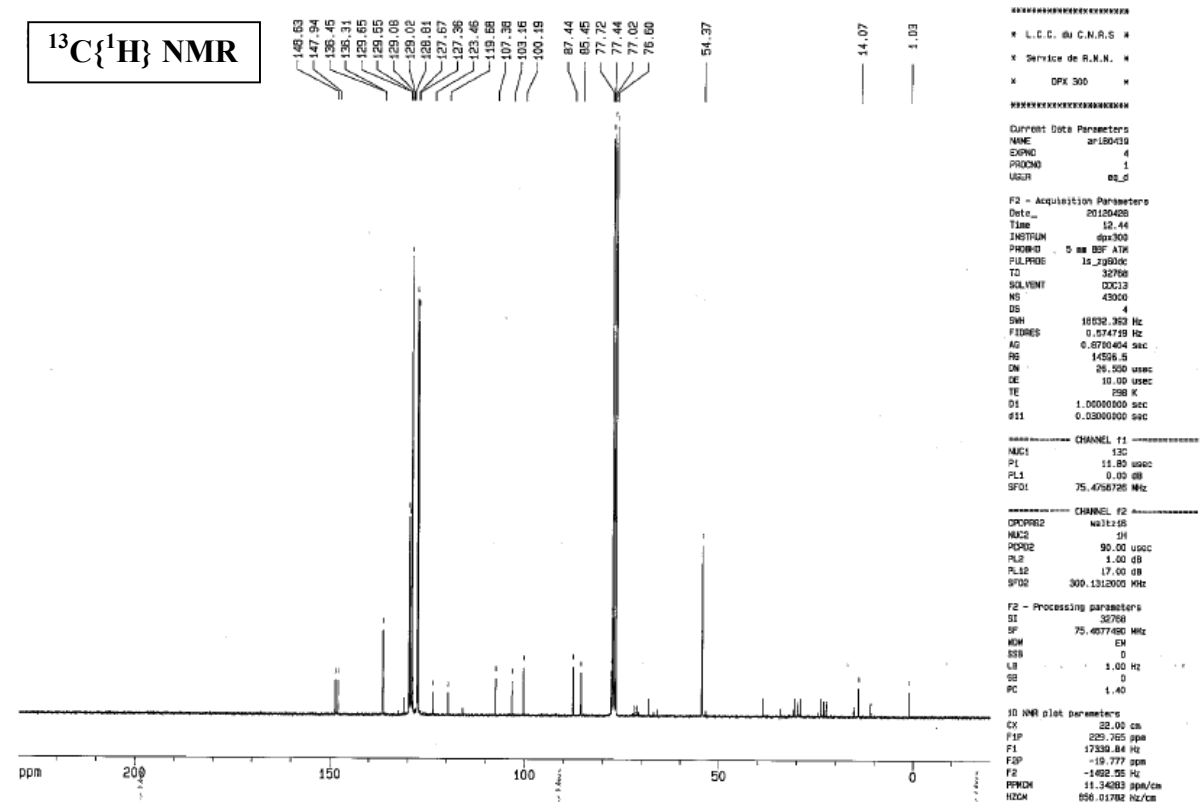

ppm

**<sup>19</sup>F NMR**

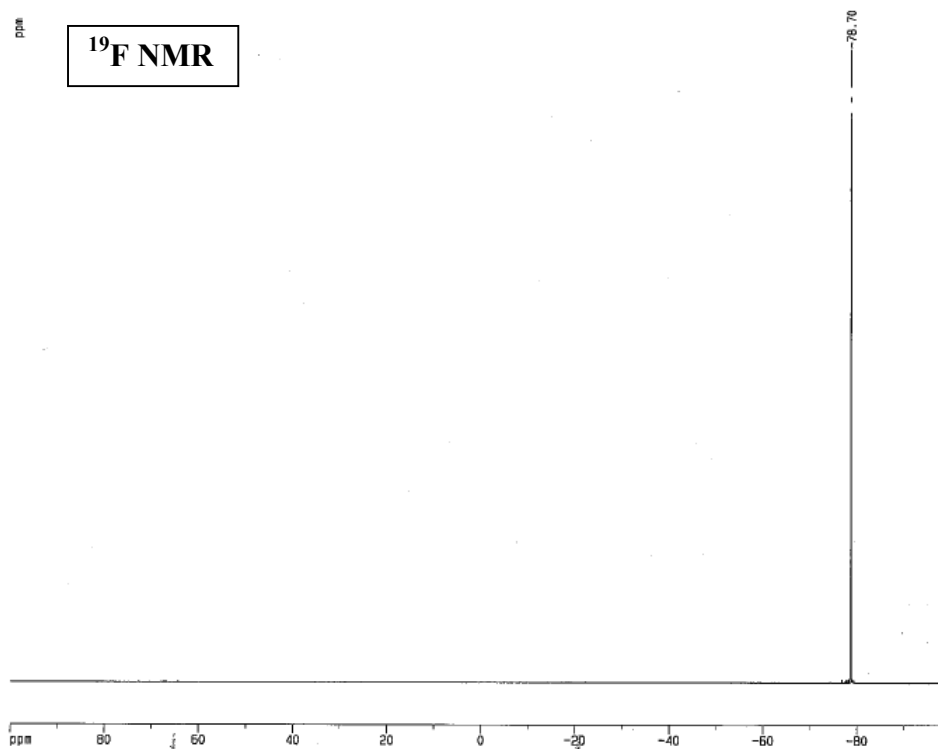

\*\*\*\*\*

\* L.C.C. du C.N.R.S \*

\* Service de R.M.N. \*

\* DPX 300 \*

\*\*\*\*\*

Current Data Parameters

NAME ar180438

EXPNO 2

PROCNO 1

USER eq\_5

F2 - Acquisition Parameters

Date\_ 20120427

Time 20.01

INSTRUM dp300

PROBHD 5 mm BBO ATN

PULPROG zgpg30

TD 65536

SOLVENT CDCl3

NS 16

DS 4

SWH 56497.176 Hz

FIDRES 0.662078 Hz

AQ 0.5800436 sec

RG 2896.3

CH 8.850 usec

DE 10.00 usec

TE 298 K

DI 1.00000000 sec

----- CHANNEL f1 -----

NUC1 <sup>19</sup>F

P1 10.50 usec

PL1 -4.00 dB

SFO1 282.4043002 MHz

F2 - Processing parameters

SI 65536

SF 282.4043550 MHz

WDW EN

SSB 0

LB 1.00 Hz

GB 0

PC 1.40

3D NMR plot parameters

CX 22.00 cm

F1P 100.030 ppm

F1 28248.80 Hz

F2P -100.028 ppm

F2 -28248.38 Hz

PMCH 9.03363 ppm/cm

HZCM 2968.05347 Hz/cm

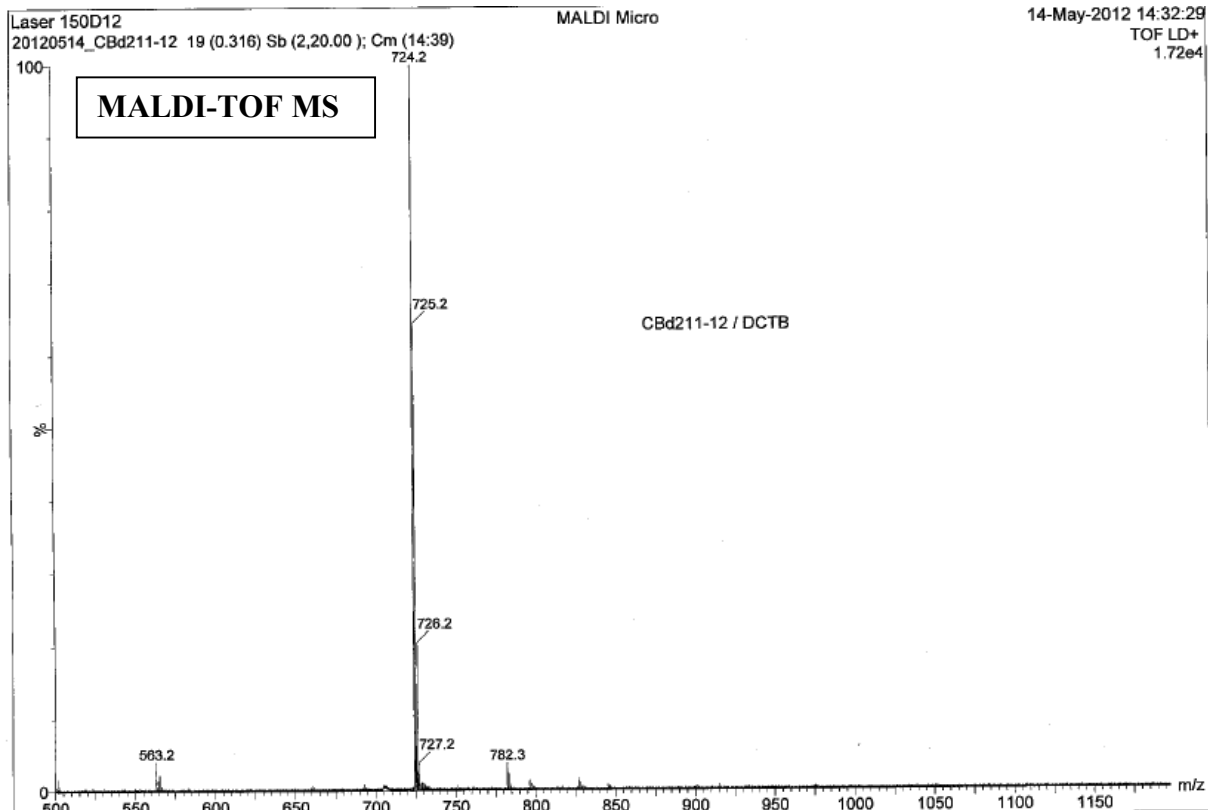



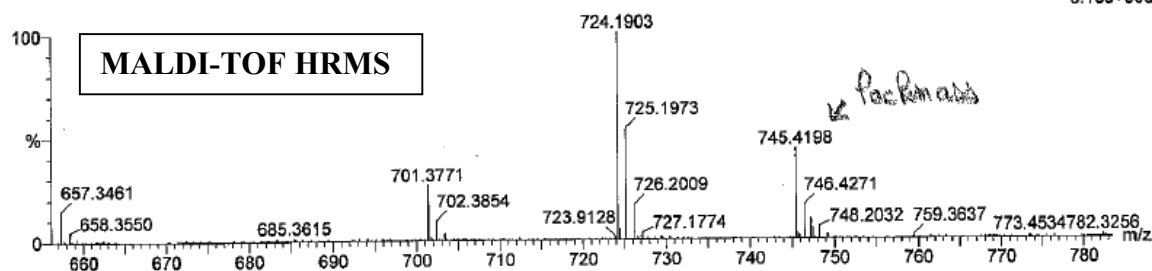

Minimum: -1.5  
Maximum: 5.0 10.0 70.0

| Mass     | Calc. Mass | mDa | PPM | DBE  | i-FIT | Formula       |
|----------|------------|-----|-----|------|-------|---------------|
| 724.1903 | 724.1861   | 4.2 | 5.8 | 34.0 | 6.4   | C48 H27 O4 F3 |
|          | 724.1850   | 5.3 | 7.3 | 38.0 | 8.4   | C51 H26 O3 F2 |
|          | 724.1873   | 3.0 | 4.1 | 30.0 | 17.6  | C45 H28 O5 F4 |
|          | 724.1837   | 6.6 | 9.1 | 31.0 | 20.4  | C46 H26 O2 F6 |
|          | 724.1839   | 6.4 | 8.8 | 42.0 | 22.8  | C54 H25 O2 F  |
|          | 724.1848   | 5.5 | 7.6 | 27.0 | 43.6  | C43 H27 O3 F7 |
|          | 724.1860   | 4.3 | 5.9 | 23.0 | 81.1  | C40 H28 O4 F8 |
|          | 724.1871   | 3.2 | 4.4 | 19.0 | 133.6 | C37 H29 O5 F9 |

**12d.** 13,16-dimethoxy-4,7-diphenyl-13,16-bis(trifluoromethyl)-1,10-bis[4-(trifluoromethyl) phenyl]cyclooctadeca-1,2,3,7,8,9-hexaen-5,11,14,17-tetrayne

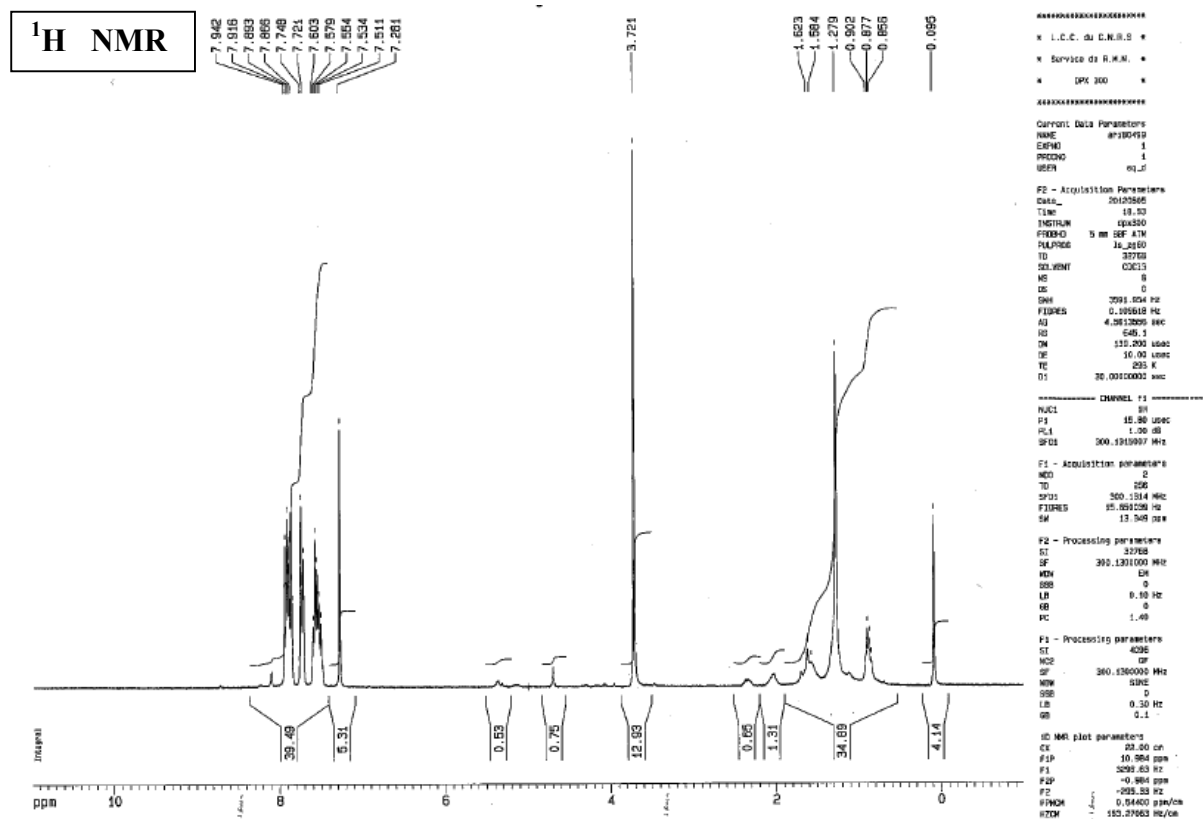

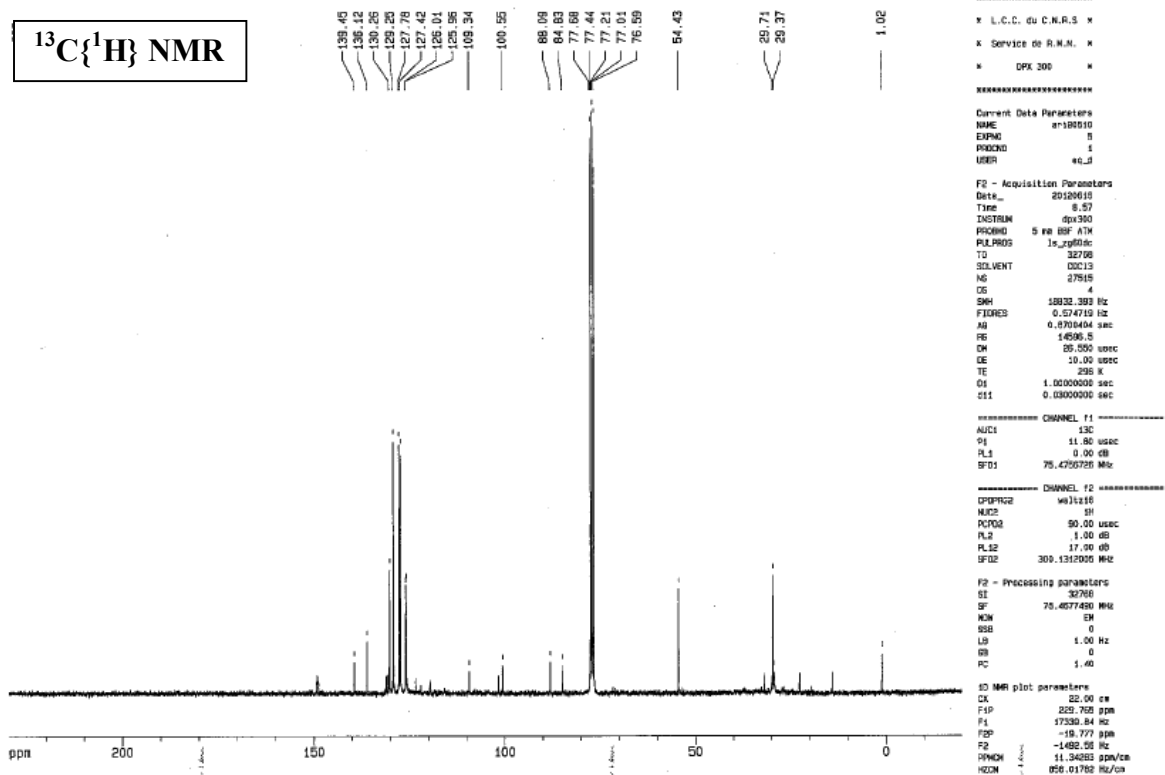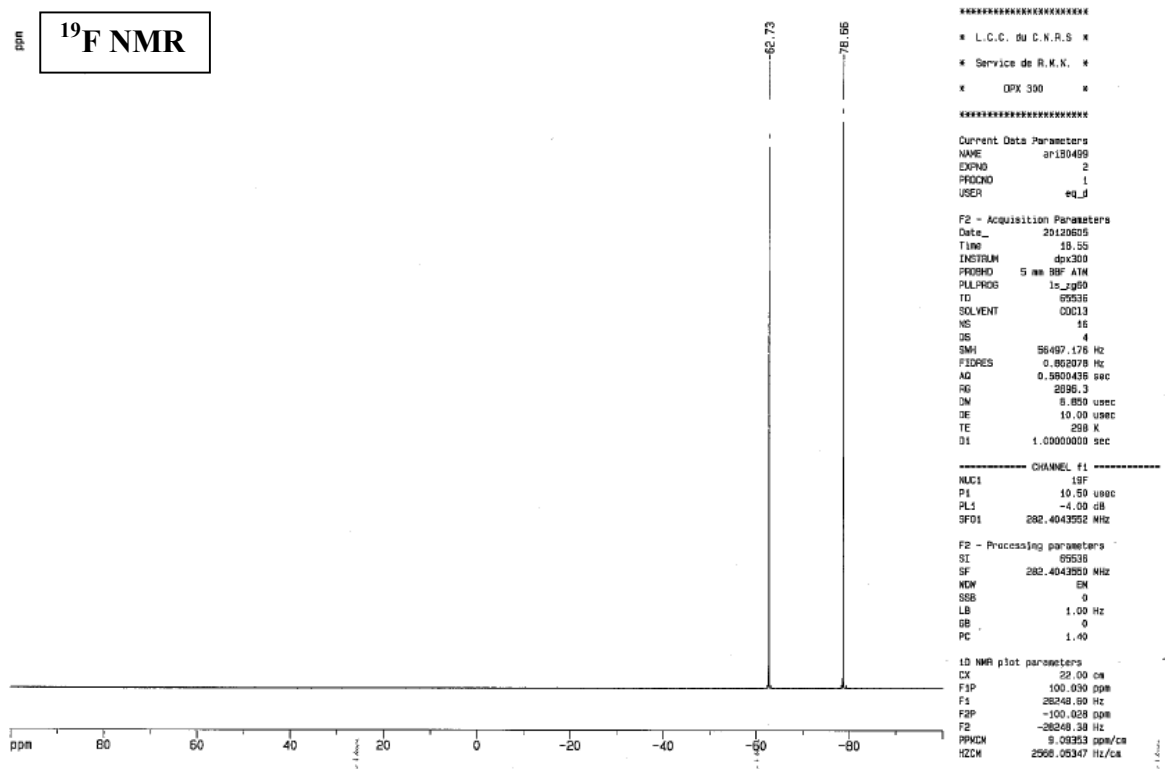

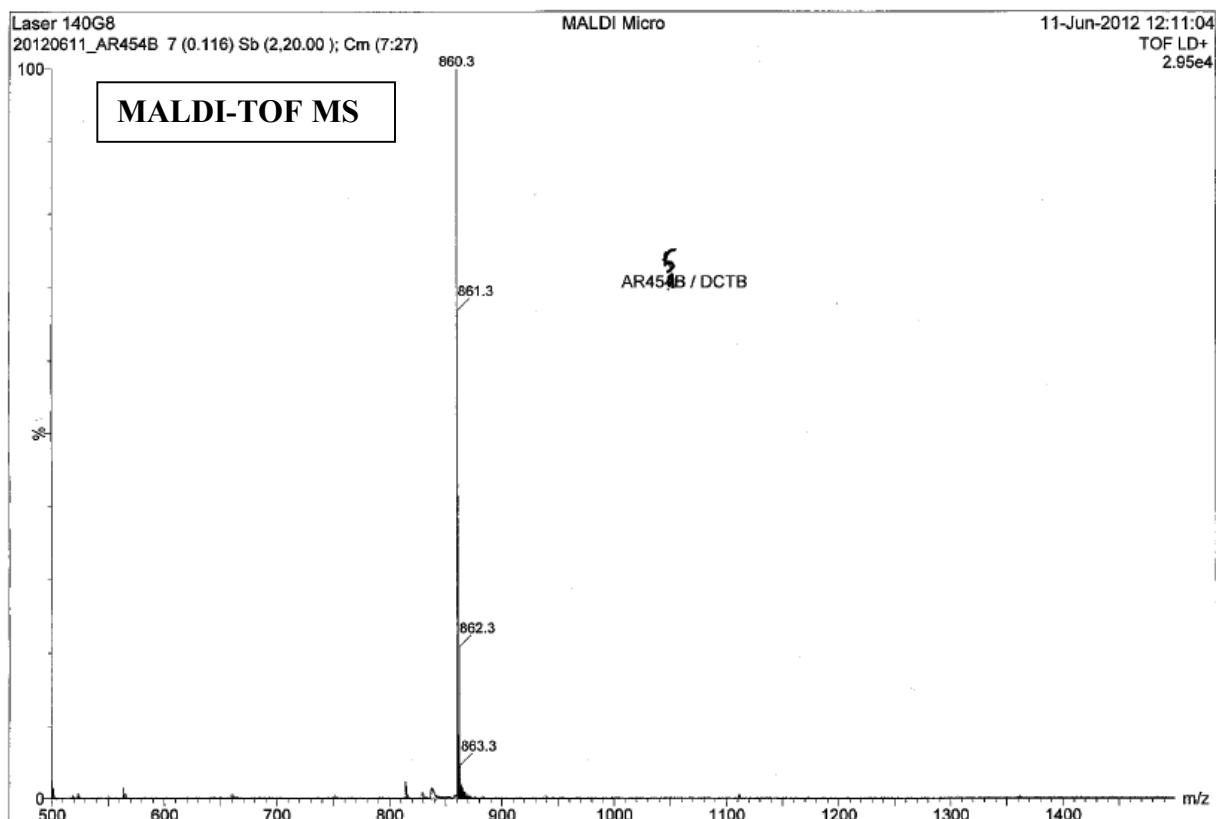

Laser 140G8  
20120611\_AR454B 66 (1.099) Cn (Cen,4, 80.00, Ht); Sb (2,20.00); Cm ((66:67+77+90))

MALDI Micro

11-Jun-2012 12:11:04  
TOF LD+  
1.76e+003

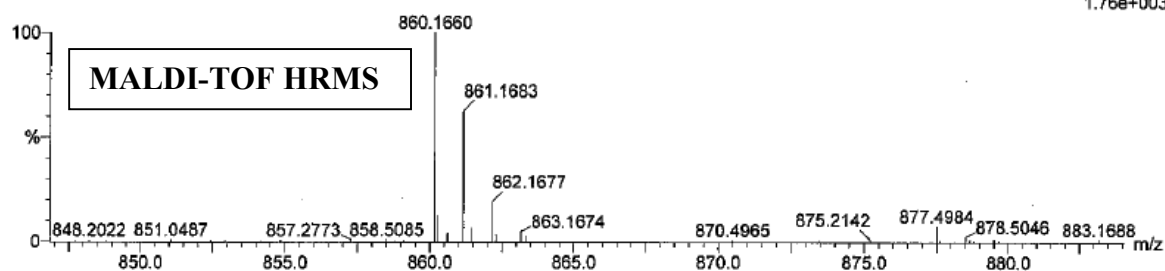

Minimum: -1.5  
Maximum: 90.0

| Mass     | Calc. Mass | mDa | PPM | DBE  | i-FIT | Formula        |
|----------|------------|-----|-----|------|-------|----------------|
| 860.1660 | 860.1586   | 7.4 | 8.6 | 42.0 | 0.7   | C56 H23 O2 F7  |
|          | 860.1598   | 6.2 | 7.2 | 38.0 | 1.4   | C53 H24 O3 F8  |
|          | 860.1575   | 8.5 | 9.9 | 46.0 | 3.7   | C59 H22 O F6   |
|          | 860.1609   | 5.1 | 5.9 | 34.0 | 5.8   | C50 H25 O4 F9  |
|          | 860.1585   | 7.5 | 8.7 | 31.0 | 13.3  | C48 H24 O2 F12 |
|          | 860.1596   | 6.4 | 7.4 | 27.0 | 25.2  | C45 H25 O3 F13 |

**12e.** 9-(4-{10-[4-(9H-carbazol-9-yl)phenyl]-13,16-dimethoxy-4,7-diphenyl-13,16-bis(trifluoromethyl)cyclooctadeca-1,2,3,7,8,9-hexaen-5,11,14,17-tetrayn-1-yl}phenyl)-9H-carbazole

bi-2.109.1  
Night\_H1\_int\_NS\_8 CDCl3 /x/av400pas/data/eq\_d/nmr i.baglai 1

**<sup>1</sup>H NMR**

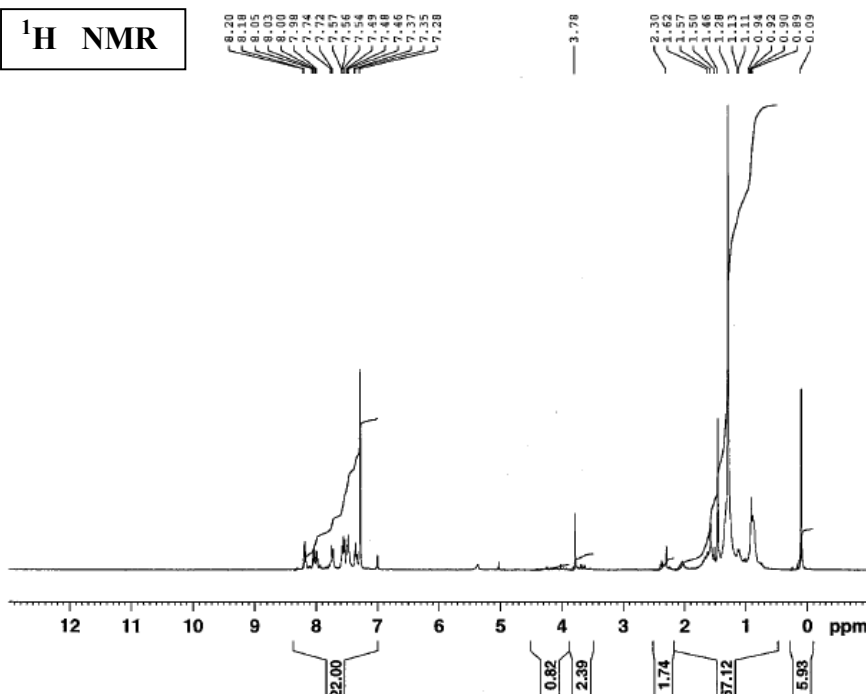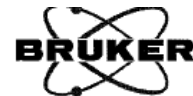

Current Data Parameters  
NAME ibaG0451  
EXPNO 3  
PROCNO 1

F2 - Acquisition Parameters  
Date\_ 20120717  
Time 2.35  
INSTRUM spect  
PROBHD 5 mm PABBO BB-  
PULPROG 1a\_zgpg60  
TD 65536  
SOLVENT CDCl3  
NS 8  
DS 2  
SWH 5597.015 Hz  
FIDRES 0.085404 Hz  
AQ 5.8545995 sec  
RG 114  
DW 89.333 usec  
DE 6.50 usec  
TE 298.0 K  
D1 20.0000000 sec  
TD0 1

===== CHANNEL f1 =====  
NUC1 1H  
P1 13.60 usec  
PLA1 17.0000000 W  
SFO1 400.1624010 MHz

F2 - Processing parameters  
SI 131072  
SF 400.1600000 MHz  
WDW EM  
SSB 0  
LB 0.10 Hz  
GB 0  
PC 1.50

bi-2.109.1  
Night\_C13\_DECOUPLE\_H1\_NS\_5000 CDCl3 /x/av400pas/data/eq\_d/nmr i.baglai 1

**<sup>13</sup>C{<sup>1</sup>H} NMR**

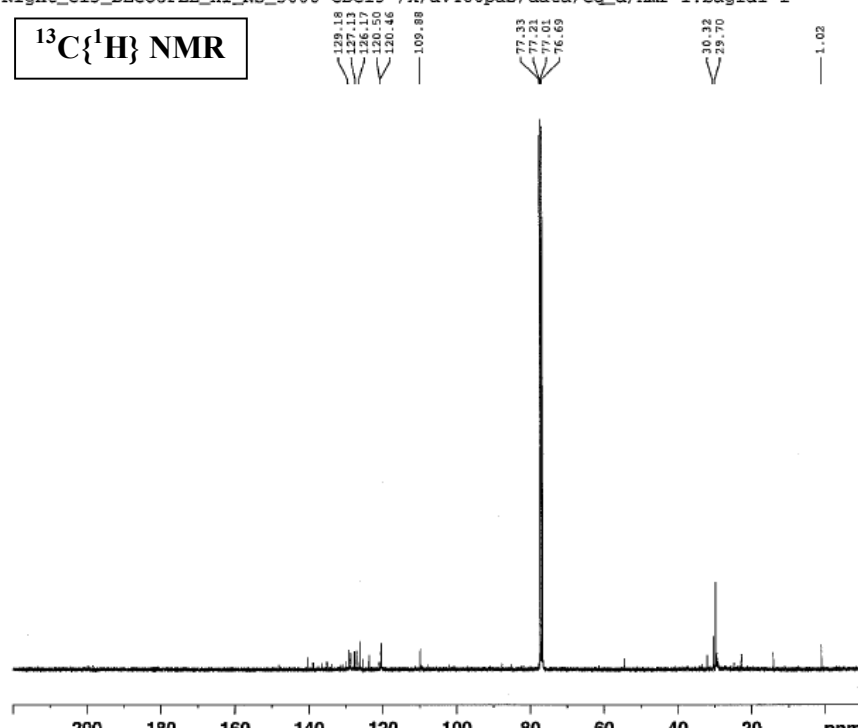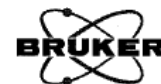

Current Data Parameters  
NAME ibaG0451  
EXPNO 1  
PROCNO 1

F2 - Acquisition Parameters  
Date\_ 20120717  
Time 6.03  
INSTRUM spect  
PROBHD 5 mm PABBO BB-  
PULPROG 1a\_zgpg60  
TD 65536  
SOLVENT CDCl3  
NS 5000  
DS 4  
SWH 23148.148 Hz  
FIDRES 0.353213 Hz  
AQ 1.4156276 sec  
RG 2050  
DW 21.600 usec  
DE 6.50 usec  
TE 298.0 K  
D1 1.0000000 sec  
D11 0.0300000 sec  
TD0 1

===== CHANNEL f1 =====  
NUC1 13C  
P1 9.00 usec  
PLA1 70.0000000 W  
SFO1 100.6308781 MHz

===== CHANNEL f2 =====  
CPDPRG2 waltz16  
NUC2 1H  
PCPD2 90.00 usec  
PLA2 17.0000000 W  
PLA12 0.38819000 W  
SFO2 400.1616006 MHz

F2 - Processing parameters  
SI 131072  
SF 100.6203130 MHz  
WDW EM  
SSB 0  
LB 1.00 Hz  
GB 0  
PC 1.50

bi-2.109.1  
Night\_F19\_NS\_40 CDCl3 /x/av400pas/data/eq\_d/nmr i.baglari 1

# <sup>19</sup>F NMR

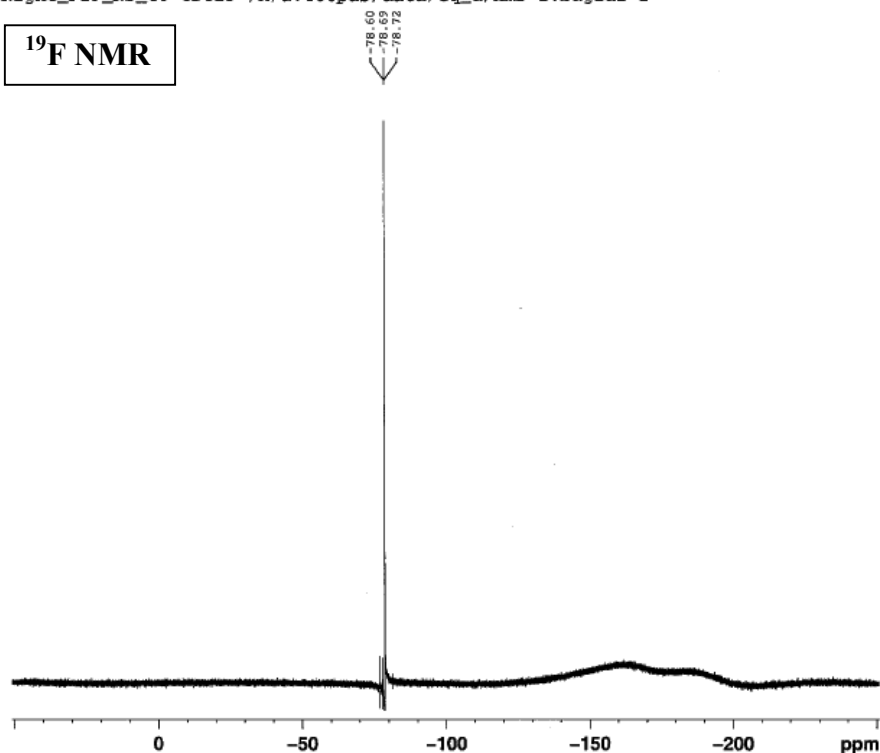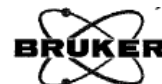

Current Data Parameters  
NAME ibaG0451  
EXPNO 2  
PROCNO 1

F2 - Acquisition Parameters  
Date\_ 20120717  
Time 6.08  
INSTRUM spect  
PROBHD 5 mm PABBO BB-  
PULPROG 1s\_zg60  
TD 131072  
SOLVENT CDCl3  
NS 40  
DS 4  
SWH 113636.367 Hz  
FIDRES 0.866977 Hz  
AQ 0.5767668 sec  
RG 406  
DM 4.400 usec  
DE 6.50 usec  
TE 298.0 K  
DI 1.0000000 sec  
TDO 1

===== CHANNEL f1 =====  
NUC1 19F  
P1 11.65 usec  
PLW1 25.00000000 W  
SFO1 376.4889413 MHz

F2 - Processing parameters  
SI 65536  
SF 376.5265940 MHz  
WDW EM  
SSB 0  
LB 0.30 Hz  
GB 0  
PC 1.00

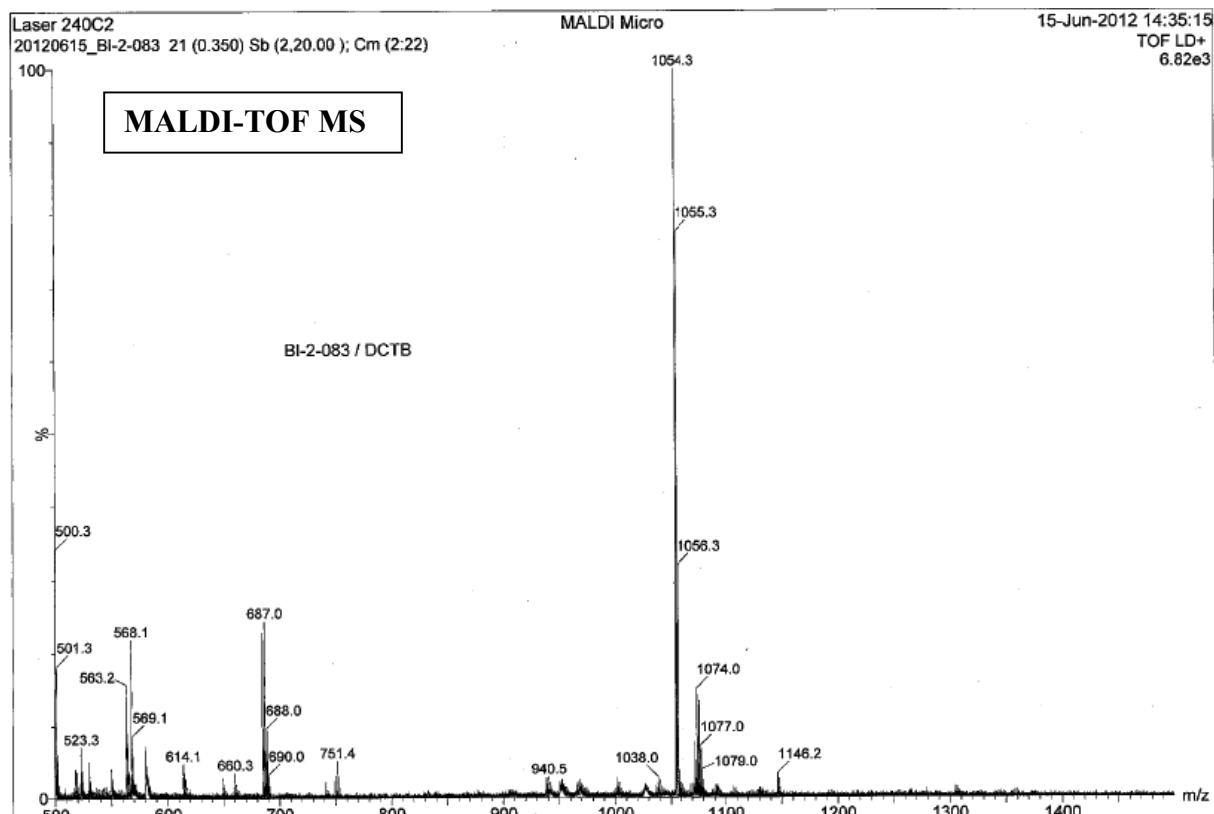

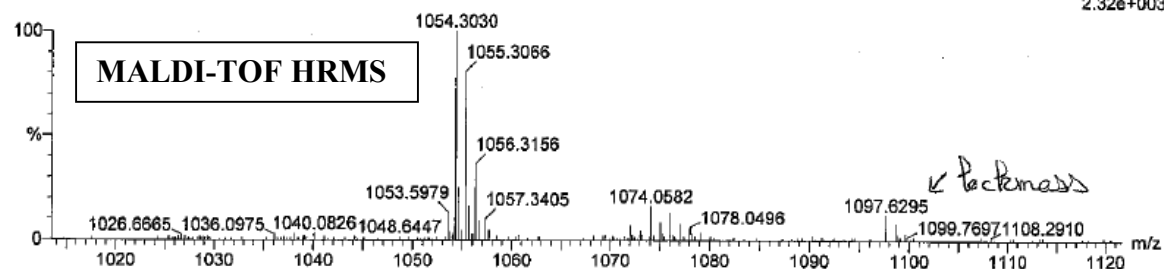

Minimum: -1.5  
Maximum: 5.0 5.0 50.0

| Mass      | Calc. Mass | mDa  | PPM  | DBE  | i-FIT | Formula          |
|-----------|------------|------|------|------|-------|------------------|
| 1054.3030 | 1054.3046  | -1.6 | -1.5 | 49.0 | 4.4   | C72 H41 O F7     |
|           | 1054.3082  | -5.2 | -4.9 | 48.0 | 4.6   | C71 H43 O4 F5    |
|           | 1054.2994  | 3.6  | 3.4  | 49.0 | 6.5   | C70 H40 N2 O2 F6 |
|           | 1054.3032  | -0.2 | -0.2 | 49.5 | 6.8   | C70 H39 N3 F7    |
|           | 1054.3068  | -3.8 | -3.6 | 48.5 | 7.1   | C69 H41 N3 O3 F5 |
|           | 1054.3057  | -2.7 | -2.6 | 45.0 | 10.2  | C69 H42 O2 F8    |
|           | 1054.3005  | 2.5  | 2.4  | 45.0 | 13.8  | C67 H41 N2 O3 F7 |
|           | 1054.3044  | -1.4 | -1.3 | 45.5 | 14.3  | C67 H40 N3 O F8  |
|           | 1054.3080  | -5.0 | -4.7 | 44.5 | 15.2  | C66 H42 N3 O4 F6 |
|           | 1054.3017  | 1.3  | 1.2  | 41.0 | 25.0  | C64 H42 N2 O4 F8 |

**12f.** 1-(4-{10-[4-(1H-indol-1-yl)phenyl]-13,16-dimethoxy-4,7-diphenyl-13,16-bis(trifluoromethyl)cyclooctadeca-1,2,3,7,8,9-hexaen-5,11,14,17-tetrayn-1-yl}phenyl)-1H-indole

bi-2.118.1  
Day\_H1\_int\_NS\_8 CDC13 /x/av400pas/data/eq\_d/nmr i.baglai 32

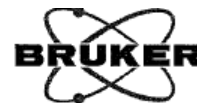

<sup>1</sup>H NMR

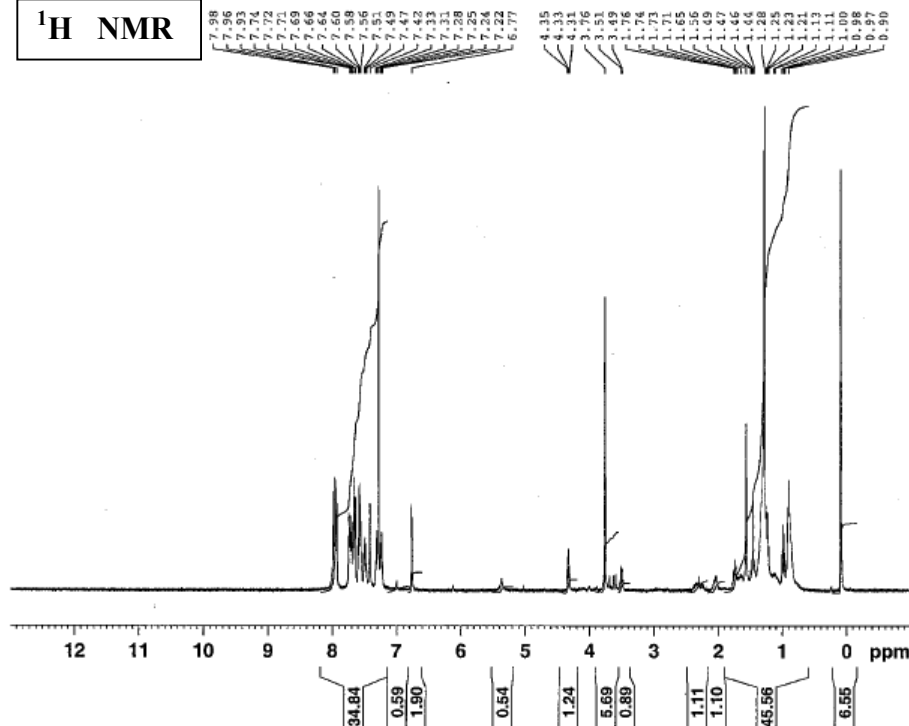

Current Data Parameters  
NAME ibag0480  
EXPNO 2  
PROCNO 1

F2 - Acquisition Parameters  
Date\_ 20120726  
Time 13.33  
INSTRUM spect  
PROBHD 5 mm PABBO BB-  
PULPROG ls\_zg60  
TD 65536  
SOLVENT CDCl3  
NS 8  
DS 2  
SWH 5597.015 Hz  
FIDRES 0.085404 Hz  
AQ 5.8545995 sec  
RG 128  
DW 89.333 usec  
DE 6.50 usec  
TE 298.0 K  
D1 20.0000000 sec  
TD0 1

===== CHANNEL f1 =====  
NUC1 1H  
P1 13.60 usec  
PLW1 17.0000000 W  
SFO1 400.1624010 MHz

F2 - Processing parameters  
SI 131072  
SF 400.1600000 MHz  
WDW EM  
SSB 0  
LB 0.10 Hz  
GB 0  
PC 1.50

bi-2.118.1  
Night\_C13\_DECOUPLE\_H1\_NS\_5000 CDC13 /x/av400pas/data/eq\_d/nmr i.baglai 32

# <sup>13</sup>C{<sup>1</sup>H} NMR

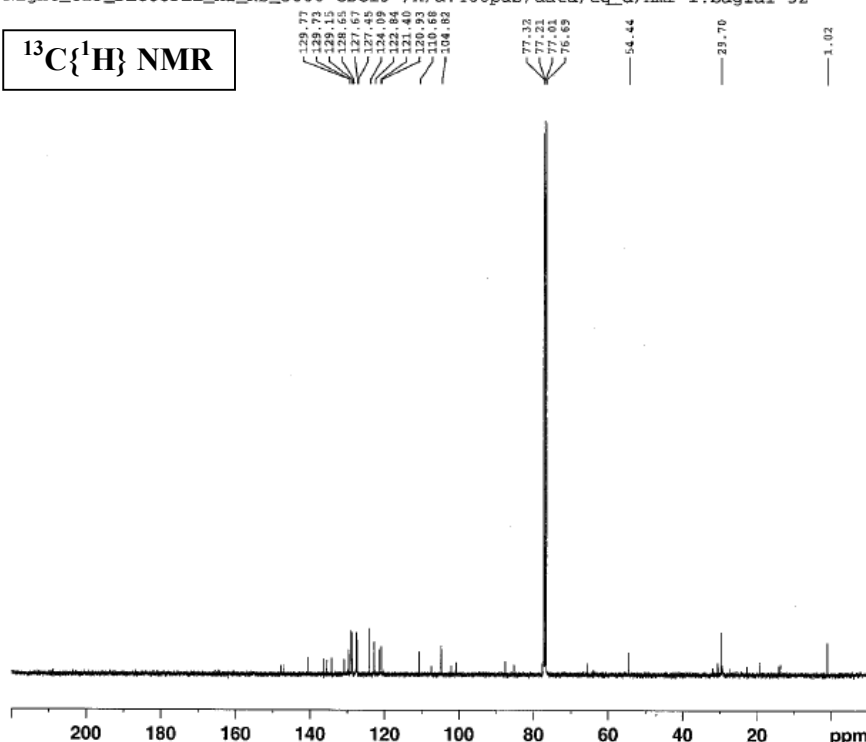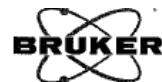

Current Data Parameters  
NAME ibag0480  
EXPNO 3  
PROCNO 1

F2 - Acquisition Parameters  
Date\_ 20120727  
Time 2.02  
INSTRUM spect  
PROBHD 5 mm PABBO BB-  
PULPROG ls\_zgdc60  
TD 65536  
SOLVENT CDC13  
NS 5000  
DS 4  
SWH 23148.148 Hz  
FIDRES 0.353213 Hz  
AQ 1.4156276 sec  
RG 2050  
DW 21.600 usec  
DE 6.50 usec  
TE 298.0 K  
D1 1.00000000 sec  
D11 0.03000000 sec  
TD0 1

===== CHANNEL f1 =====  
NUC1 13C  
P1 9.00 usec  
PLW1 70.00000000 W  
SFO1 100.6308781 MHz

===== CHANNEL f2 =====  
CPDPRG2 waltz16  
NUC2 1H  
PCPD2 90.00 usec  
PLW2 17.00000000 W  
PLW12 0.38819000 W  
SFO2 400.1616006 MHz

F2 - Processing parameters  
SI 131072  
SF 100.6203130 MHz  
WDW EM  
SSB 0  
LB 1.00 Hz  
GB 0  
PC 1.50

bi-2.118.1  
Day\_F19\_NS\_40 CDC13 /x/av400pas/data/eq\_d/nmr i.baglai 32

# <sup>19</sup>F NMR

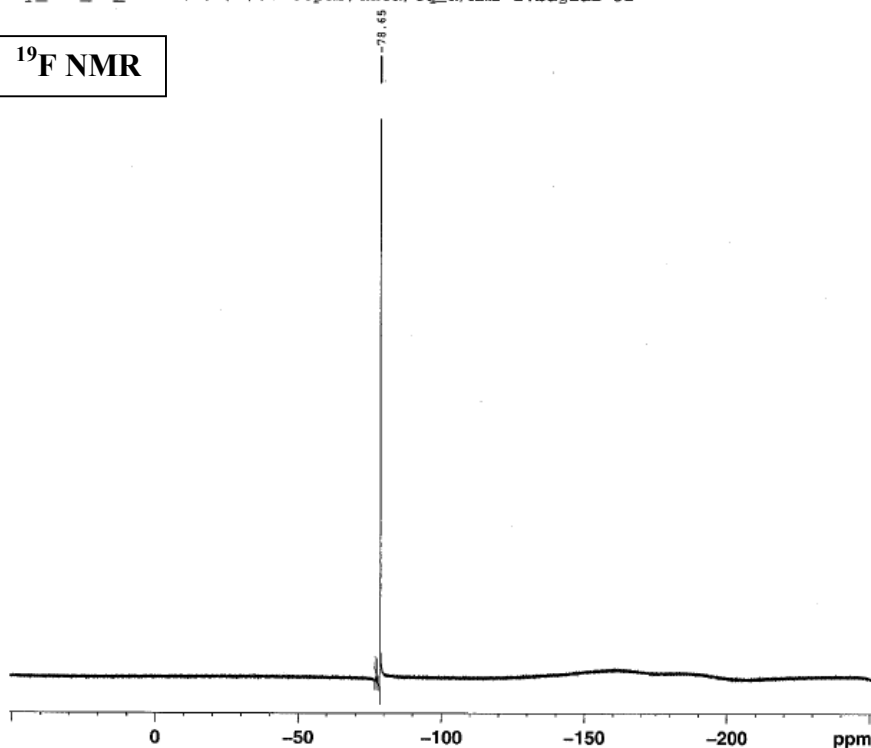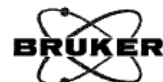

Current Data Parameters  
NAME ibag0480  
EXPNO 1  
PROCNO 1

F2 - Acquisition Parameters  
Date\_ 20120726  
Time 13.26  
INSTRUM spect  
PROBHD 5 mm PABBO BB-  
PULPROG ls\_zg60  
TD 131072  
SOLVENT CDC13  
NS 40  
DS 4  
SWH 113636.367 Hz  
FIDRES 0.866977 Hz  
AQ 0.5767658 sec  
RG 645  
DW 4.400 usec  
DE 6.50 usec  
TE 298.0 K  
D1 1.00000000 sec  
TD0 1

===== CHANNEL f1 =====  
NUC1 19F  
P1 11.65 usec  
PLW1 25.00000000 W  
SFO1 376.4889413 MHz

F2 - Processing parameters  
SI 65536  
SF 376.5265340 MHz  
WDW EM  
SSB 0  
LB 0.30 Hz  
GB 0  
PC 1.00

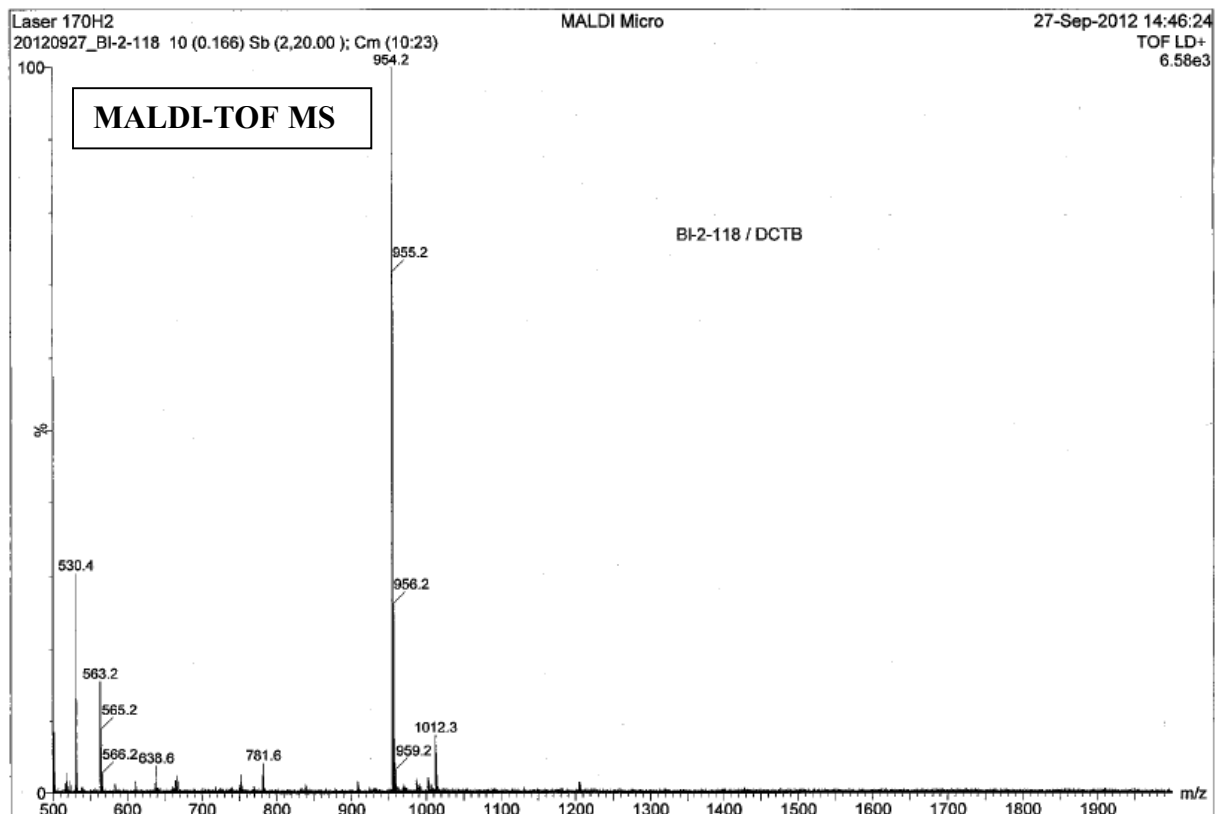

Laser 170H2  
20120927\_BI-2-118 30 (0.500) Cn (Cen,4, 80.00, Ht); Sb (2,20.00); Cm (24:32)

MALDI Micro

27-Sep-2012 14:46:24  
TOF LD+  
1.46e+003

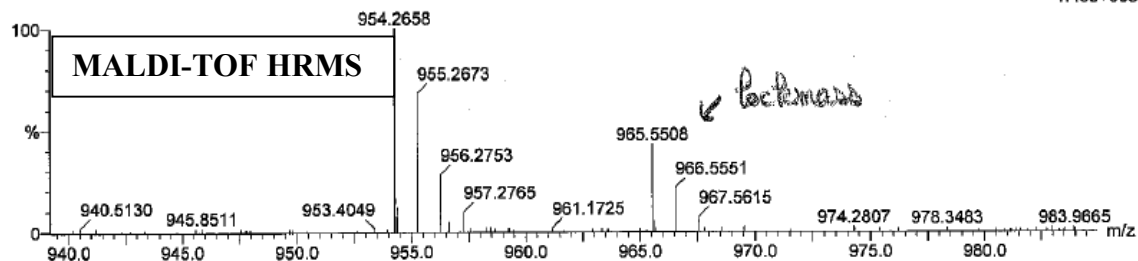

Minimum: -1.5  
Maximum: 5.0 5.0 55.0

| Mass     | Calc. Mass | mDa  | PPM  | DBE  | i-FIT | Formula          |
|----------|------------|------|------|------|-------|------------------|
| 954.2658 | 954.2631   | 2.7  | 2.8  | 46.5 | 2.5   | C65 H36 N O3 F4  |
|          | 954.2670   | -1.2 | -1.3 | 47.0 | 2.9   | C65 H35 N2 O F5  |
|          | 954.2681   | -2.3 | -2.4 | 43.0 | 3.5   | C62 H36 N2 O2 F6 |
|          | 954.2620   | 3.8  | 4.0  | 50.5 | 4.4   | C68 H35 N O2 F3  |
|          | 954.2658   | 0.0  | 0.0  | 51.0 | 4.6   | C68 H34 N2 F4    |
|          | 954.2618   | 4.0  | 4.2  | 39.5 | 6.1   | C60 H36 N O2 F8  |
|          | 954.2692   | -3.4 | -3.6 | 39.0 | 6.6   | C59 H37 N2 O3 F7 |



**12g.** {2-[13,16-dimethoxy-4,7-diphenyl-13,16-bis(trifluoromethyl)-10-{2-[tris(propan-2-yl)silyl]ethynyl}cyclooctadeca-1,2,3,7,8,9-hexaen-5,11,14,17-tetrayn-1-yl]ethynyl} tris(propan-2-yl)silane

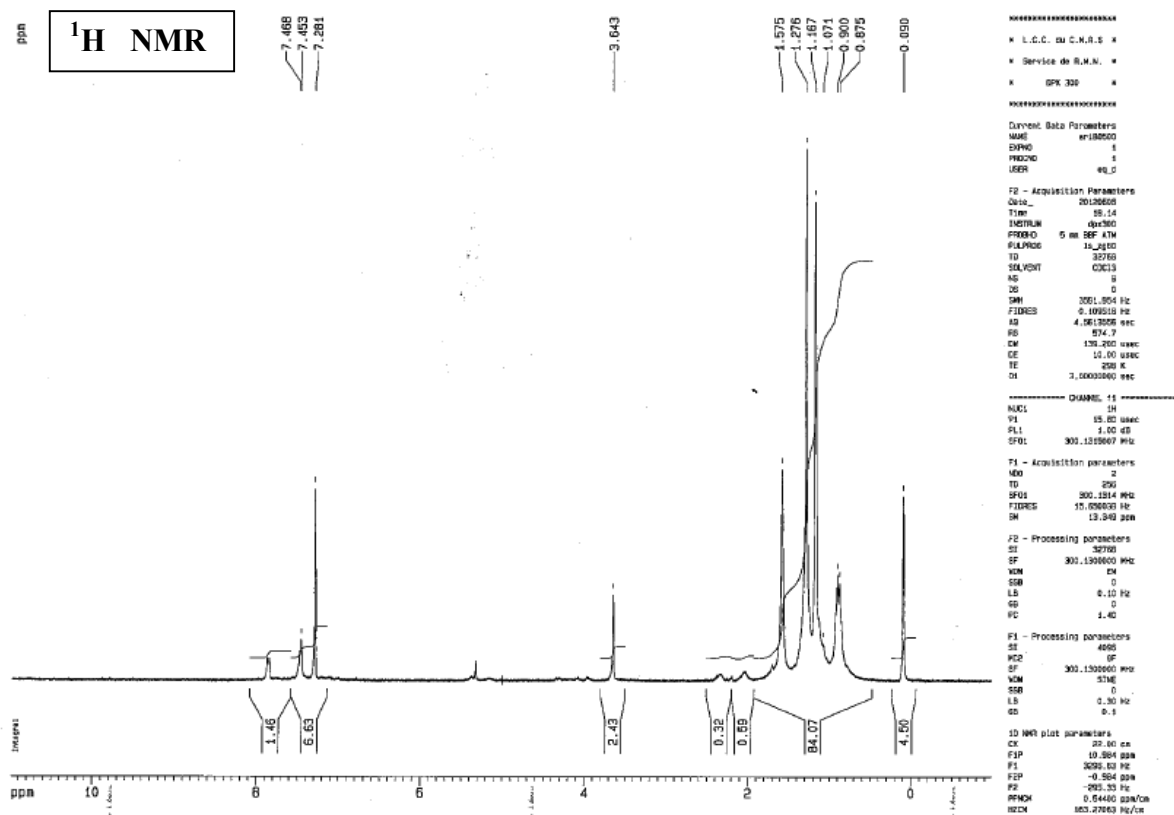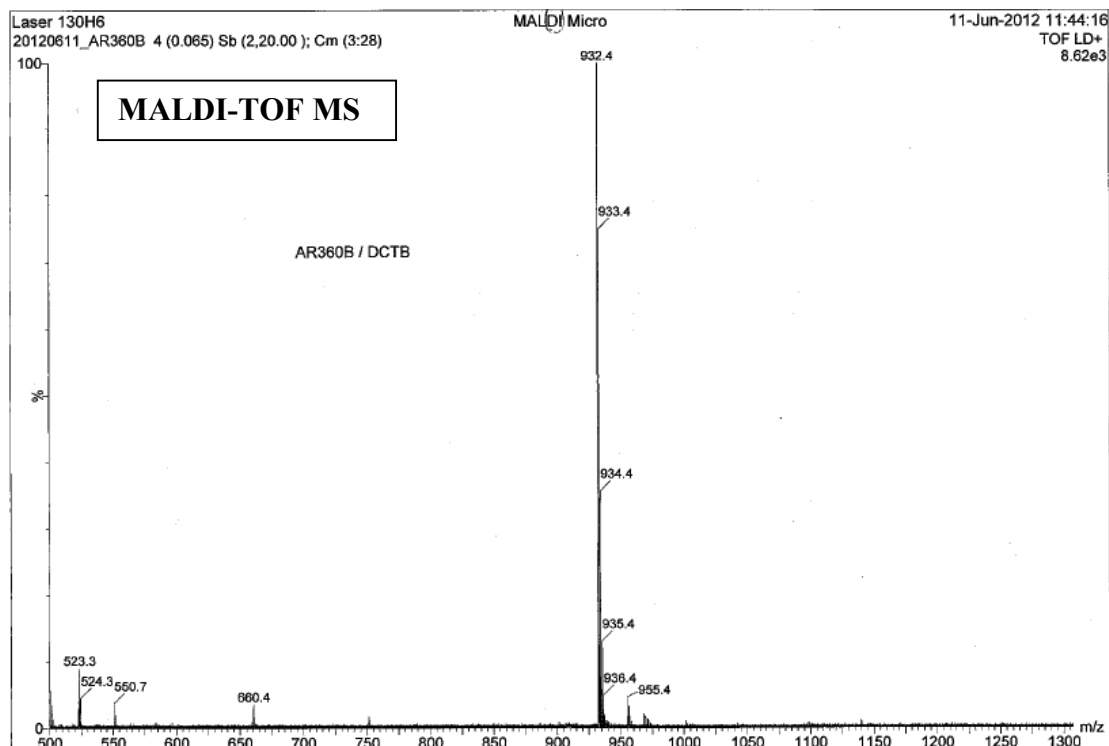

Laser 130H6 MALDI Micro  
20120611\_AR360B 50 (0.832) Cn (Cen,4, 80.00, Ht); Sb (2,20.00); Cm ((48:51+74:77))

11-Jun-2012 11:44:16  
TOF LD+  
3.48e+003

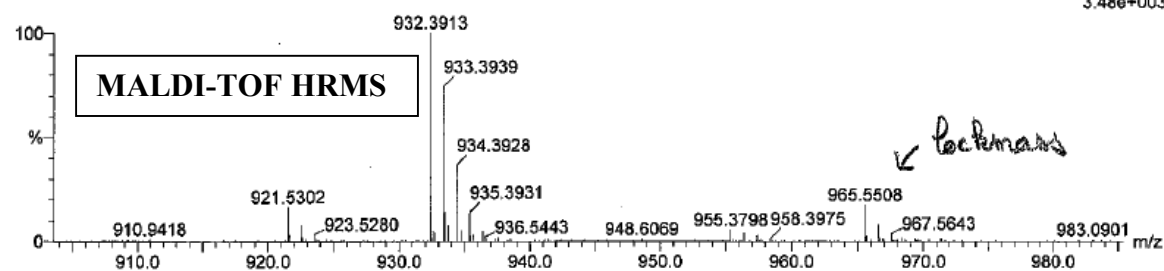

Minimum: -1.5  
Maximum: 5.0 5.0 90.0

| Mass     | Calc. Mass | mDa | PPM | DBE  | i-FIT | Formula           |
|----------|------------|-----|-----|------|-------|-------------------|
| 932.3913 | 932.3904   | 0.9 | 1.0 | 30.0 | 0.8   | C58 H59 O4 F3 Si2 |
|          | 932.3868   | 4.5 | 4.8 | 31.0 | 1.7   | C59 H57 O F5 Si2  |
|          | 932.3880   | 3.3 | 3.5 | 27.0 | 3.4   | C56 H58 O2 F6 Si2 |
|          | 932.3891   | 2.2 | 2.4 | 23.0 | 10.1  | C53 H59 O3 F7 Si2 |
|          | 932.3873   | 4.0 | 4.3 | 35.0 | 10.4  | C62 H55 O3 F3 Si  |
|          | 932.3884   | 2.9 | 3.1 | 31.0 | 19.1  | C59 H56 O4 F4 Si  |
|          | 932.3902   | 1.1 | 1.2 | 19.0 | 22.3  | C50 H60 O4 F8 Si2 |
|          | 932.3871   | 4.2 | 4.5 | 24.0 | 51.9  | C54 H56 O3 F8 Si  |

**12h. 13,16-dimethoxy-4,7-diphenyl-1,10-bis(2-phenylethynyl)-13,16-bis(trifluoromethyl) cyclooctadeca-1,2,3,7,8,9-hexaen-5,11,14,17-tetrayne**

vm728.1  
Day\_H1\_int\_NS\_8 CDCl3 /x/av400pas/data/eq\_d/nmr v.maraval 55

**<sup>1</sup>H NMR**

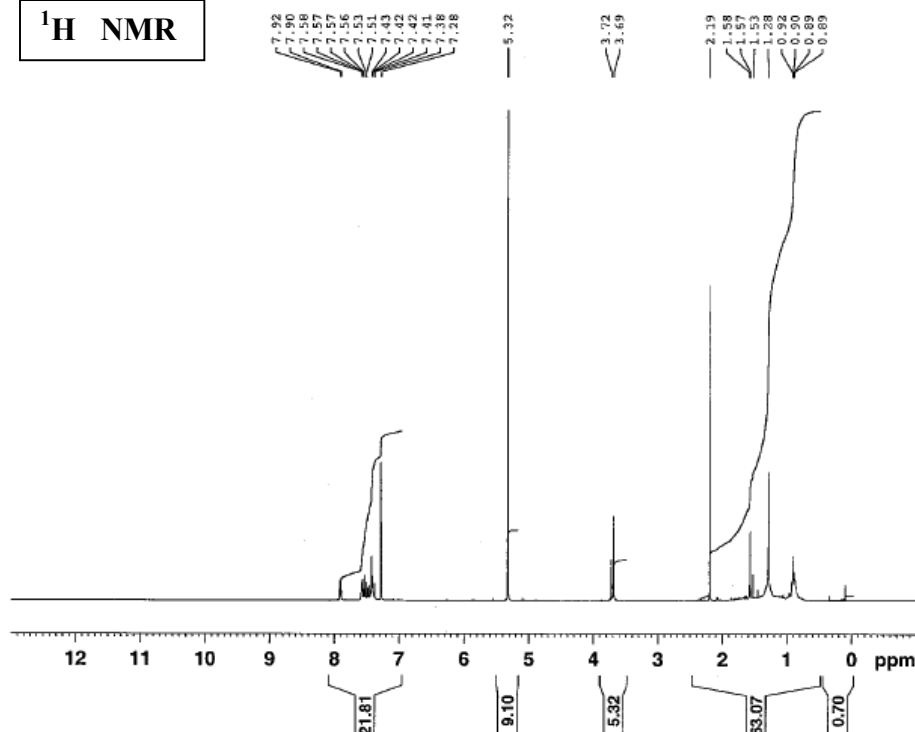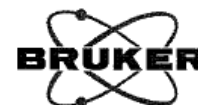

Current Data Parameters  
NAME valG0424  
EXPNO 1  
PROCNO 1

F2 - Acquisition Parameters  
Date\_ 20120928  
Time 15.40  
INSTRUM spect  
PROBHD 5 mm PABBO BB-  
PULPROG 1s\_zg60  
TD 65536  
SOLVENT CDCl3  
NS 8  
DS 2  
SWH 5597.015 Hz  
FIDRES 0.085404 Hz  
AQ 5.8545995 sec  
RG 101  
DW 89.333 usec  
DE 6.50 usec  
TE 298.0 K  
D1 20.00000000 sec  
TD0 1

===== CHANNEL f1 =====  
NUC1 1H  
P1 13.50 usec  
PLWL 17.00000000 W  
SPOL 400.1624010 MHz

F2 - Processing parameters  
SI 131072  
SF 400.1600000 MHz  
WDW EM  
SSB 0  
LB 0.10 Hz  
GB 0  
PC 1.50

valD0038.2.fid  
C13\_DECOUPLE\_H1  
vm728.1

# $^{13}\text{C}\{^1\text{H}\}$ NMR

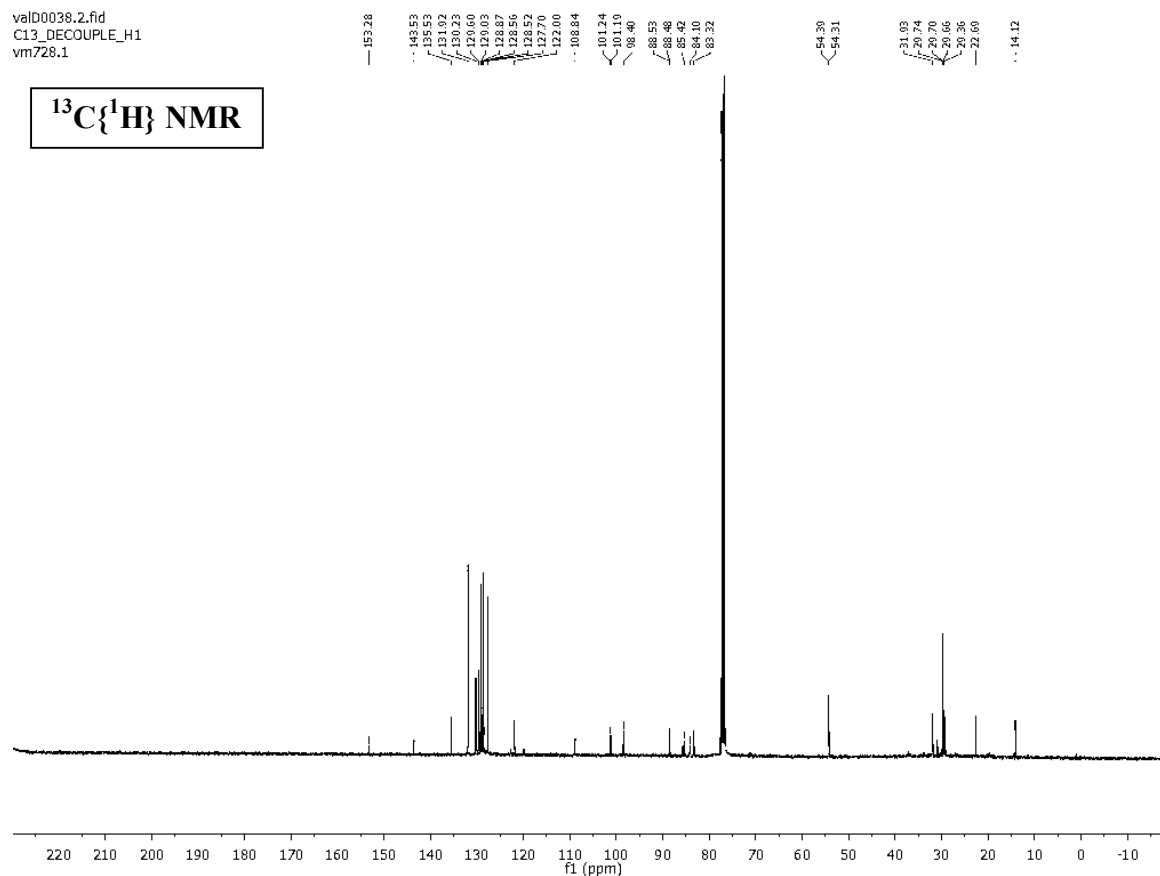

# $^{19}\text{F}$ NMR

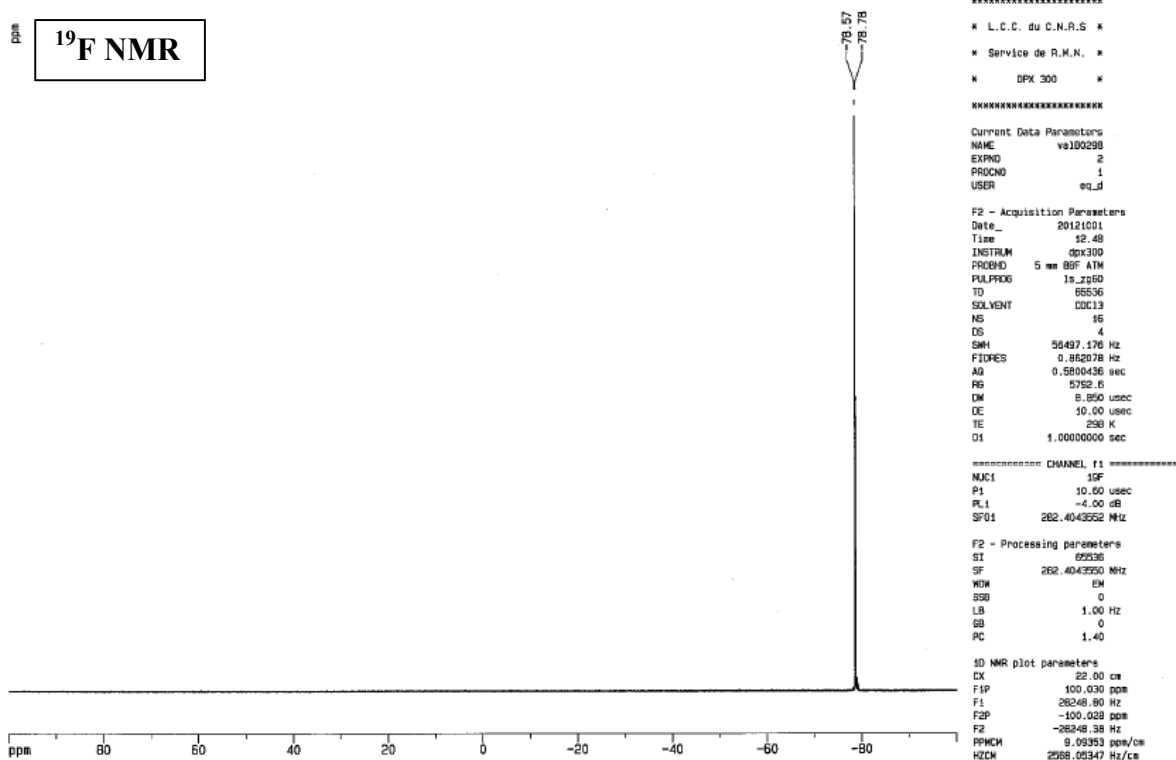

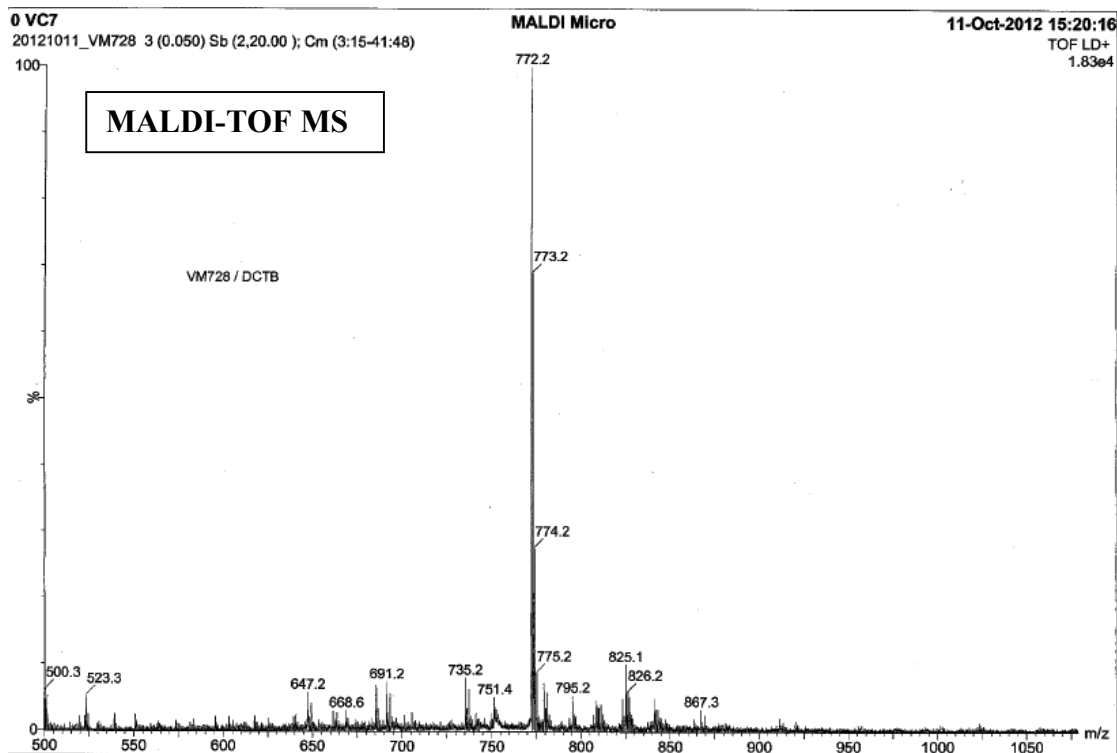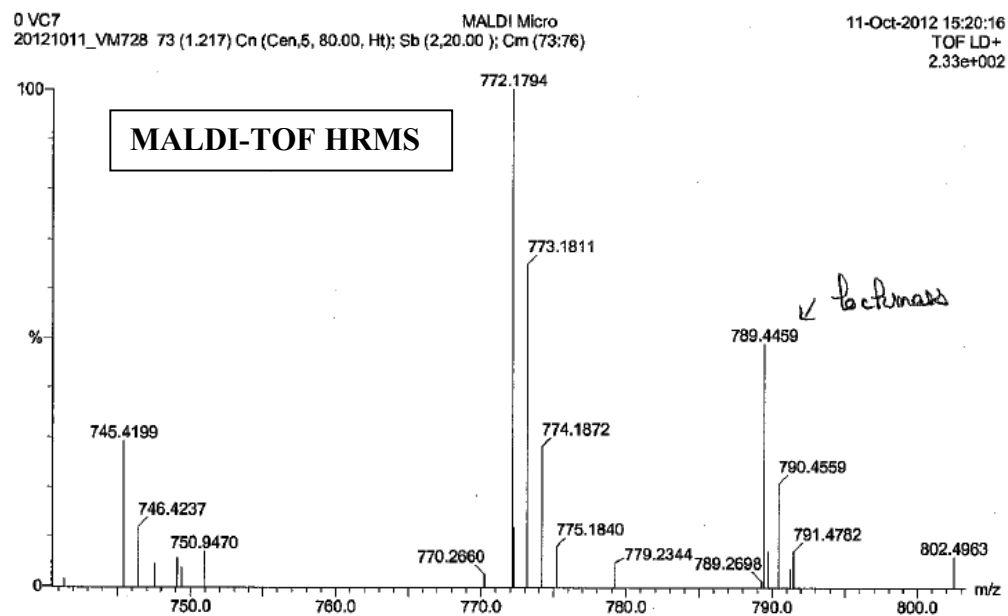

Minimum: -1.5  
Maximum: 3.0 10.0 60.0

| Mass     | Calc. Mass | mDa  | PPM  | DBE  | i-FIT | i-FIT (Norm) | Formula         |
|----------|------------|------|------|------|-------|--------------|-----------------|
| 772.1794 | 772.1814   | -2.0 | -2.6 | 43.0 | 15.8  | 0.5          | C56 H24 F4      |
|          | 772.1826   | -3.2 | -4.1 | 39.0 | 16.7  | 1.5          | C53 H25 O F5    |
|          | 772.1837   | -4.3 | -5.6 | 35.0 | 17.8  | 2.6          | C50 H26 O2 F6 ← |
|          | 772.1861   | -6.7 | -8.7 | 38.0 | 18.3  | 3.0          | C52 H27 O4 F3   |
|          | 772.1848   | -5.4 | -7.0 | 31.0 | 19.0  | 3.7          | C47 H27 O3 F7   |
|          | 772.1860   | -6.6 | -8.5 | 27.0 | 20.1  | 4.8          | C44 H28 O4 F8   |

## 6. Voltammograms

### **12b.** 13,16-dimethoxy-1,10-bis(4-methoxyphenyl)-4,7-diphenyl-13,16-bis(trifluoromethyl) cyclooctadeca-1,2,3,7,8,9-hexaen-5,11,14,17-tetrayne

SW voltammograms for reduction and oxidation of **12b** in CH<sub>2</sub>Cl<sub>2</sub> (containing 0.1 mol.L<sup>-1</sup> (nBu<sub>4</sub>N)PF<sub>6</sub>) on Pt microdisk (r = 0.25 mm).

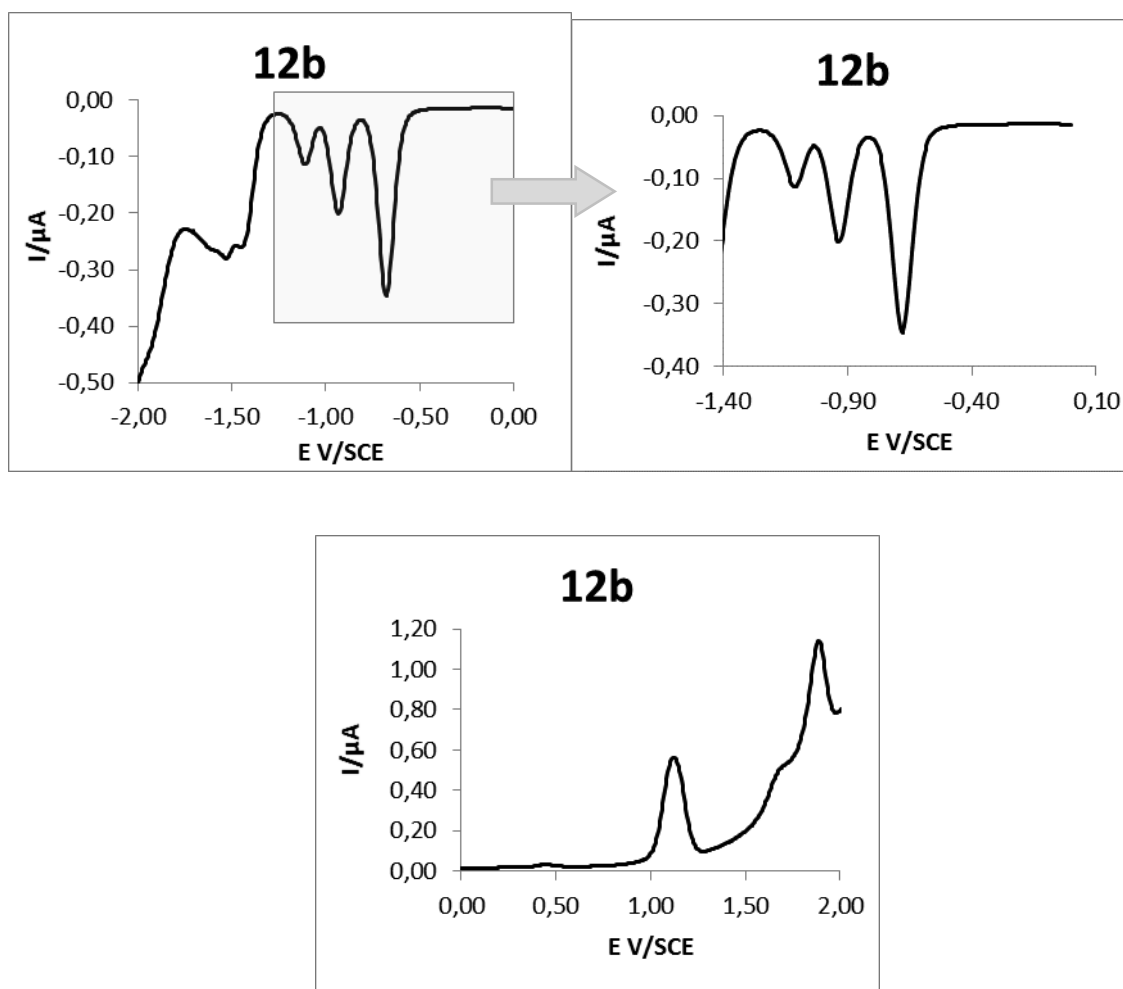

Cyclic voltammograms for reduction and oxidation of **12b** in CH<sub>2</sub>Cl<sub>2</sub> (containing 0.1 mol.L<sup>-1</sup> (nBu<sub>4</sub>N)PF<sub>6</sub>) on Pt microdisk (r = 0.25 mm), scan rate is 0.1 V/s.

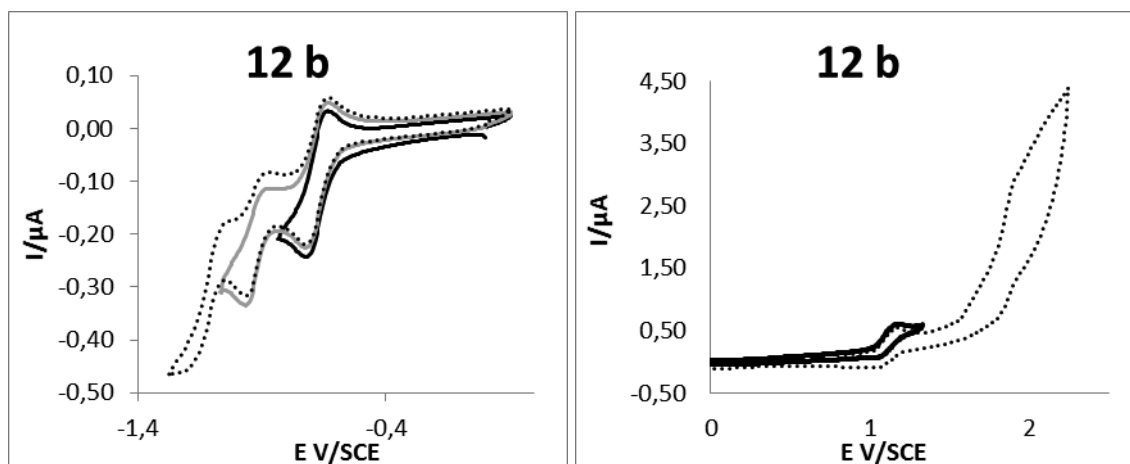

Influence of the scan rate: Cyclic voltammograms for first reduction and first oxidation of **12b** in CH<sub>2</sub>Cl<sub>2</sub> (containing 0.1 mol.L<sup>-1</sup> (nBu<sub>4</sub>N)PF<sub>6</sub>) on Pt microdisk (r = 0.25 mm), scan rate is 0.1 V/s (solid line) and 0.5 V/s (dotted line).

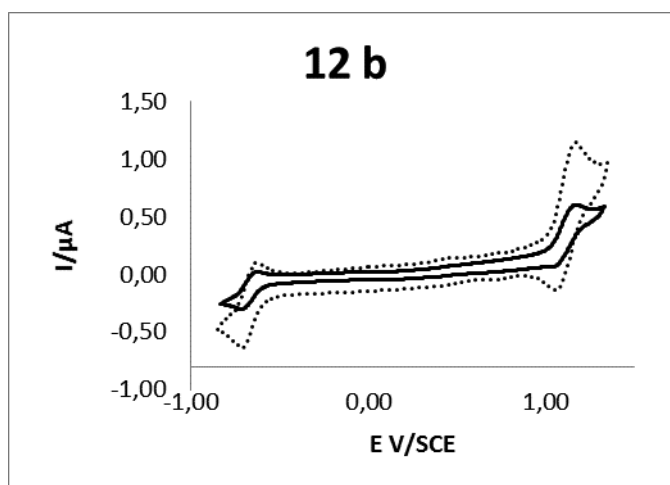

**12c.** 13,16-dimethoxy-1,4,7,10-tetraphenyl-13,16-bis(trifluoromethyl)cyclooctadeca-1,2,3,7,8,9-hexaen-5,11,14,17-tetrayne

SW voltammograms for reduction and oxidation of **12c** in CH<sub>2</sub>Cl<sub>2</sub> (containing 0.1 mol.L<sup>-1</sup> (nBu<sub>4</sub>N)PF<sub>6</sub>) on Pt microdisk (r = 0.25 mm).

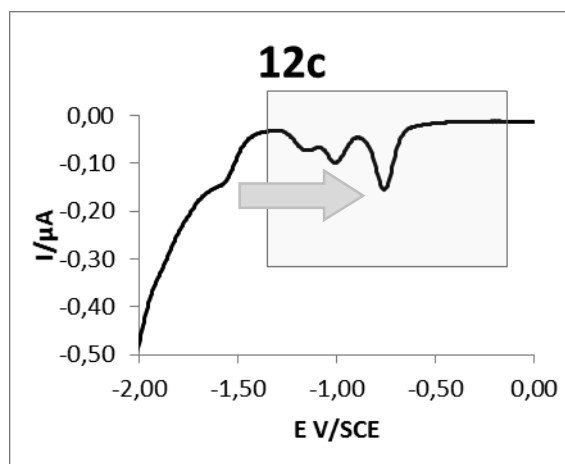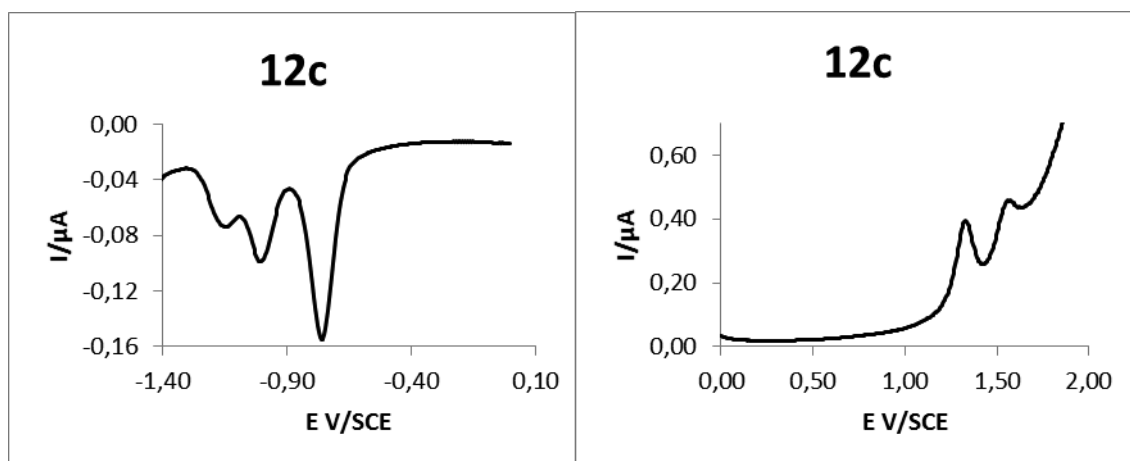

Cyclic voltammograms for reduction and oxidation of **12c** in CH<sub>2</sub>Cl<sub>2</sub> (containing 0.1 mol.L<sup>-1</sup> (nBu<sub>4</sub>N)PF<sub>6</sub>) on Pt microdisk (r = 0.25 mm), scan rate is 0.2 V/s

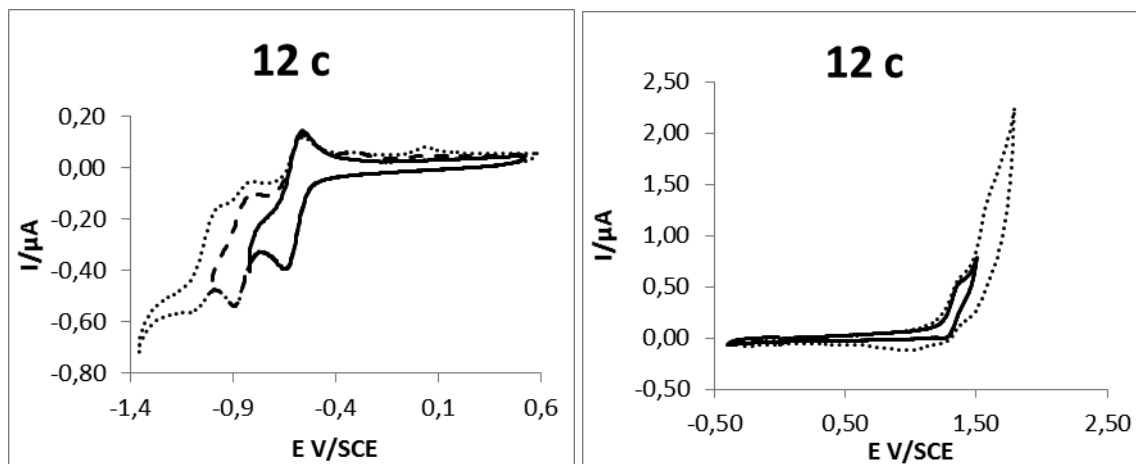

**12d.** 13,16-dimethoxy-4,7-diphenyl-13,16-bis(trifluoromethyl)-1,10-bis[4-(trifluoromethyl) phenyl]cyclooctadeca-1,2,3,7,8,9-hexaen-5,11,14,17-tetrayne

SW voltammograms for reduction and oxidation of **12d** in CH<sub>2</sub>Cl<sub>2</sub> (containing 0.1 mol.L<sup>-1</sup> (nBu<sub>4</sub>N)PF<sub>6</sub>) on Pt microdisk (r = 0.25 mm).

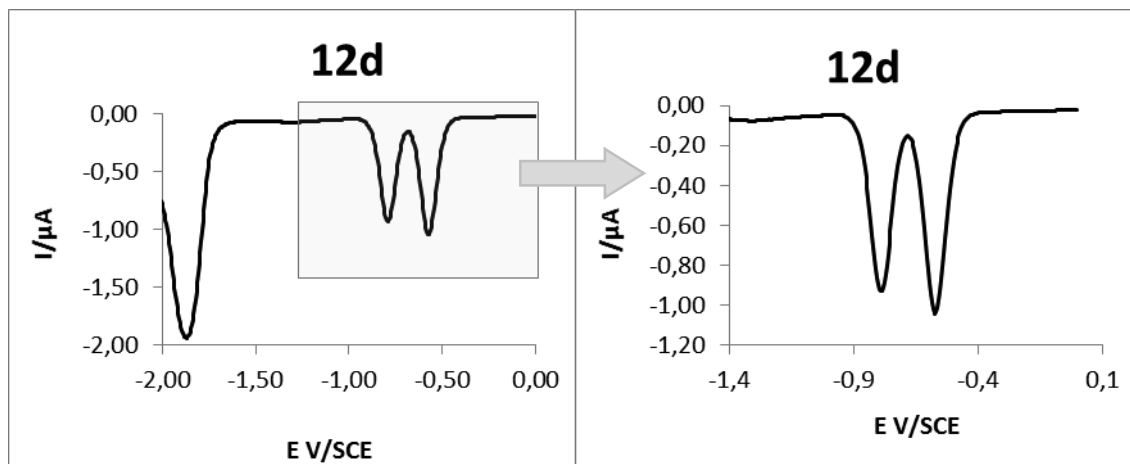



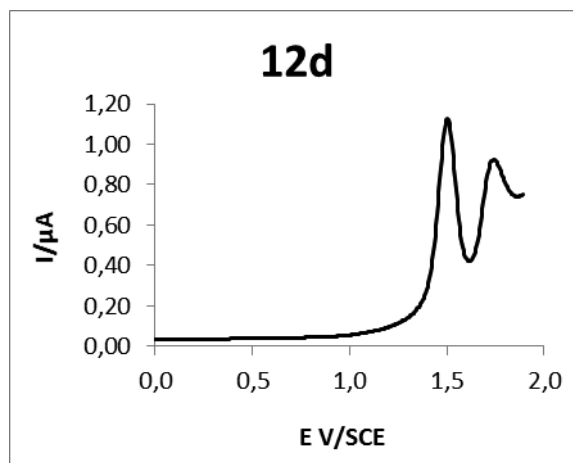

Cyclic voltammograms for reduction and oxidation of **12d** in  $\text{CH}_2\text{Cl}_2$  (containing  $0.1 \text{ mol.L}^{-1}$   $(\text{nBu}_4\text{N})\text{PF}_6$ ) on Pt microdisk ( $r = 0.25 \text{ mm}$ ), scan rate is  $0.2 \text{ V/s}$

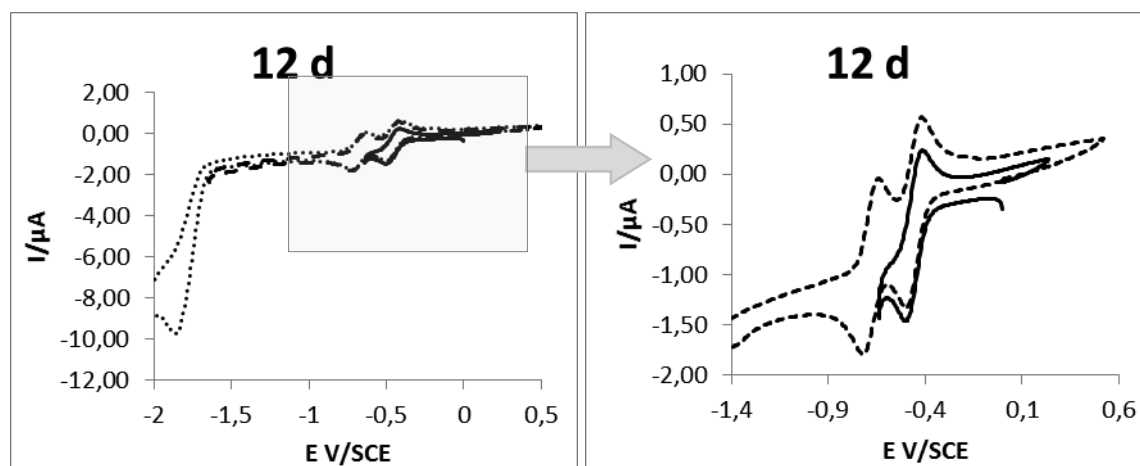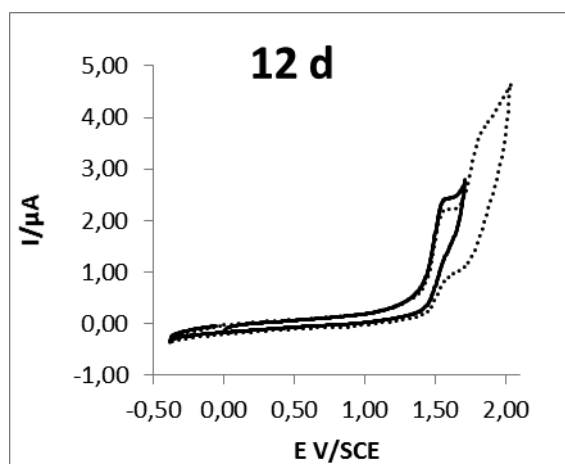

**12e.** 9-(4-{10-[4-(9*H*-carbazol-9-yl)phenyl]-13,16-dimethoxy-4,7-diphenyl-13,16-bis(trifluoromethyl)cyclooctadeca-1,2,3,7,8,9-hexaen-5,11,14,17-tetrayn-1-yl}phenyl)-9*H*-carbazole

SW voltammograms for reduction and oxidation of **12e** in CH<sub>2</sub>Cl<sub>2</sub> (containing 0.1 mol.L<sup>-1</sup> (nBu<sub>4</sub>N)PF<sub>6</sub>) on Pt microdisk (r = 0.25 mm).

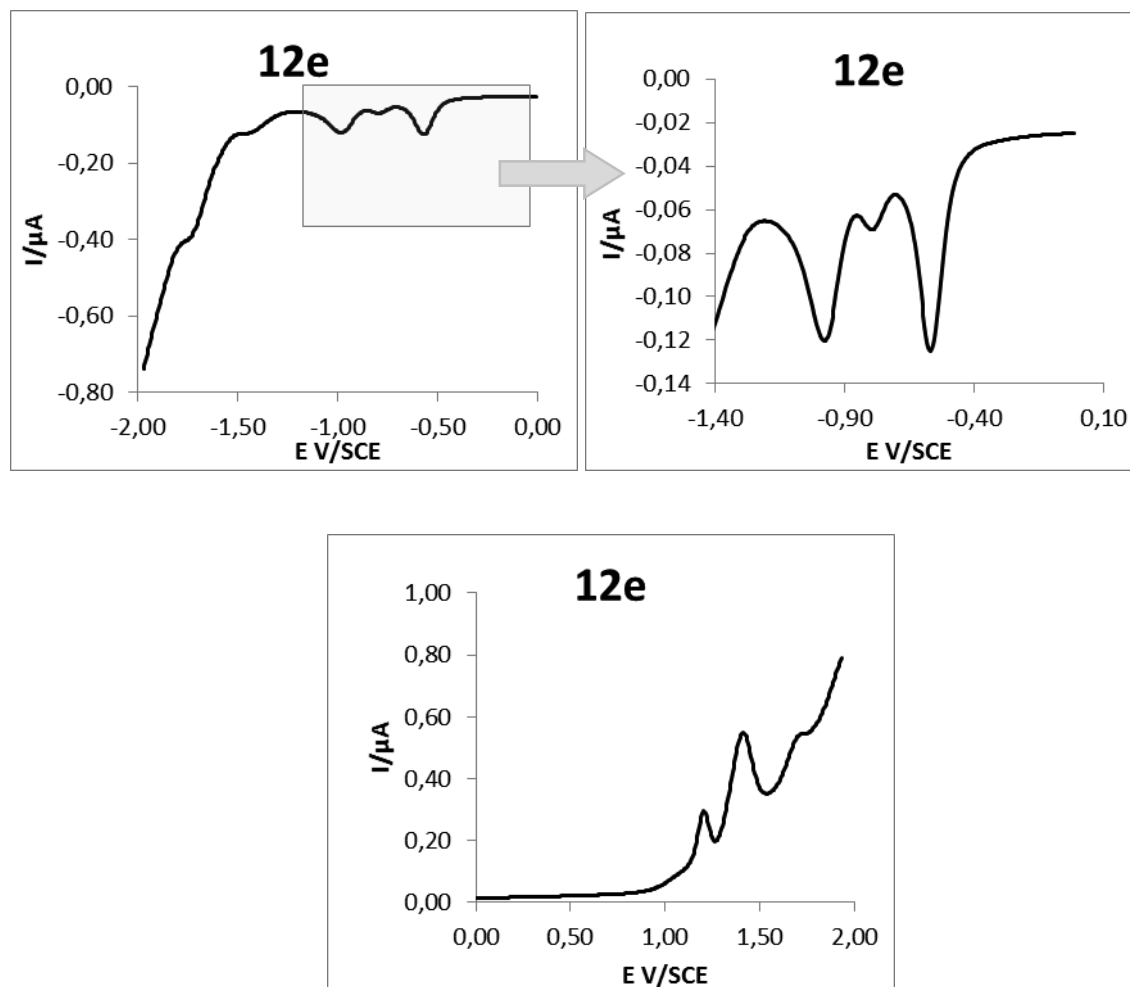

Cyclic voltammograms for reduction and oxidation of **12e** in CH<sub>2</sub>Cl<sub>2</sub> (containing 0.1 mol.L<sup>-1</sup> (nBu<sub>4</sub>N)PF<sub>6</sub>) on Pt microdisk (r = 0.25 mm), scan rate is 0.2 V/s.

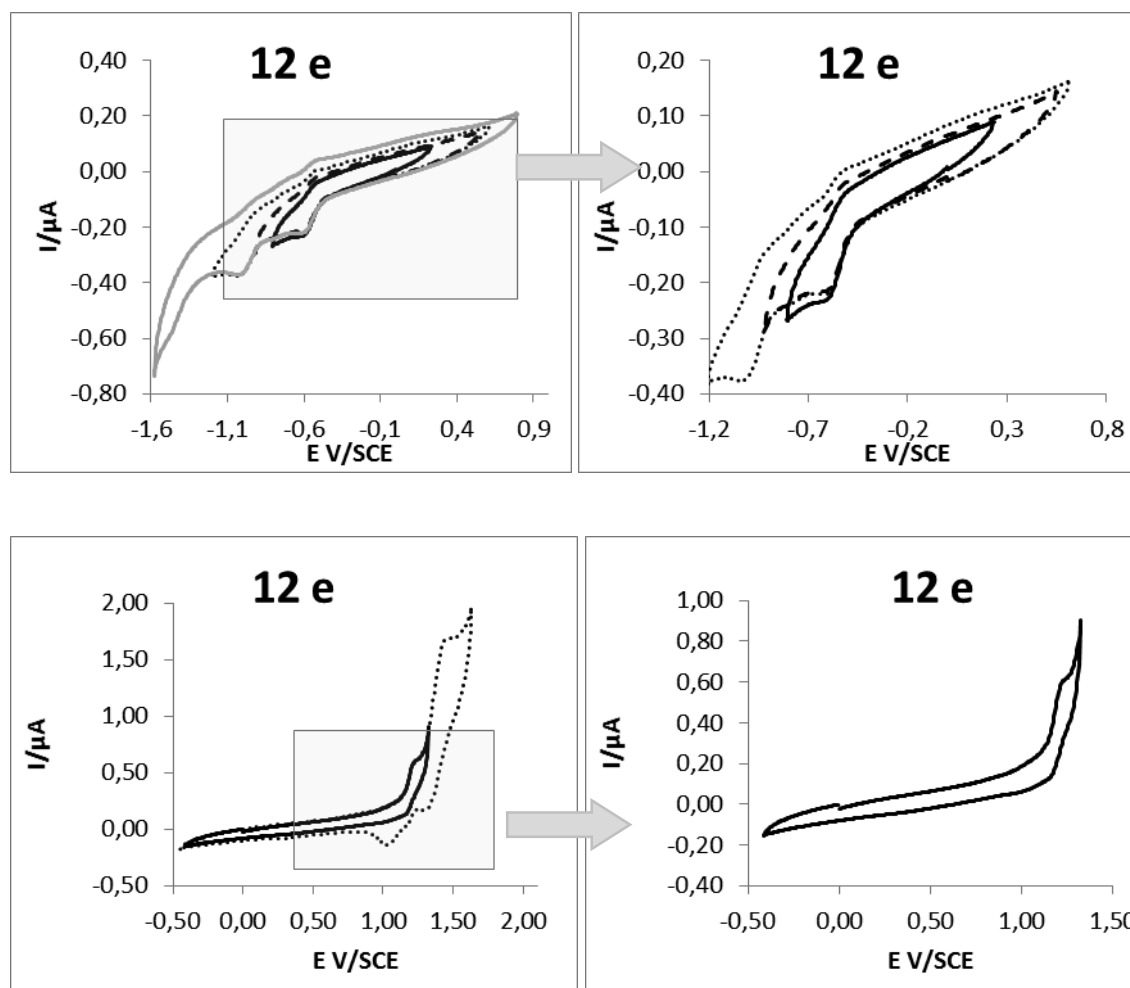

**12f.** 1-(4-{10-[4-(1H-indol-1-yl)phenyl]-13,16-dimethoxy-4,7-diphenyl-13,16-bis(trifluoromethyl)cyclooctadeca-1,2,3,7,8,9-hexaen-5,11,14,17-tetrayn-1-yl}phenyl)-1H-indole

SW voltammograms for reduction and oxidation of **12f** in CH<sub>2</sub>Cl<sub>2</sub> (containing 0.1 mol.L<sup>-1</sup> (nBu<sub>4</sub>N)PF<sub>6</sub>) on Pt microdisk (r = 0.25 mm).

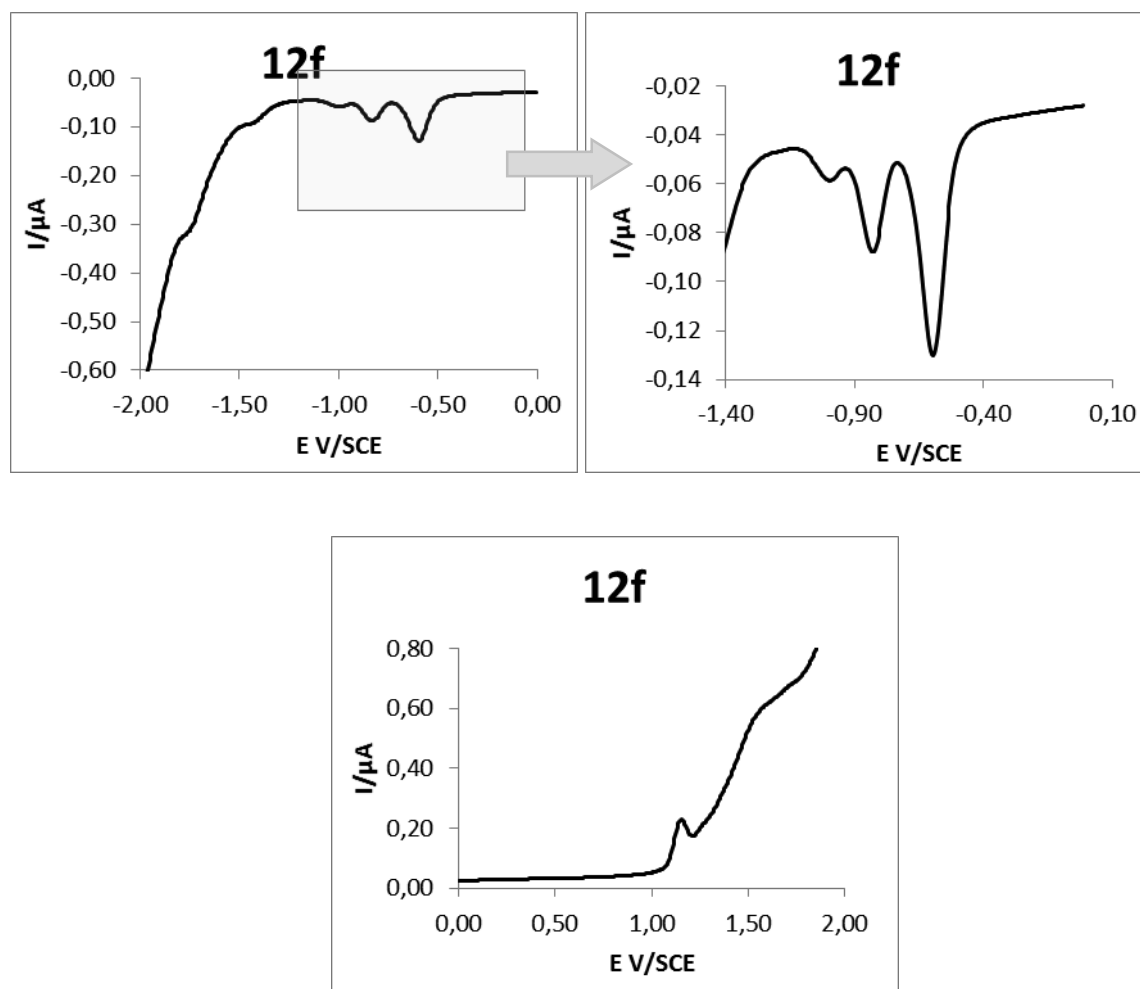

Cyclic voltammograms for reduction and oxidation of **12f** in CH<sub>2</sub>Cl<sub>2</sub> (containing 0.1 mol.L<sup>-1</sup> (nBu<sub>4</sub>N)PF<sub>6</sub>) on Pt microdisk (r = 0.25 mm), scan rate is 0.2 V/s

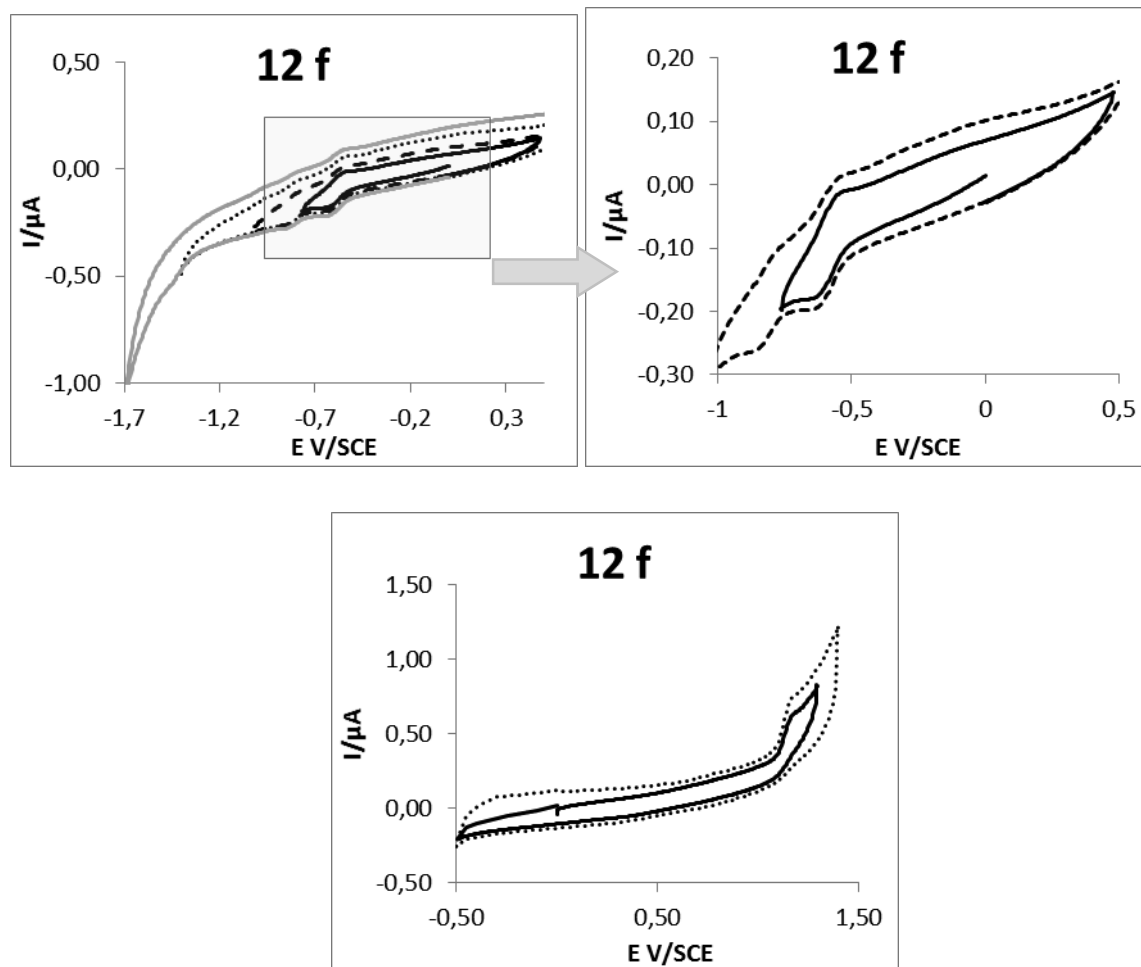

## 7. UV-vis absorption spectra and solvatochromism of 12d.

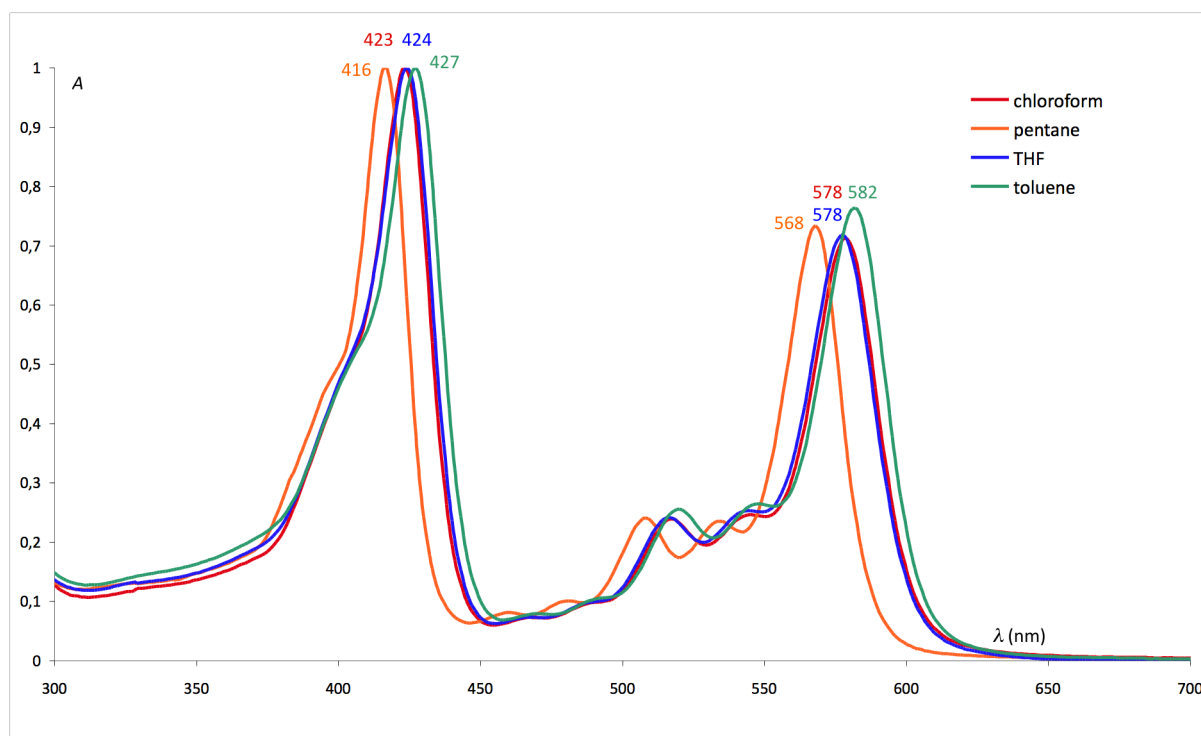

## 8. References.

1. V. Maraval, L. Leroyer, A. Harano, C. Barthes, A. Saquet, C. Duhayon, T. Shinmyuzo, R. Chauvin, *Chem. Eur. J.* 2011, **17**, 5086.
2. a) L. Maurette, C. Tedeschi, E. Sermot, M. Soleilhavoup, F. Hussain, B. Donnadieu, R. Chauvin, *Tetrahedron* 2004, **60**, 10077; b) L. Leroyer, C. Zou, V. Maraval, R. Chauvin, *CR Chimie* 2009, **12**, 412.
3. A. Rives, V. Maraval, N. Saffon-Merceron, R. Chauvin, *Chem. Eur. J.* 2014, **20**, 483.
4. A. Rives, I. Baglai, V. Malytskiy, V. Maraval, N. Saffon-Merceron, Z. V. Voitenko, R. Chauvin, *Chem. Commun.* 2012, 8763.
5. Palatinus L., Chapuis G. *J. Appl. Cryst.* 2007, **40**, 786.
6. Betteridge, P. W., Carruthers, J. R., Cooper, R. I., Prout, K.; Watkin, D. J. *J. Appl. Cryst.* 2003, **36**, 1487.
7. International Tables for X-ray Crystallography, Vol. IV, Kynoch Press, Birmingham,

---

England, 1974.

8. R. H. Blessing, *Acta Cryst.* 1995, **a51**, 33.

9. SAINT-NT Bruker AXS: Madison Wisconsin, 2000.

10. SADABS (2006 and 2008), Program for data correction, Bruker-AXS.

11. SHELXL-97, Program for Crystal Structure Refinement, G. M. Sheldrick, University of Göttingen, *Acta Crystallogr., Sect. A* 2008, **64**, 112-122.
